# Supplementary material for: Some structural features of the peptide profile of myelin basic protein-hydrolyzing antibodies in schizophrenic patients
Source: PeerJ journal article supplement (doi:10.7717/peerj.15584), 2023-07-06

**Figure S1.** Dependence of the abundance of selected features on proteolytic activity of IgG against MBP.

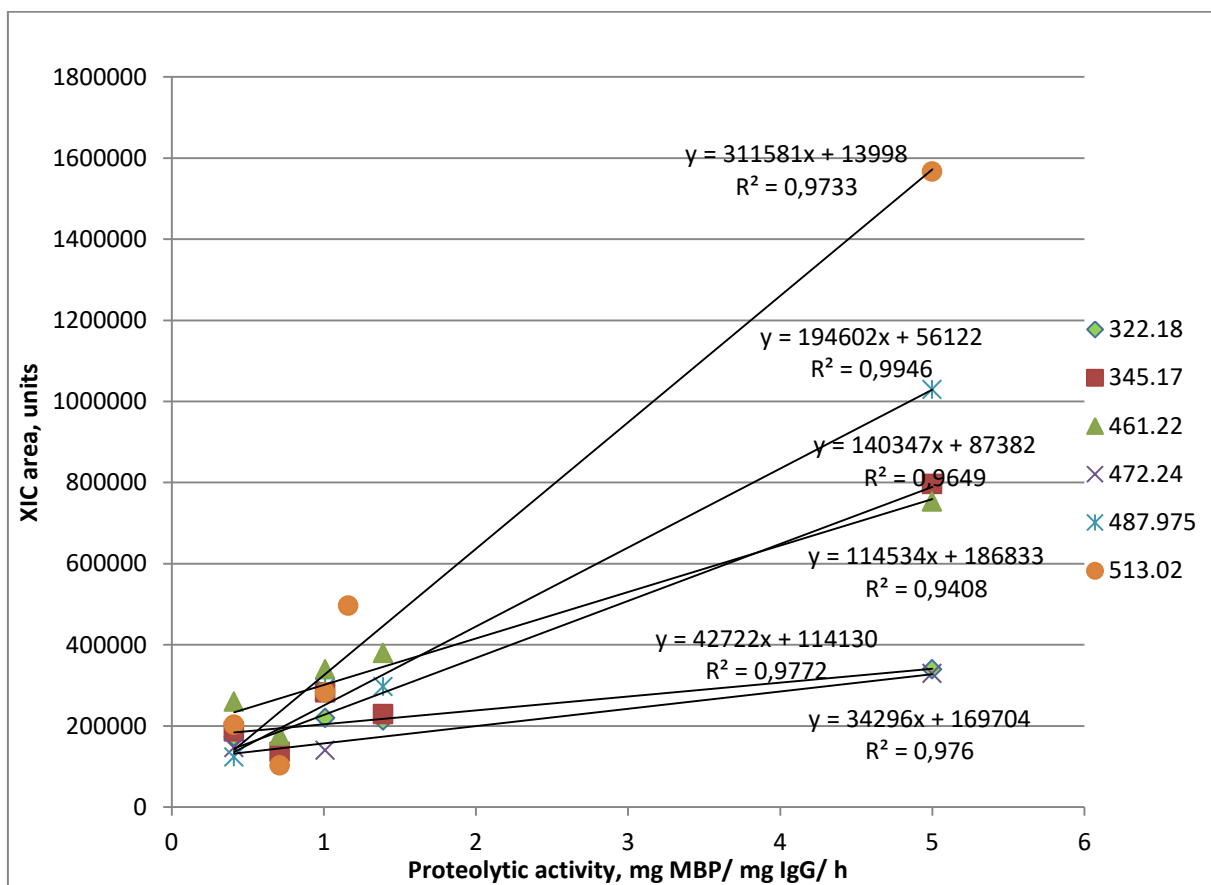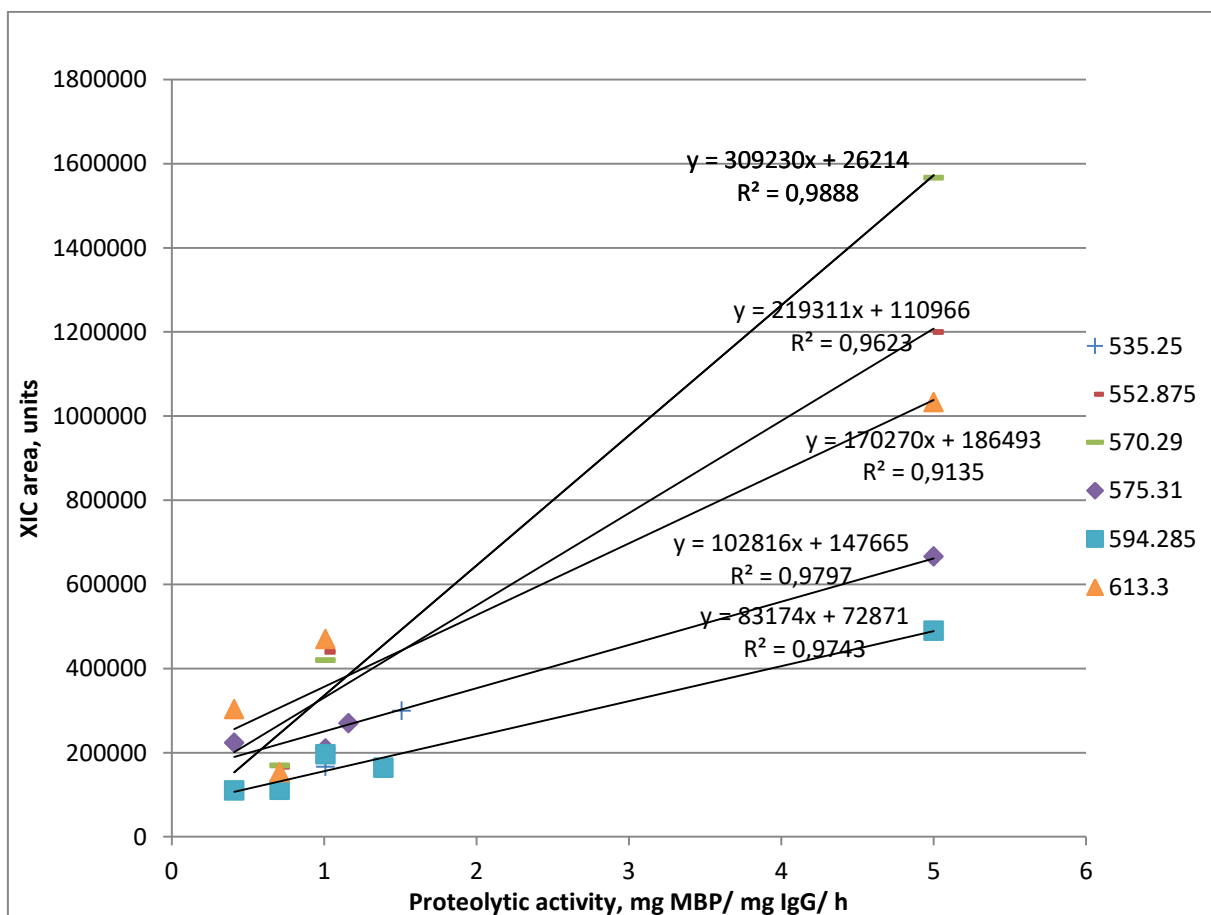

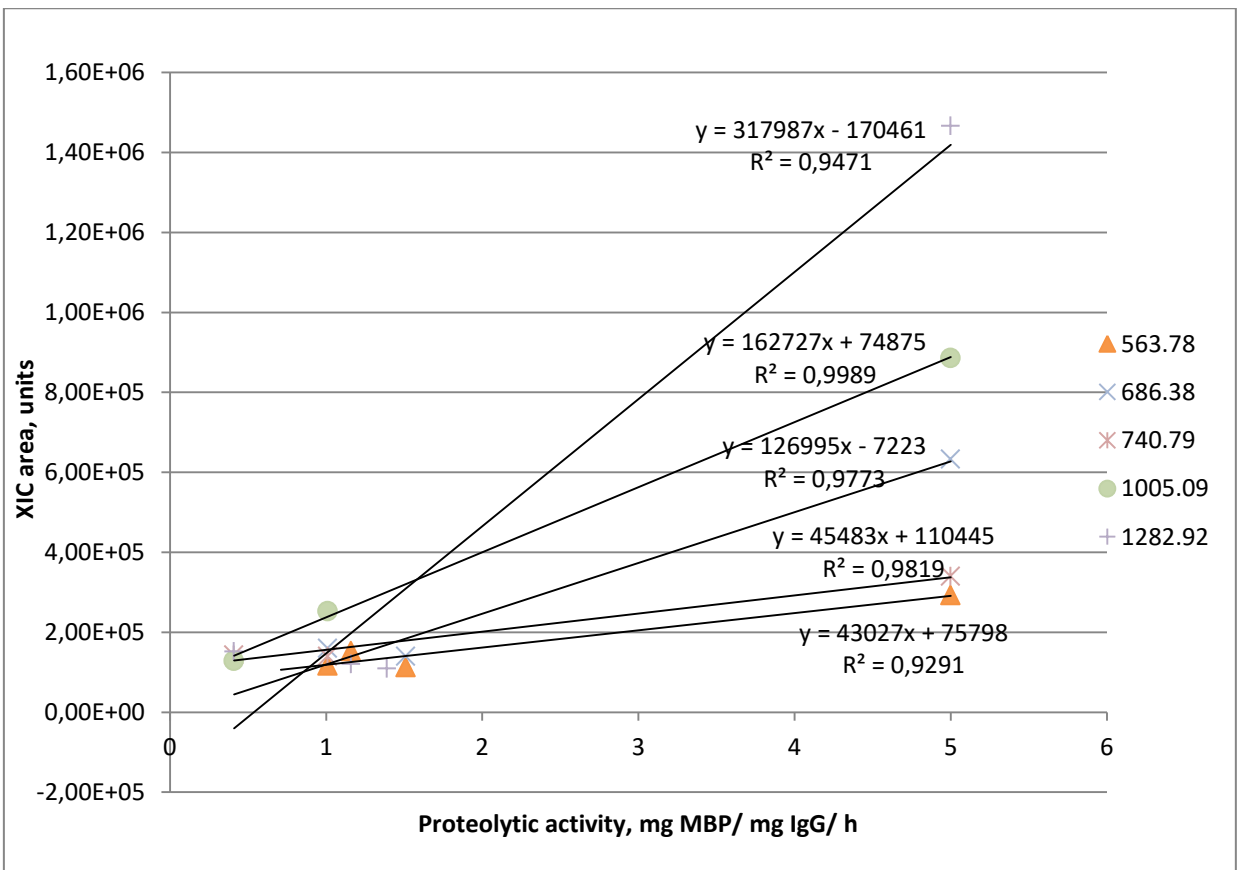

Supplement: Figure_S1.pdf [file Figure_S1.pdf]
