# Supplementary material for: Some structural features of the peptide profile of myelin basic protein-hydrolyzing antibodies in schizophrenic patients
Source: PeerJ journal article supplement (doi:10.7717/peerj.15584), 2023-07-06
Supplement: Figure_S2.pdf [file Figure_S2.pdf]

**Correspondence of b- and y-fragments of the predicted peptide sequences to MS/MS spectra of selected m/z features.**

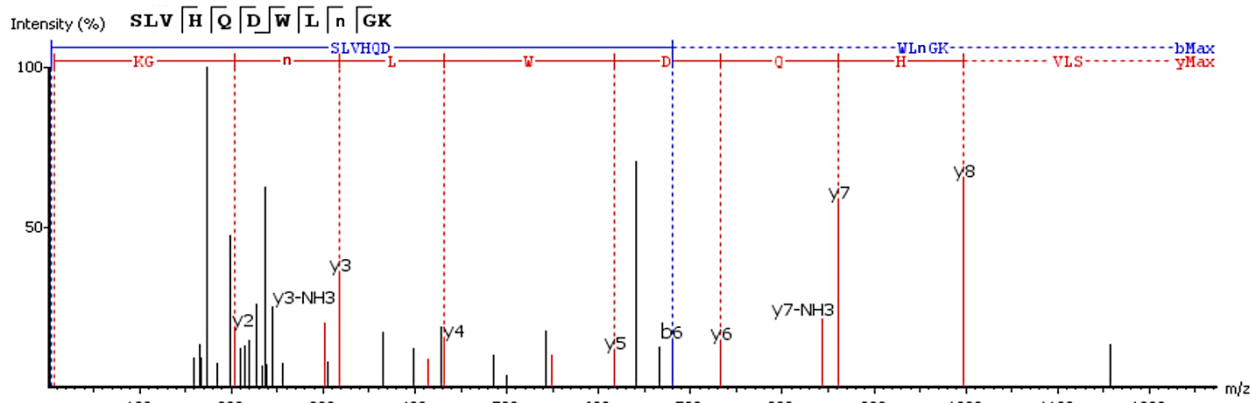

**Figure S1.1.** Correspondence of b- and y-fragments of the predicted peptide SLVHGDWLN(-17)GK to MS/MS spectrum of  $m/z = 427.219^{3+}$ . Peptide sequence has been corrected to SVLHGDWLN(-17)GK after BLAST alignment and validation by Peptide fragmentation modeling utility.

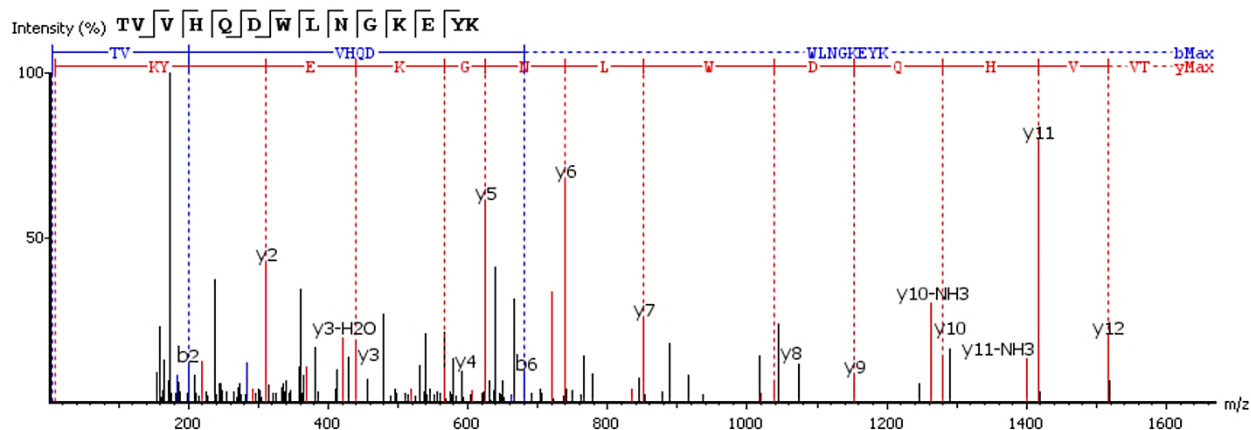

**Figure S1.2.** Correspondence of b- and y-fragments of the predicted peptide TVVHGDWLN(+0.98)GKEYK or TVVHQN(+0.98)WLDGKEYK to MS/MS spectrum of  $m/z = 430.219^{4+}$ .

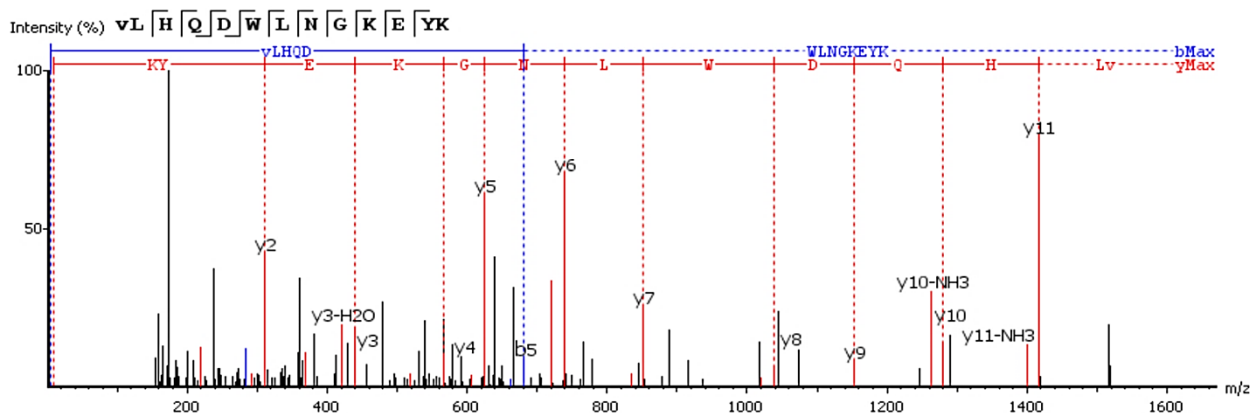

**Figure S1.3.** Correspondence of b- and y-fragments of the predicted peptide SVLHGDWLN(+0.98)GKEYK or SVLHQN(+0.98)WLDGKEYK to MS/MS spectrum of  $m/z = 430.219^{4+}$ .

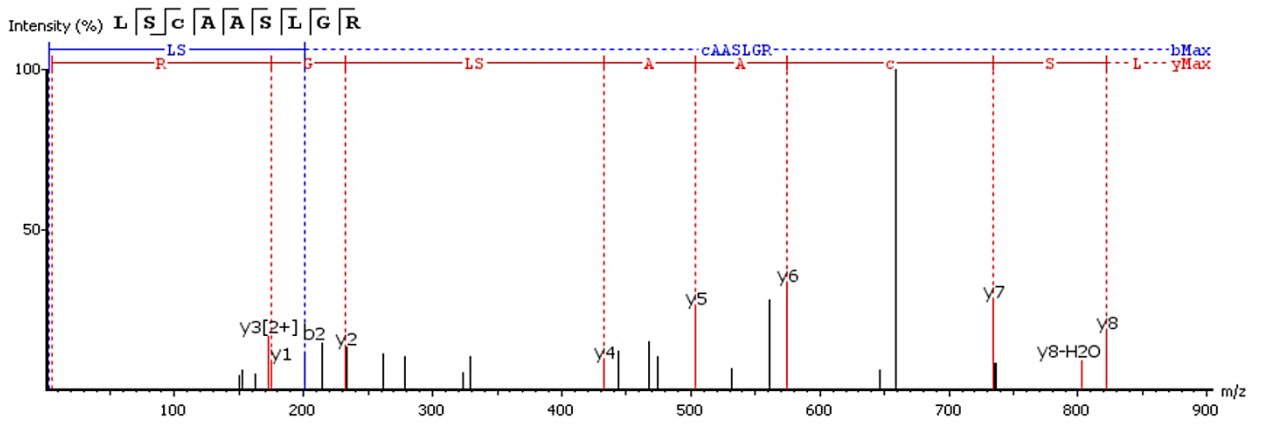

**Figure S1.4.** Correspondence of b- and y-fragments of the predicted peptide LSC(+57)AASGLR to MS/MS spectrum of  $m/z = 467.742^{2+}$ .

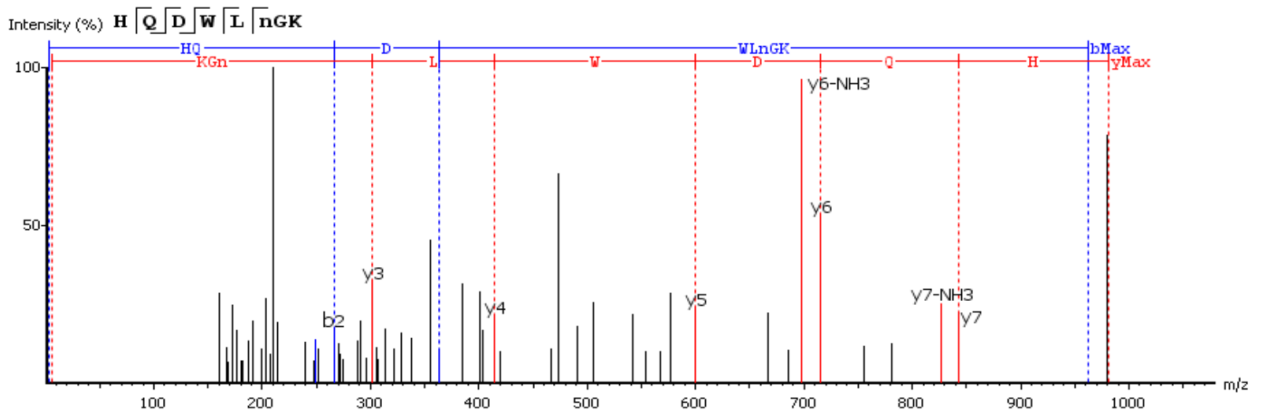

**Figure S1.5.** Correspondence of b- and y-fragments of the predicted peptide HQDWLN(-17)GK to MS/MS spectrum of  $m/z = 490.733^{2+}$ .

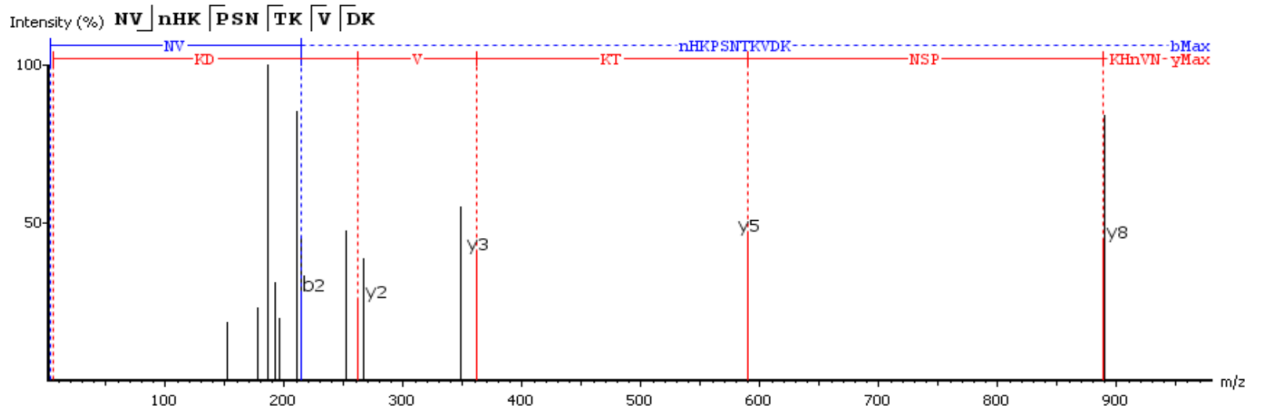

**Figure S1.6.** Correspondence of b- and y-fragments of the predicted peptide NVN(+0.98)HKPSNTKVDK to MS/MS spectrum of  $m/z = 494.596^{3+}$ .

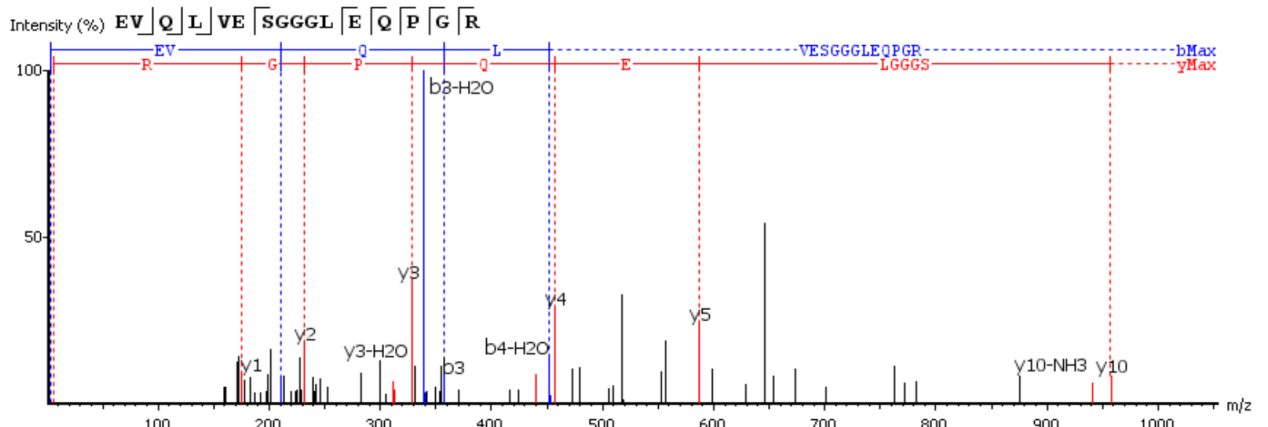

**Figure S1.7.** Correspondence of b- and y-fragments of the predicted peptide EVQLVESGGGLEQPGR to MS/MS spectrum of  $m/z = 552.29^{3+}$ .

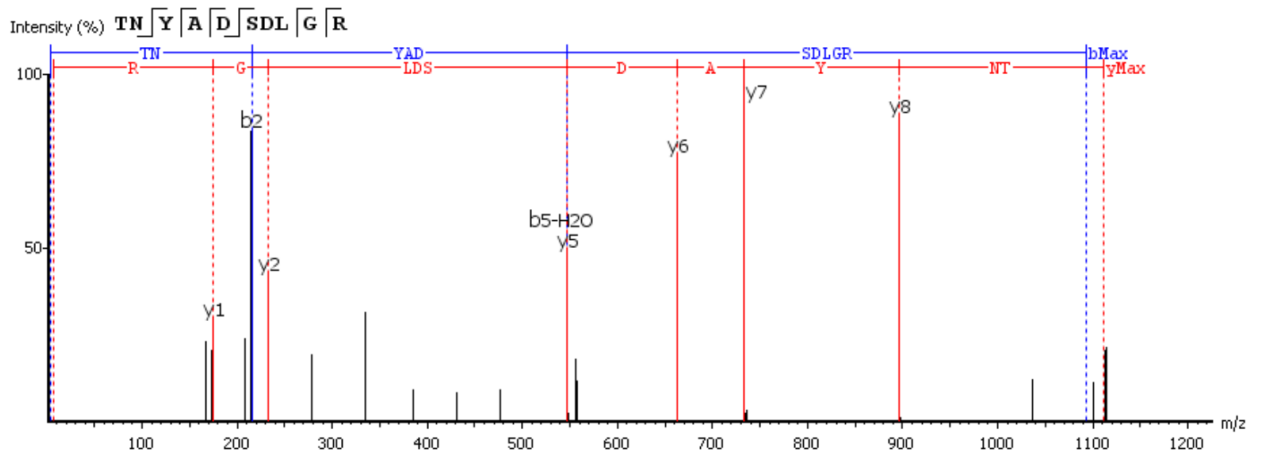

**Figure S1.8.** Correspondence of b- and y-fragments of the predicted peptide TNYADSDLGR to MS/MS spectrum of  $m/z = 556.254^{2+}$ . Di-peptides DL and VE are equivalent in mass, and peptide sequence has been corrected to TNYADSVEGR after BLAST alignment.

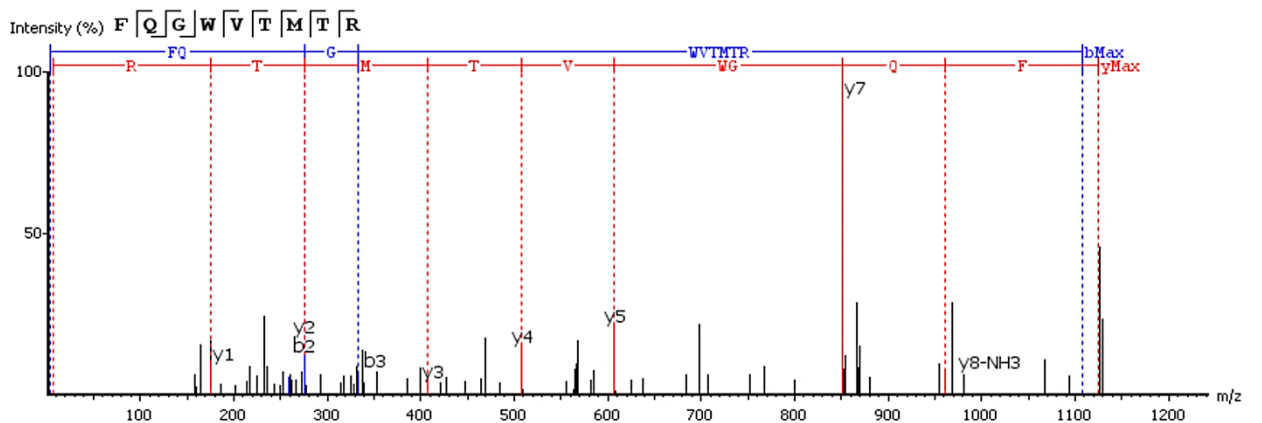

**Figure S1.9.** Correspondence of b- and y-fragments of the predicted peptide FQ(+0.98)GWVTMTR to MS/MS spectrum of  $m/z = 563.78^{2+}$ .

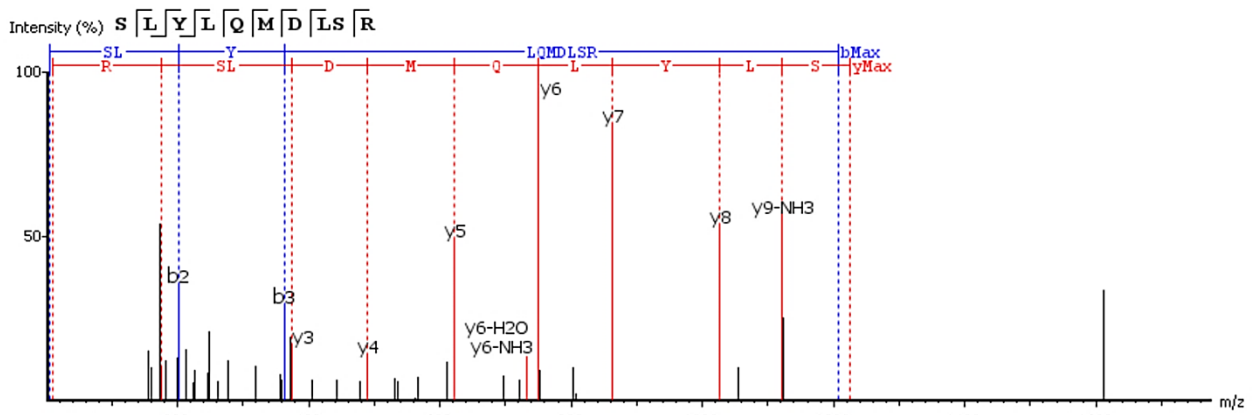

**Figure S1.10.** Correspondence of b- and y-fragments of the predicted peptide \*LYLQMN(+0.98)SLR to MS/MS spectrum of  $m/z = 613.3^{3+}$ .

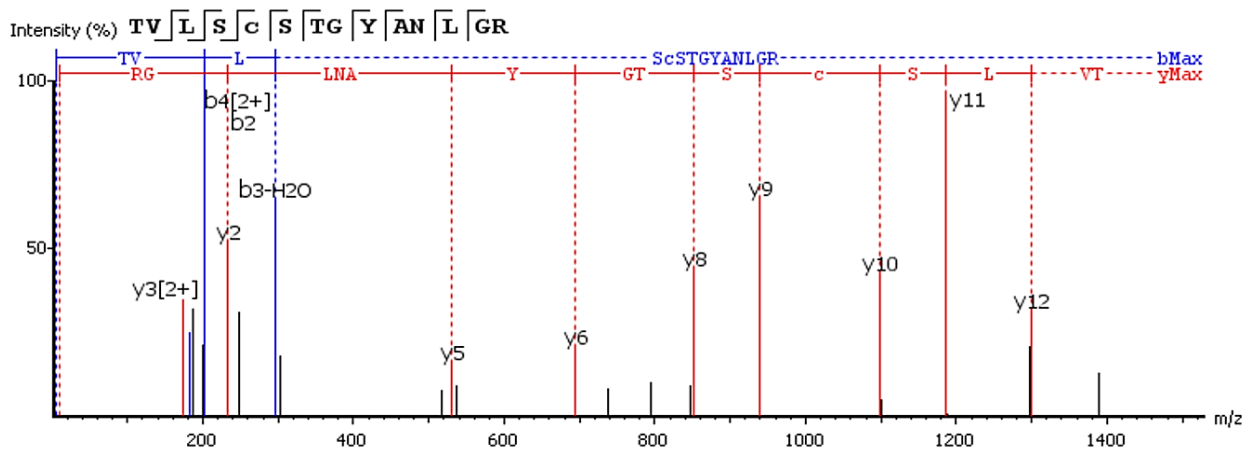

**Figure S1.11.** Correspondence of b- and y-fragments of the predicted peptide VTLSC(+57)SGTYANLGR to MS/MS spectrum of  $m/z = 749.869^{2+}$ .

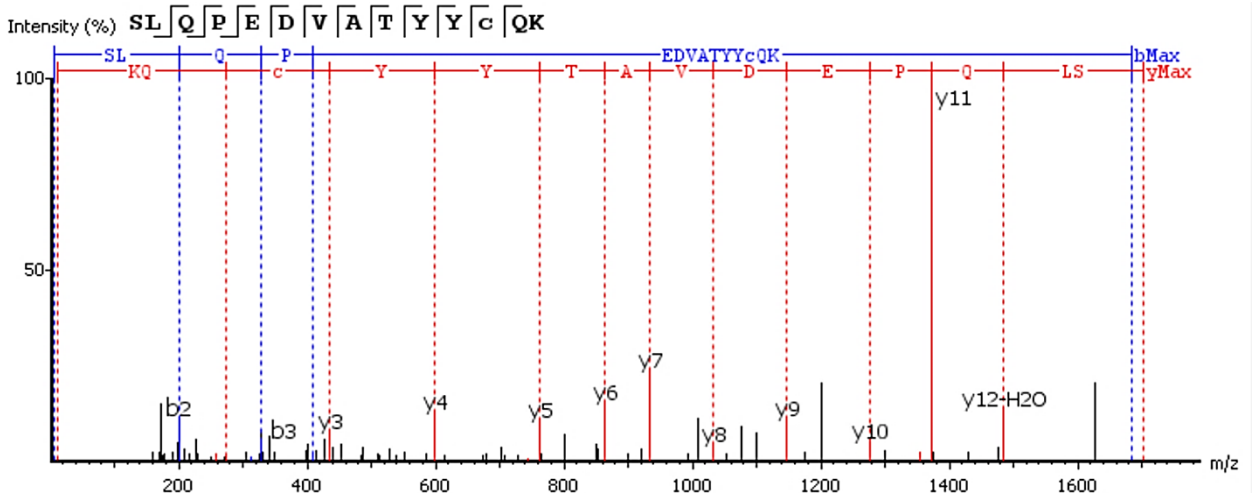

**Figure S1.12.** Correspondence of b- and y-fragments of the predicted peptide SLQPEDVATYYC(+57)QK to MS/MS spectrum of  $m/z = 851.393^{2+}$ .
