# Supplementary material for: Some structural features of the peptide profile of myelin basic protein-hydrolyzing antibodies in schizophrenic patients
Source: PeerJ. 2023 Jul 6;11:e15584. doi: 10.7717/peerj.15584 (PMC10329820; doi:10.7717/peerj.15584)
Supplement: Table S1 [file peerj-11-15584-s001.xlsx]

## Sheet: Лист1
Protein IDs	Majority protein IDs	Peptide counts (all)	Peptide counts (razor+unique)	Peptide counts (unique)	Protein names	Gene names	Fasta headers	Molecular function GO	Number of proteins	Peptides	Razor + unique peptides	Unique peptides	Peptides C1	Peptides C2	Peptides C3	Peptides C4	Peptides C5	Peptides C6	Peptides SCH1	Peptides SCH2	Peptides SCH3	Peptides SCH4	Peptides SCH5	Peptides SCH6	Peptides SCH7	Peptides SCH8	Razor + unique peptides C1	Razor + unique peptides C2	Razor + unique peptides C3	Razor + unique peptides C4	Razor + unique peptides C5	Razor + unique peptides C6	Razor + unique peptides SCH1	Razor + unique peptides SCH2	Razor + unique peptides SCH3	Razor + unique peptides SCH4	Razor + unique peptides SCH5	Razor + unique peptides SCH6	Razor + unique peptides SCH7	Razor + unique peptides SCH8	Unique peptides C1	Unique peptides C2	Unique peptides C3	Unique peptides C4	Unique peptides C5	Unique peptides C6	Unique peptides SCH1	Unique peptides SCH2	Unique peptides SCH3
CON__Q5D862;Q5D862	CON__Q5D862;Q5D862	2;2	2;2	2;2	Filaggrin-2	FLG2	sp|Q5D862|FILA2_HUMAN Filaggrin-2 OS=Homo sapiens OX=9606 GN=FLG2 PE=1 SV=1	cytoskeletal protein(PC00085)	2	2	2	2	2	1	2	2	1	2	2	2	2	2	2	1	1	1	2	1	2	2	1	2	2	2	2	2	2	1	1	1	2	1	2	2	1	2	2	2	2
CON__Q86YZ3;Q86YZ3	CON__Q86YZ3;Q86YZ3	9;9	9;9	9;9	Hornerin	HRNR	sp|Q86YZ3|HORN_HUMAN Hornerin OS=Homo sapiens OX=9606 GN=HRNR PE=1 SV=2	cytoskeletal protein(PC00085)	2	9	9	9	9	5	7	7	2	9	8	6	5	7	5	4	4	4	9	5	7	7	2	9	8	6	5	7	5	4	4	4	9	5	7	7	2	9	8	6	5
A0A0A0MS51;A0A0A0MT01;P06396-2;P06396-4;P06396-3;P06396;CON__Q3SX14;Q5T0I0	A0A0A0MS51;A0A0A0MT01;P06396-2;P06396-4;P06396-3;P06396;CON__Q3SX14	3;3;3;3;3;3;2;1	3;3;3;3;3;3;2;1	3;3;3;3;3;3;2;1	Gelsolin	GSN	tr|A0A0A0MS51|A0A0A0MS51_HUMAN Isoform of P06396, Actin-depolymerizing factor OS=Homo sapiens OX=9606 GN=GSN PE=1 SV=1;tr|A0A0A0MT01|A0A0A0MT01_HUMAN Isoform of P06396, Actin-depolymerizing factor OS=Homo sapiens OX=9606 GN=GSN PE=1 SV=1;sp|P06396-2|GELS-2	transfer/carrier protein(PC00219)	8	3	3	3	1	2	2	1	1	1	2	1	1	3	2	1	1	1	1	2	2	1	1	1	2	1	1	3	2	1	1	1	1	2	2	1	1	1	2	1	1
CON__P02768-1;P02768;A0A0C4DGB6;A0A087WWT3;B7WNR0;P02768-3;H0YA55;C9JKR2;D6RHD5;P02768-2;H7C013	CON__P02768-1;P02768;A0A0C4DGB6;A0A087WWT3;B7WNR0;P02768-3;H0YA55;C9JKR2;D6RHD5;P02768-2	47;47;44;31;31;31;30;29;29;29;18	42;42;39;28;27;28;25;25;25;25;17	42;42;39;28;27;28;25;25;25;25;17	Serum albumin	ALB	sp|P02768|ALBU_HUMAN Albumin OS=Homo sapiens OX=9606 GN=ALB PE=1 SV=2;tr|A0A0C4DGB6|A0A0C4DGB6_HUMAN Isoform of P02768, Albumin OS=Homo sapiens OX=9606 GN=ALB PE=1 SV=1;tr|A0A087WWT3|A0A087WWT3_HUMAN Isoform of P02768, Albumin OS=Homo sapiens OX=9606 GN=A	transfer/carrier protein(PC00219)	11	47	42	42	35	33	36	33	36	36	40	39	34	35	44	43	38	41	30	28	31	28	31	31	35	34	29	30	39	38	34	36	30	28	31	28	31	31	35	34	29
Q9H4B7;CON__ENSEMBL:ENSBTAP00000025008;A0A075B736;Q5SQY0;Q3ZCM7;A6NNZ2	Q9H4B7;CON__ENSEMBL:ENSBTAP00000025008	5;3;2;2;2;2	3;1;0;0;0;0	3;1;0;0;0;0	Tubulin beta-1 chain	TUBB1	sp|Q9H4B7|TBB1_HUMAN Tubulin beta-1 chain OS=Homo sapiens OX=9606 GN=TUBB1 PE=1 SV=1;	tubulin(PC00228)	6	5	3	3	3	4	4	2	3	1	3	4	5	4	3	4	2	4	1	2	2	0	1	0	1	2	3	2	1	2	0	2	1	2	2	0	1	0	1	2	3
CON__Q9UE12;CON__Q15323;Q15323;CON__A2A5Y0;CON__Q9D646	CON__Q9UE12;CON__Q15323;Q15323;CON__A2A5Y0;CON__Q9D646	6;6;6;4;3	4;4;4;3;3	1;1;1;0;0	Keratin, type I cuticular Ha1	KRT31	sp|Q15323|K1H1_HUMAN Keratin, type I cuticular Ha1 OS=Homo sapiens OX=9606 GN=KRT31 PE=1 SV=3;;		5	6	4	1	4	6	3	1	3	5	4	2	3	1	1	1	1	1	3	4	1	0	1	3	3	1	2	0	0	0	0	0	1	1	0	0	0	1	1	0	0
CON__Q6NT21;P78385;A0A087X106;CON__O43790;CON__P78385;CON__Q14533;O43790;Q14533;A6NCN2	CON__Q6NT21;P78385;A0A087X106;CON__O43790;CON__P78385;CON__Q14533;O43790;Q14533;A6NCN2	13;13;12;12;12;12;12;12;7	13;13;12;12;12;12;12;12;7	2;2;2;2;1;2;2;2;1	Keratin, type II cuticular Hb3;Keratin, type II cuticular Hb6;Keratin, type II cuticular Hb1;Putative keratin-87 protein	KRT83;KRT81;KRT86;KRT87P	sp|P78385|KRT83_HUMAN Keratin, type II cuticular Hb3 OS=Homo sapiens OX=9606 GN=KRT83 PE=1 SV=2;tr|A0A087X106|A0A087X106_HUMAN Isoform of Q14533, Keratin, type II cuticular Hb1 OS=Homo sapiens OX=9606 GN=KRT81 PE=1 SV=1;;;;sp|O43790|KRT86_HUMAN Keratin, t		9	13	13	2	4	13	2	0	1	6	5	0	2	0	0	1	1	0	4	13	2	0	1	6	5	0	2	0	0	1	1	0	1	2	1	0	1	1	2	0	1
D6RF35;P02774-2;P02774;P02774-3;D6RBJ7;CON__Q3MHN5;CON__ENSEMBL:ENSBTAP00000018229	D6RF35;P02774-2;P02774;P02774-3;D6RBJ7;CON__Q3MHN5;CON__ENSEMBL:ENSBTAP00000018229	2;2;2;2;1;1;1	2;2;2;2;1;1;1	2;2;2;2;1;1;1	Vitamin D-binding protein	GC	tr|D6RF35|D6RF35_HUMAN Isoform of P02774, Gc-globulin OS=Homo sapiens OX=9606 GN=GC PE=1 SV=1;sp|P02774-2|VTDB-2_HUMAN Isoform of P02774, Isoform 2 of Vitamin D-binding protein OS=Homo sapiens OX=9606 GN=GC PE=1 SV=2;sp|P02774|VTDB_HUMAN Vitamin D-binding		7	2	2	2	0	0	0	0	0	0	1	0	0	0	2	1	2	0	0	0	0	0	0	0	1	0	0	0	2	1	2	0	0	0	0	0	0	0	1	0	0
O95678;CON__O95678;CON__Q8BGZ7	O95678;CON__O95678;CON__Q8BGZ7	9;9;6	2;2;0	2;2;0	Keratin, type II cytoskeletal 75	KRT75	sp|O95678|K2C75_HUMAN Keratin, type II cytoskeletal 75 OS=Homo sapiens OX=9606 GN=KRT75 PE=1 SV=2;;		3	9	2	2	6	9	6	6	2	6	7	7	6	7	2	4	5	3	0	2	0	0	0	0	1	0	0	1	0	0	0	0	0	2	0	0	0	0	1	0	0
P02538;CON__P02538;CON__P50446	P02538;CON__P02538	22;22;10	9;9;3	2;2;0	Keratin, type II cytoskeletal 6A	KRT6A	sp|P02538|K2C6A_HUMAN Keratin, type II cytoskeletal 6A OS=Homo sapiens OX=9606 GN=KRT6A PE=1 SV=3;		3	22	9	2	17	21	20	17	4	19	21	18	19	21	4	6	8	13	5	9	9	6	1	7	9	6	7	9	0	1	1	4	2	2	2	1	0	2	2	2	2
K7ERE3;CON__ENSEMBL:ENSP00000377550;P13646-3;P13646;CON__P13646-1;P13646-2;K7EMD9;CON__P35900;P35900;J3QR55;K7EQH6;G3V1C2;CON__Q9C075;CON__Q6IFU5;Q9C075;Q6A162	K7ERE3;CON__ENSEMBL:ENSP00000377550;P13646-3;P13646;CON__P13646-1;P13646-2;K7EMD9	11;11;11;11;10;8;7;3;3;1;1;1;1;1;1;1	5;5;5;5;5;4;3;1;1;1;1;1;1;1;1;1	3;3;3;3;3;2;1;0;0;0;0;0;0;0;0;0	Keratin, type I cytoskeletal 13	KRT13	tr|K7ERE3|K7ERE3_HUMAN Isoform of P13646, Keratin, type I cytoskeletal 13 OS=Homo sapiens OX=9606 GN=KRT13 PE=1 SV=1;;sp|P13646-3|K1C13-3_HUMAN Isoform of P13646, Isoform 3 of Keratin, type I cytoskeletal 13 OS=Homo sapiens OX=9606 GN=KRT13 PE=1 SV=4;sp|P1		16	11	5	3	8	7	11	6	3	9	6	6	6	6	4	4	5	8	3	1	5	0	1	3	0	0	0	0	0	1	0	2	3	0	3	0	0	1	0	0	0
P02042;E9PFT6;E9PEW8;CON__Q3SX09;C9JRG0;CON__P02070;P02100	P02042;E9PFT6;E9PEW8	9;7;6;2;1;1;1	3;2;2;0;0;0;0	3;2;2;0;0;0;0	Hemoglobin subunit delta	HBD	sp|P02042|HBD_HUMAN Hemoglobin subunit delta OS=Homo sapiens OX=9606 GN=HBD PE=1 SV=2;tr|E9PFT6|E9PFT6_HUMAN Isoform of P02042, Hemoglobin subunit delta OS=Homo sapiens OX=9606 GN=HBD PE=1 SV=1;tr|E9PEW8|E9PEW8_HUMAN Isoform of P02042, Hemoglobin subunit d		7	9	3	3	9	7	8	4	5	6	8	8	7	8	5	5	7	7	3	2	2	0	1	0	2	3	2	3	0	1	2	3	3	2	2	0	1	0	2	3	2
P02533;CON__P02533;CON__Q6IFX2;CON__Q9QWL7;CON__A2A4G1;K7EPJ9;CON__P08727;P08727;CON__P19001;C9JM50;A8MT21;P19012-2;K7ESE1;CON__Q9D312;K7ENV3;A0A3B3IS58;CON__Q8N1A0;C9JTG5;K7EMS3;Q8N1A0-2;Q8N1A0	P02533;CON__P02533	22;22;10;10;7;7;5;5;5;4;3;3;3;2;2;2;1;1;1;1;1	9;9;5;4;0;2;0;0;0;0;0;0;3;0;0;0;0;0;0;0;0	4;4;3;0;0;0;0;0;0;0;0;0;0;0;0;0;0;0;0;0;0	Keratin, type I cytoskeletal 14	KRT14	sp|P02533|K1C14_HUMAN Keratin, type I cytoskeletal 14 OS=Homo sapiens OX=9606 GN=KRT14 PE=1 SV=4;		21	22	9	4	17	18	17	21	6	16	20	18	16	20	5	7	15	12	8	8	6	9	1	6	8	6	6	8	1	1	6	4	3	3	2	4	0	1	4	2	2
CON__P13647;P13647;H0YI76;F8W0C6;H0YIN9;F8VV57;CON__P07744;P05787;F8W1U3;CON__Q8VED5;CON__P05787;F8VUG2;F8VP67;CON__H-INV:HIT000016045;P05787-2;P12036;H0YIC5;F8VU69;CON__Q7RTS7;P12036-2;Q86Y46;CON__Q32MB2;Q7RTS7;F8W1S1;CON__Q9H552;CON__REFSEQ:XP_932229;Q14CN4-3;Q8N1N4-2;CON__Q7RTT2;CON__Q8N1N4-2;Q8N1N4;Q14CN4;CON__H-INV:HIT000292931;Q14CN4-2;CON__Q14CN4-1	CON__P13647;P13647	27;27;12;11;7;4;4;3;3;3;3;3;3;3;3;2;2;2;2;2;2;2;2;2;1;1;1;1;1;1;1;1;1;1;1	20;20;8;8;6;4;0;0;0;0;0;0;0;0;0;0;0;2;0;0;0;0;0;0;0;0;1;0;0;0;0;1;0;1;1	5;5;3;0;1;2;0;0;0;0;0;0;0;0;0;0;0;0;0;0;0;0;0;0;0;0;0;0;0;0;0;0;0;0;0	Keratin, type II cytoskeletal 5	KRT5	sp|P13647|K2C5_HUMAN Keratin, type II cytoskeletal 5 OS=Homo sapiens OX=9606 GN=KRT5 PE=1 SV=3		35	27	20	5	22	21	22	25	5	23	24	25	23	22	9	10	14	14	16	14	16	19	3	17	18	18	17	16	6	6	9	9	5	5	5	5	1	5	5	5	4
CON__P08779;P08779;CON__Q9Z2K1;CON__Q3ZAW8;K7ENW6	CON__P08779;P08779	23;23;10;10;8	19;19;8;8;8	10;10;3;3;6	Keratin, type I cytoskeletal 16	KRT16	sp|P08779|K1C16_HUMAN Keratin, type I cytoskeletal 16 OS=Homo sapiens OX=9606 GN=KRT16 PE=1 SV=4		5	23	19	10	14	19	19	20	10	18	20	20	19	20	6	6	13	13	11	16	16	16	7	15	16	16	15	16	3	3	10	10	5	9	8	8	5	8	8	8	9
P07996;P07996-2;CON__Q28194;A8MZG1;A0A7I2YQ86;A0A7I2V585;A0A7I2YQT6;A0A3B3ITK0;P35442	P07996;P07996-2;CON__Q28194	13;9;8;3;1;1;1;1;1	13;9;8;3;1;1;1;1;1	13;9;8;3;1;1;1;1;1	Thrombospondin-1	THBS1	sp|P07996|TSP1_HUMAN Thrombospondin-1 OS=Homo sapiens OX=9606 GN=THBS1 PE=1 SV=2;sp|P07996-2|TSP1-2_HUMAN Isoform of P07996, Isoform 2 of Thrombospondin-1 OS=Homo sapiens OX=9606 GN=THBS1 PE=1 SV=2;		9	13	13	13	9	12	9	5	6	1	8	9	11	11	5	6	5	4	9	12	9	5	6	1	8	9	11	11	5	6	5	4	9	12	9	5	6	1	8	9	11
P35527;CON__P35527;K7EQQ3	P35527;CON__P35527;K7EQQ3	23;23;15	22;22;15	22;22;15	Keratin, type I cytoskeletal 9	KRT9	sp|P35527|K1C9_HUMAN Keratin, type I cytoskeletal 9 OS=Homo sapiens OX=9606 GN=KRT9 PE=1 SV=3;;tr|K7EQQ3|K7EQQ3_HUMAN Isoform of P35527, Keratin, type I cytoskeletal 9 OS=Homo sapiens OX=9606 GN=KRT9 PE=1 SV=1		3	23	22	22	22	22	21	22	14	23	22	23	22	22	20	17	19	21	21	21	20	21	13	22	21	22	21	21	19	16	18	20	21	21	20	21	13	22	21	22	21
CON__P35908v2;P35908;CON__P35908;Q01546;CON__Q01546;H0YID6;CON__Q6NXH9;CON__Q7Z794;Q7Z794;CON__Q9R0H5;CON__P19013;P19013	CON__P35908v2;P35908;CON__P35908	38;38;37;9;8;4;3;2;2;1;1;1	35;35;34;8;7;4;2;0;0;0;1;1	24;24;23;0;0;0;0;0;0;0;0;0	Keratin, type II cytoskeletal 2 epidermal	KRT2	sp|P35908|K22E_HUMAN Keratin, type II cytoskeletal 2 epidermal OS=Homo sapiens OX=9606 GN=KRT2 PE=1 SV=2;		12	38	35	24	33	31	28	34	16	33	34	35	37	34	21	25	28	27	30	28	25	31	14	30	31	32	34	31	19	22	25	24	22	19	18	21	9	22	21	21	24
P13645;CON__P13645;A0A1B0GVI3;CON__P02535-1;Q7Z3Y7;CON__Q7Z3Y7;CON__Q148H6;CON__Q7Z3Y8;CON__Q2M2I5;CON__Q99456;CON__P05784;A0A3B3ITG2;Q7Z3Y8;Q7Z3Z0;Q99456;Q2M2I5;CON__Q7Z3Z0;CON__Q14532;C4AM86;CON__A2AB72;CON__O76015;CON__Q92764;O76015;CON__Q7Z3Y9;Q92764;Q7Z3Y9	P13645;CON__P13645;A0A1B0GVI3	30;30;30;9;4;4;3;2;2;2;2;2;2;2;2;2;2;1;1;1;1;1;1;1;1;1	30;30;30;9;4;4;3;2;2;2;2;2;2;2;2;2;2;1;1;1;1;1;1;1;1;1	24;24;24;5;2;2;1;1;0;0;0;0;1;1;0;0;1;0;0;0;0;0;0;0;0;0	Keratin, type I cytoskeletal 10	KRT10	sp|P13645|K1C10_HUMAN Keratin, type I cytoskeletal 10 OS=Homo sapiens OX=9606 GN=KRT10 PE=1 SV=6;;tr|A0A1B0GVI3|A0A1B0GVI3_HUMAN Isoform of P13645, Keratin, type I cytoskeletal 10 OS=Homo sapiens OX=9606 GN=KRT10 PE=1 SV=2		26	30	30	24	27	28	28	30	22	28	29	27	28	29	21	25	29	28	27	28	28	30	22	28	29	27	28	29	21	25	29	28	22	23	23	24	19	23	23	21	22
P04264;CON__P04264;CON__Q6IFZ6	P04264;CON__P04264	38;37;4	38;37;4	26;25;0	Keratin, type II cytoskeletal 1	KRT1	sp|P04264|K2C1_HUMAN Keratin, type II cytoskeletal 1 OS=Homo sapiens OX=9606 GN=KRT1 PE=1 SV=6;		3	38	38	26	33	34	32	35	22	34	34	33	31	37	23	26	30	29	33	34	32	35	22	34	34	33	31	37	23	26	30	29	22	22	21	23	14	22	22	21	19
I3L4N8;P60709;P63261;E7EVS6;A0A2R8Y793;A0A6Q8PFE4;I3L3I0;I3L1U9;G5E9R0;A0A2R8YGF8;J3KT65;A0A6Q8PH58;I3L3R2;K7EM38;P63267-2;C9JZR7;C9JUM1;A5A3E0;Q6S8J3;C9JTX5;P0CG38;A0A2R8YEA7;F8WCH0;A0A2R8YFE2;Q9BYX7;A0A7P0TBL1;A0A6Q8PGD7	I3L4N8;P60709;P63261;E7EVS6;A0A2R8Y793;A0A6Q8PFE4;I3L3I0;I3L1U9;G5E9R0;A0A2R8YGF8;J3KT65;A0A6Q8PH58;I3L3R2;K7EM38;P63267-2	16;16;16;14;13;12;11;11;8;8;8;8;8;8;8;7;7;6;6;6;5;4;3;3;3;1;1	16;16;16;14;13;12;11;11;8;8;8;8;8;8;8;7;7;6;6;6;5;4;3;3;3;1;1	3;3;3;3;3;3;2;2;1;1;1;1;1;1;0;0;0;0;0;0;0;1;0;0;0;0;0	Actin, cytoplasmic 1;Actin, cytoplasmic 1, N-terminally processed;Actin, cytoplasmic 2;Actin, cytoplasmic 2, N-terminally processed;Actin, gamma-enteric smooth muscle	ACTG1;ACTB;ACTG2	tr|I3L4N8|I3L4N8_HUMAN Isoform of P63261, Actin, cytoplasmic 2 OS=Homo sapiens OX=9606 GN=ACTG1 PE=1 SV=9;sp|P60709|ACTB_HUMAN Actin, cytoplasmic 1 OS=Homo sapiens OX=9606 GN=ACTB PE=1 SV=1;sp|P63261|ACTG_HUMAN Actin, cytoplasmic 2 OS=Homo sapiens OX=9606	actin and actin related protein(PC00039)	27	16	16	3	15	16	16	14	15	12	16	16	16	15	15	16	16	15	15	16	16	14	15	12	16	16	16	15	15	16	16	15	3	3	3	3	3	3	3	3	3
P06753-6;P06753-4;A0A087WWU8;P06753-2;P06753-5;P06753-3;P06753;J3KN67;A0A494C0P6;D6R904;A0A2R2Y2Q3;P06753-7;A0A494C0G0;H0YK48;Q6ZN40;H0YL80;H0YKX5;H0YKJ4;A0A494BZZ2;B7Z596;A0A0S2Z4G6;Q5VU61;H7BYY1;F5H7S3;P09493-10;P09493-5;P09493-2;P09493-9;P09493-8;P09493;P09493-3;P09493-4;P09493-6;P09493-7;H0YKP3	P06753-6;P06753-4;A0A087WWU8;P06753-2;P06753-5;P06753-3;P06753;J3KN67;A0A494C0P6;D6R904;A0A2R2Y2Q3	5;5;5;5;5;5;3;3;3;3;3;2;2;1;1;1;1;1;1;1;1;1;1;1;1;1;1;1;1;1;1;1;1;1;1	4;4;4;4;4;4;2;2;2;2;2;2;1;0;0;0;0;0;0;0;0;1;0;0;0;0;0;0;0;0;0;0;0;0;0	4;4;4;4;4;4;2;2;2;2;2;2;1;0;0;0;0;0;0;0;0;1;0;0;0;0;0;0;0;0;0;0;0;0;0	Tropomyosin alpha-3 chain	TPM3	sp|P06753-6|TPM3-6_HUMAN Isoform of P06753, Isoform 6 of Tropomyosin alpha-3 chain OS=Homo sapiens OX=9606 GN=TPM3 PE=1 SV=2;sp|P06753-4|TPM3-4_HUMAN Isoform of P06753, Isoform 4 of Tropomyosin alpha-3 chain OS=Homo sapiens OX=9606 GN=TPM3 PE=1 SV=2;tr|A0A	actin binding motor protein(PC00040)	35	5	4	4	4	5	4	4	2	1	4	3	3	5	3	2	3	3	3	4	3	3	1	1	3	2	2	4	2	2	2	2	3	4	3	3	1	1	3	2	2
P67936;A0A2R8YGX3;A0A2R8Y5V9;A0A2R8YH90;P67936-2;K7ENT6;A0A2R8YE05;P07951-2;Q5TCU3;CON__Q3SX28;A0A2R8YHD2;A0A2R8YEU4;A0A5F9UN72;A7XZE4;P07951-3;P07951;U3KQK2;A0A590UK79;A0A590UJB9;K7EPB9	P67936;A0A2R8YGX3;A0A2R8Y5V9;A0A2R8YH90;P67936-2;K7ENT6;A0A2R8YE05	8;7;7;5;4;4;4;3;3;3;3;3;3;3;3;3;2;2;2;1	8;7;7;5;4;4;4;3;3;3;3;3;3;3;3;3;2;2;2;1	7;6;6;4;3;3;3;2;2;2;2;2;3;2;2;2;2;2;2;1	Tropomyosin alpha-4 chain	TPM4	sp|P67936|TPM4_HUMAN Tropomyosin alpha-4 chain OS=Homo sapiens OX=9606 GN=TPM4 PE=1 SV=3;tr|A0A2R8YGX3|A0A2R8YGX3_HUMAN Isoform of P67936, Tropomyosin alpha-4 chain OS=Homo sapiens OX=9606 GN=TPM4 PE=1 SV=1;tr|A0A2R8Y5V9|A0A2R8Y5V9_HUMAN Isoform of P67936,	actin binding motor protein(PC00040)	20	8	8	7	7	6	8	2	6	1	6	7	6	7	6	3	5	6	7	6	8	2	6	1	6	7	6	7	6	3	5	6	6	5	7	1	5	1	5	6	5
J3QRS3;P19105;O14950;J3KTJ1;P24844-2;P24844	J3QRS3;P19105;O14950	3;3;3;1;1;1	3;3;3;1;1;1	3;3;3;1;1;1	Myosin regulatory light chain 12A;Myosin regulatory light chain 12B	MYL12A;MYL12B	tr|J3QRS3|J3QRS3_HUMAN Isoform of P19105, Myosin regulatory light chain 12A OS=Homo sapiens OX=9606 GN=MYL12A PE=1 SV=1;sp|P19105|ML12A_HUMAN Myosin regulatory light chain 12A OS=Homo sapiens OX=9606 GN=MYL12A PE=1 SV=2;sp|O14950|ML12B_HUMAN Myosin regulat	actin or actin-binding cytoskeletal protein(PC00041)	6	3	3	3	2	3	2	2	1	0	3	3	3	3	2	2	1	0	2	3	2	2	1	0	3	3	3	3	2	2	1	0	2	3	2	2	1	0	3	3	3
F8W1R7;J3KND3;G8JLA2;G3V1V0;B7Z6Z4;P60660-2;P60660;F8VPF3;G3V1Y7;H0YI43;F8VZU9;F8W1I5;F8W180;P14649;F8VXL3	F8W1R7;J3KND3;G8JLA2;G3V1V0;B7Z6Z4;P60660-2;P60660;F8VPF3;G3V1Y7	5;5;5;5;5;5;5;4;3;2;2;2;2;2;1	5;5;5;5;5;5;5;4;3;2;2;2;2;2;1	5;5;5;5;5;5;5;4;3;2;2;2;2;2;1	Myosin light polypeptide 6	MYL6	tr|F8W1R7|F8W1R7_HUMAN Isoform of P60660, Myosin light polypeptide 6 OS=Homo sapiens OX=9606 GN=MYL6 PE=1 SV=1;tr|J3KND3|J3KND3_HUMAN Isoform of P60660, Myosin light polypeptide 6 OS=Homo sapiens OX=9606 GN=MYL6 PE=1 SV=1;tr|G8JLA2|G8JLA2_HUMAN Isoform of	actin or actin-binding cytoskeletal protein(PC00041)	15	5	5	5	3	5	2	1	2	0	4	4	4	5	2	3	2	4	3	5	2	1	2	0	4	4	4	5	2	3	2	4	3	5	2	1	2	0	4	4	4
P02647;F8W696	P02647;F8W696	12;9	12;9	12;9	Apolipoprotein A-I;Proapolipoprotein A-I;Truncated apolipoprotein A-I	APOA1	sp|P02647|APOA1_HUMAN Apolipoprotein A-I OS=Homo sapiens OX=9606 GN=APOA1 PE=1 SV=1;tr|F8W696|F8W696_HUMAN Isoform of P02647, Apolipoprotein A-I OS=Homo sapiens OX=9606 GN=APOA1 PE=1 SV=1	aldolase(PC00044)	2	12	12	12	2	2	3	1	1	0	2	1	2	2	12	10	9	8	2	2	3	1	1	0	2	1	2	2	12	10	9	8	2	2	3	1	1	0	2	1	2
P59666;P59665	P59666;P59665	2;2	2;2	2;2	Neutrophil defensin 3;HP 3-56;Neutrophil defensin 2;Neutrophil defensin 1;HP 1-56;Neutrophil defensin 2	DEFA3;DEFA1	sp|P59666|DEF3_HUMAN Neutrophil defensin 3 OS=Homo sapiens OX=9606 GN=DEFA3 PE=1 SV=1;sp|P59665|DEF1_HUMAN Neutrophil defensin 1 OS=Homo sapiens OX=9606 GN=DEFA1B PE=1 SV=1	antimicrobial response protein(PC00051)	2	2	2	2	1	1	1	2	1	0	2	1	1	1	1	1	1	0	1	1	1	2	1	0	2	1	1	1	1	1	1	0	1	1	1	2	1	0	2	1	1
P25311;C9JEV0	P25311;C9JEV0	3;2	3;2	3;2	Zinc-alpha-2-glycoprotein	AZGP1	sp|P25311|ZA2G_HUMAN Zinc-alpha-2-glycoprotein OS=Homo sapiens OX=9606 GN=AZGP1 PE=1 SV=2;tr|C9JEV0|C9JEV0_HUMAN Isoform of P25311, Zinc-alpha-2-glycoprotein OS=Homo sapiens OX=9606 GN=AZGP1 PE=1 SV=1	apolipoprotein(PC00052)	2	3	3	3	1	2	1	1	1	0	2	3	3	2	2	1	3	1	1	2	1	1	1	0	2	3	3	2	2	1	3	1	1	2	1	1	1	0	2	3	3
V9GYE3;V9GYG9;V9GYM3;P02652;V9GYC1;V9GYS1	V9GYE3;V9GYG9;V9GYM3;P02652;V9GYC1;V9GYS1	3;3;3;3;2;2	3;3;3;3;2;2	3;3;3;3;2;2	Apolipoprotein A-II;Proapolipoprotein A-II;Truncated apolipoprotein A-II	APOA2	tr|V9GYE3|V9GYE3_HUMAN Isoform of P02652, Apolipoprotein A-II OS=Homo sapiens OX=9606 GN=APOA2 PE=1 SV=1;tr|V9GYG9|V9GYG9_HUMAN Isoform of P02652, Apolipoprotein A-II (Fragment) OS=Homo sapiens OX=9606 GN=APOA2 PE=1 SV=1;tr|V9GYM3|V9GYM3_HUMAN Isoform of P	apolipoprotein(PC00052)	6	3	3	3	1	1	1	0	0	1	2	0	1	1	3	2	1	1	1	1	1	0	0	1	2	0	1	1	3	2	1	1	1	1	1	0	0	1	2	0	1
P06702	P06702	2	2	2	Protein S100-A9	S100A9	sp|P06702|S10A9_HUMAN Protein S100-A9 OS=Homo sapiens OX=9606 GN=S100A9 PE=1 SV=1	calmodulin-related(PC00061)	1	2	2	2	1	1	2	1	1	2	2	1	1	2	0	0	0	0	1	1	2	1	1	2	2	1	1	2	0	0	0	0	1	1	2	1	1	2	2	1	1
P05109	P05109	3	3	3	Protein S100-A8;Protein S100-A8, N-terminally processed	S100A8	sp|P05109|S10A8_HUMAN Protein S100-A8 OS=Homo sapiens OX=9606 GN=S100A8 PE=1 SV=1	calmodulin-related(PC00061)	1	3	3	3	2	2	2	1	0	2	3	1	1	3	0	0	1	1	2	2	2	1	0	2	3	1	1	3	0	0	1	1	2	2	2	1	0	2	3	1	1
P31151;Q86SG5	P31151;Q86SG5	3;2	3;2	3;2	Protein S100-A7;Protein S100-A7A	S100A7;S100A7A	sp|P31151|S10A7_HUMAN Protein S100-A7 OS=Homo sapiens OX=9606 GN=S100A7 PE=1 SV=4;sp|Q86SG5|S1A7A_HUMAN Protein S100-A7A OS=Homo sapiens OX=9606 GN=S100A7A PE=1 SV=3	calmodulin-related(PC00061)	2	3	3	3	2	1	2	0	1	1	3	0	0	3	0	0	0	0	2	1	2	0	1	1	3	0	0	3	0	0	0	0	2	1	2	0	1	1	3	0	0
P62937;P62937-2;F8WE65;C9J5S7;A0A7I2V4V1;P0DN26;A0A0H2UH34;A0A0B4J2A2;A0A075B767;A0A075B759;Q9Y536;F5H284	P62937;P62937-2;F8WE65;C9J5S7	4;3;2;2;1;1;1;1;1;1;1;1	4;3;2;2;1;1;1;1;1;1;1;1	4;3;2;2;1;1;1;1;1;1;1;1	Peptidyl-prolyl cis-trans isomerase A;Peptidyl-prolyl cis-trans isomerase A, N-terminally processed;Peptidyl-prolyl cis-trans isomerase	PPIA	sp|P62937|PPIA_HUMAN Peptidyl-prolyl cis-trans isomerase A OS=Homo sapiens OX=9606 GN=PPIA PE=1 SV=2;sp|P62937-2|PPIA-2_HUMAN Isoform of P62937, Isoform 2 of Peptidyl-prolyl cis-trans isomerase A OS=Homo sapiens OX=9606 GN=PPIA PE=1 SV=2;tr|F8WE65|F8WE65_H	chaperone(PC00072)	12	4	4	4	3	3	3	4	2	2	3	3	3	4	3	2	2	2	3	3	3	4	2	2	3	3	3	4	3	2	2	2	3	3	3	4	2	2	3	3	3
P02776	P02776	6	6	4	Platelet factor 4;Platelet factor 4, short form	PF4	sp|P02776|PLF4_HUMAN Platelet factor 4 OS=Homo sapiens OX=9606 GN=PF4 PE=1 SV=2	chemokine(PC00074)	1	6	6	4	2	3	3	2	4	2	4	6	4	5	2	3	5	3	2	3	3	2	4	2	4	6	4	5	2	3	5	3	1	2	1	1	3	1	3	4	3
P02775	P02775	6	6	6	Platelet basic protein;Connective tissue-activating peptide III;TC-2;Connective tissue-activating peptide III(1-81);Beta-thromboglobulin;Neutrophil-activating peptide 2(74);Neutrophil-activating peptide 2(73);Neutrophil-activating peptide 2;TC-1;Neutrophil-activating peptide 2(1-66);Neutrophil-activating peptide 2(1-63)	PPBP	sp|P02775|CXCL7_HUMAN Platelet basic protein OS=Homo sapiens OX=9606 GN=PPBP PE=1 SV=3	chemokine(PC00074)	1	6	6	6	5	5	6	6	6	3	6	6	6	5	5	6	6	5	5	5	6	6	6	3	6	6	6	5	5	6	6	5	5	5	6	6	6	3	6	6	6
P14174	P14174	2	2	2	Macrophage migration inhibitory factor	MIF	sp|P14174|MIF_HUMAN Macrophage migration inhibitory factor OS=Homo sapiens OX=9606 GN=MIF PE=1 SV=4	decarboxylase(PC00089)	1	2	2	2	2	2	1	1	1	0	1	1	1	2	1	1	0	2	2	2	1	1	1	0	1	1	1	2	1	1	0	2	2	2	1	1	1	0	1	1	1
A0A5F9ZHM4;P07195;A8MW50;A0A3B3IS95;F5H793;C9J7H8;F5H5G7;F5H155;A0A087WUM2;G3XAP5;F5H245;P00338-5;P00338-2;Q6ZMR3;P07864	A0A5F9ZHM4;P07195;A8MW50;A0A3B3IS95;F5H793;C9J7H8	4;4;3;3;2;2;1;1;1;1;1;1;1;1;1	4;4;3;3;2;2;1;1;1;1;1;1;1;1;1	3;3;2;2;2;2;0;0;0;0;0;0;0;0;0	L-lactate dehydrogenase B chain;L-lactate dehydrogenase	LDHB	tr|A0A5F9ZHM4|A0A5F9ZHM4_HUMAN Isoform of P07195, L-lactate dehydrogenase OS=Homo sapiens OX=9606 GN=LDHB PE=1 SV=1;sp|P07195|LDHB_HUMAN L-lactate dehydrogenase B chain OS=Homo sapiens OX=9606 GN=LDHB PE=1 SV=2;tr|A8MW50|A8MW50_HUMAN Isoform of P07195, L-l	dehydrogenase(PC00092)	15	4	4	3	3	4	4	1	2	0	4	4	4	4	1	4	4	3	3	4	4	1	2	0	4	4	4	4	1	4	4	3	2	3	3	1	1	0	3	3	3
P04406;E7EUT5;P04406-2;O14556	P04406;E7EUT5;P04406-2	9;8;8;1	9;8;8;1	9;8;8;1	Glyceraldehyde-3-phosphate dehydrogenase	GAPDH	sp|P04406|G3P_HUMAN Glyceraldehyde-3-phosphate dehydrogenase OS=Homo sapiens OX=9606 GN=GAPDH PE=1 SV=3;tr|E7EUT5|E7EUT5_HUMAN Isoform of P04406, Glyceraldehyde-3-phosphate dehydrogenase OS=Homo sapiens OX=9606 GN=GAPDH PE=1 SV=1;sp|P04406-2|G3P-2_HUMAN Is	dehydrogenase(PC00092)	4	9	9	9	7	7	8	6	6	4	8	6	7	7	6	5	6	7	7	7	8	6	6	4	8	6	7	7	6	5	6	7	7	7	8	6	6	4	8	6	7
Q7KZ85;Q7KZ85-2;Q7KZ85-3	Q7KZ85;Q7KZ85-2;Q7KZ85-3	2;1;1	2;1;1	2;1;1	Transcription elongation factor SPT6	SUPT6H	sp|Q7KZ85|SPT6H_HUMAN Transcription elongation factor SPT6 OS=Homo sapiens OX=9606 GN=SUPT6H PE=1 SV=2;sp|Q7KZ85-2|SPT6H-2_HUMAN Isoform of Q7KZ85, Isoform 2 of Transcription elongation factor SPT6 OS=Homo sapiens OX=9606 GN=SUPT6H PE=1 SV=2;sp|Q7KZ85-3|SP	general transcription factor(PC00259)	3	2	2	2	2	2	2	2	2	2	2	1	1	1	2	1	2	2	2	2	2	2	2	2	2	1	1	1	2	1	2	2	2	2	2	2	2	2	2	1	1
Q5QNW6;P06899;Q5QNW6-2;Q96A08;O60814;Q99880;Q99879;Q99877;Q93079;U3KQK0;Q16778;P62807;P58876;P57053;P33778;P23527;Q8N257;A0A2R8Y619	Q5QNW6;P06899;Q5QNW6-2;Q96A08;O60814;Q99880;Q99879;Q99877;Q93079;U3KQK0;Q16778;P62807;P58876;P57053;P33778;P23527;Q8N257	3;3;3;3;3;3;3;3;3;3;3;3;3;3;3;3;2;1	3;3;3;3;3;3;3;3;3;3;3;3;3;3;3;3;2;1	3;3;3;3;3;3;3;3;3;3;3;3;3;3;3;3;2;1	Histone H2B type 2-F;Histone H2B type 1-J;Histone H2B type 1-A;Histone H2B type 1-K;Histone H2B type 1-L;Histone H2B type 1-M;Histone H2B type 1-N;Histone H2B type 1-H;Histone H2B;Histone H2B type 2-E;Histone H2B type 1-C/E/F/G/I;Histone H2B type 1-D;Histone H2B type F-S;Histone H2B type 1-B;Histone H2B type 1-O;Histone H2B type 3-B	HIST2H2BF;HIST1H2BJ;HIST1H2BA;HIST1H2BK;HIST1H2BL;HIST1H2BM;HIST1H2BN;HIST1H2BH;HIST2H2BE;HIST1H2BC;HIST1H2BD;H2BFS;HIST1H2BB;HIST1H2BO;HIST3H2BB	sp|Q5QNW6|H2B2F_HUMAN Histone H2B type 2-F OS=Homo sapiens OX=9606 GN=H2BC18 PE=1 SV=3;sp|P06899|H2B1J_HUMAN Histone H2B type 1-J OS=Homo sapiens OX=9606 GN=H2BC11 PE=1 SV=3;sp|Q5QNW6-2|H2B2F-2_HUMAN Isoform of Q5QNW6, Isoform 2 of Histone H2B type 2-F OS=	histone(PC00118)	18	3	3	3	1	1	1	1	1	1	1	1	3	2	1	1	1	1	1	1	1	1	1	1	1	1	3	2	1	1	1	1	1	1	1	1	1	1	1	1	3
Q5TEC6;K7EMV3;K7EP01;A0A590UJJ6;B4DEB1;K7EK07;K7ES00;Q6NXT2;Q71DI3;Q16695;P84243;P68431;A0A590UJL8	Q5TEC6;K7EMV3;K7EP01;A0A590UJJ6;B4DEB1;K7EK07;K7ES00;Q6NXT2;Q71DI3;Q16695;P84243;P68431	3;2;2;2;2;2;2;2;2;2;2;2;1	3;2;2;2;2;2;2;2;2;2;2;2;1	3;2;2;2;2;2;2;2;2;2;2;2;1	Histone H3;Histone H3.3C;Histone H3.2;Histone H3.1t;Histone H3.3;Histone H3.1	HIST2H3PS2;H3F3B;H3F3A;H3F3C;HIST2H3A;HIST3H3;HIST1H3A	sp|Q5TEC6|H3PS2_HUMAN Histone HIST2H3PS2 OS=Homo sapiens OX=9606 GN=H3-2 PE=1 SV=1;tr|K7EMV3|K7EMV3_HUMAN Isoform of P84243, Histone H3 OS=Homo sapiens OX=9606 GN=H3-3B PE=1 SV=1;tr|K7EP01|K7EP01_HUMAN Isoform of P84243, Histone H3.3 OS=Homo sapiens OX=960	histone(PC00118)	13	3	3	3	2	2	3	2	1	1	3	3	3	3	3	2	3	3	2	2	3	2	1	1	3	3	3	3	3	2	3	3	2	2	3	2	1	1	3	3	3
P62805	P62805	5	5	5	Histone H4	HIST1H4A	sp|P62805|H4_HUMAN Histone H4 OS=Homo sapiens OX=9606 GN=H4-16 PE=1 SV=2	histone(PC00118)	1	5	5	5	5	5	5	5	5	4	4	4	4	5	5	5	5	5	5	5	5	5	5	4	4	4	4	5	5	5	5	5	5	5	5	5	5	4	4	4	4
P08238;Q14568;Q58FF8	P08238	7;2;2	7;2;2	3;0;0	Heat shock protein HSP 90-beta	HSP90AB1	sp|P08238|HS90B_HUMAN Heat shock protein HSP 90-beta OS=Homo sapiens OX=9606 GN=HSP90AB1 PE=1 SV=4	Hsp90 family chaperone(PC00028)	3	7	7	3	5	7	7	6	3	1	5	5	6	7	2	6	4	5	5	7	7	6	3	1	5	5	6	7	2	6	4	5	3	3	3	3	1	0	3	2	3
P01833	P01833	12	12	12	Polymeric immunoglobulin receptor;Secretory component	PIGR	sp|P01833|PIGR_HUMAN Polymeric immunoglobulin receptor OS=Homo sapiens OX=9606 GN=PIGR PE=1 SV=4	immunoglobulin receptor superfamily(PC00124)	1	12	12	12	9	4	3	4	7	12	2	1	4	4	1	0	1	3	9	4	3	4	7	12	2	1	4	4	1	0	1	3	9	4	3	4	7	12	2	1	4
A0A075B6I9	A0A075B6I9	2	2	1		IGLV7-46	sp|A0A075B6I9|LV746_HUMAN Immunoglobulin lambda variable 7-46 OS=Homo sapiens OX=9606 GN=IGLV7-46 PE=3 SV=4	immunoglobulin(PC00123)	1	2	2	1	2	2	2	2	2	2	2	2	2	1	2	2	2	2	2	2	2	2	2	2	2	2	2	1	2	2	2	2	1	1	1	1	1	1	1	1	1
A0A0B4J1X5;A0A0J9YVY3	A0A0B4J1X5	6;1	2;0	1;0		IGHV3-74	sp|A0A0B4J1X5|HV374_HUMAN Immunoglobulin heavy variable 3-74 OS=Homo sapiens OX=9606 GN=IGHV3-74 PE=3 SV=1	immunoglobulin(PC00123)	2	6	2	1	6	6	5	6	5	5	6	5	5	6	6	4	6	6	2	2	2	2	2	2	2	2	2	2	2	1	2	2	1	1	1	1	1	1	1	1	1
A0A0C4DH24	A0A0C4DH24	3	3	1		IGKV6-21	sp|A0A0C4DH24|KV621_HUMAN Immunoglobulin kappa variable 6-21 OS=Homo sapiens OX=9606 GN=IGKV6-21 PE=3 SV=1	immunoglobulin(PC00123)	1	3	3	1	3	3	3	3	1	3	3	2	3	3	2	2	2	3	3	3	3	3	1	3	3	2	3	3	2	2	2	3	1	1	1	1	0	1	1	1	1
A0A0C4DH38	A0A0C4DH38	3	3	1		IGHV5-51	sp|A0A0C4DH38|HV551_HUMAN Immunoglobulin heavy variable 5-51 OS=Homo sapiens OX=9606 GN=IGHV5-51 PE=3 SV=1	immunoglobulin(PC00123)	1	3	3	1	2	2	2	2	3	3	2	2	2	2	2	2	2	3	2	2	2	2	3	3	2	2	2	2	2	2	2	3	1	1	1	1	1	1	1	1	1
P01700	P01700	3	3	1	Ig lambda chain V-I region HA		sp|P01700|LV147_HUMAN Immunoglobulin lambda variable 1-47 OS=Homo sapiens OX=9606 GN=IGLV1-47 PE=1 SV=2	immunoglobulin(PC00123)	1	3	3	1	2	2	2	2	3	2	2	2	2	2	2	2	3	2	2	2	2	2	3	2	2	2	2	2	2	2	3	2	1	1	1	1	1	1	1	1	1
P01717	P01717	4	3	1	Ig lambda chain V-IV region Hil		sp|P01717|LV325_HUMAN Immunoglobulin lambda variable 3-25 OS=Homo sapiens OX=9606 GN=IGLV3-25 PE=1 SV=2	immunoglobulin(PC00123)	1	4	3	1	4	4	4	4	4	4	4	4	4	3	4	3	2	3	3	3	3	3	3	3	3	3	3	2	3	3	2	3	1	1	1	1	1	1	1	1	1
A0A075B6J9	A0A075B6J9	3	3	2		IGLV2-18	sp|A0A075B6J9|LV218_HUMAN Immunoglobulin lambda variable 2-18 OS=Homo sapiens OX=9606 GN=IGLV2-18 PE=3 SV=2	immunoglobulin(PC00123)	1	3	3	2	2	1	3	2	2	2	2	3	3	2	2	1	2	2	2	1	3	2	2	2	2	3	3	2	2	1	2	2	1	1	2	2	2	1	2	2	2
A0A075B6K5;A0A075B6K2	A0A075B6K5	4;1	2;0	2;0		IGLV3-9	sp|A0A075B6K5|LV39_HUMAN Immunoglobulin lambda variable 3-9 OS=Homo sapiens OX=9606 GN=IGLV3-9 PE=3 SV=1	immunoglobulin(PC00123)	2	4	2	2	4	4	4	4	3	3	4	4	4	3	4	4	3	3	2	2	2	2	1	1	2	2	2	1	2	2	1	1	2	2	2	2	1	1	2	2	2
A0A075B7B8	A0A075B7B8	3	2	2		IGHV3OR16-12	tr|A0A075B7B8|A0A075B7B8_HUMAN Immunoglobulin heavy variable 3/OR16-12 (non-functional) (Fragment) OS=Homo sapiens OX=9606 GN=IGHV3OR16-12 PE=1 SV=1	immunoglobulin(PC00123)	1	3	2	2	3	3	3	2	3	3	3	3	3	2	3	2	3	3	2	2	2	1	2	2	2	2	2	1	2	1	2	2	2	2	2	1	2	2	2	2	2
A0A075B7D8	A0A075B7D8	3	2	2		IGHV3OR15-7	tr|A0A075B7D8|A0A075B7D8_HUMAN Immunoglobulin heavy variable 3/OR15-7 (pseudogene) (Fragment) OS=Homo sapiens OX=9606 GN=IGHV3OR15-7 PE=1 SV=1	immunoglobulin(PC00123)	1	3	2	2	3	2	3	2	3	3	3	2	3	2	2	3	3	2	2	1	2	1	2	2	2	1	2	1	1	2	2	1	2	1	2	1	2	2	2	1	2
A0A0A0MS15	A0A0A0MS15	4	2	2		IGHV3-49	sp|A0A0A0MS15|HV349_HUMAN Immunoglobulin heavy variable 3-49 OS=Homo sapiens OX=9606 GN=IGHV3-49 PE=3 SV=1	immunoglobulin(PC00123)	1	4	2	2	4	3	3	3	4	2	4	4	4	3	3	2	4	3	2	1	1	1	2	2	2	2	2	1	1	1	2	1	2	1	1	1	2	2	2	2	2
A0A0B4J1V6	A0A0B4J1V6	5	3	2		IGHV3-73	sp|A0A0B4J1V6|HV373_HUMAN Immunoglobulin heavy variable 3-73 OS=Homo sapiens OX=9606 GN=IGHV3-73 PE=3 SV=1	immunoglobulin(PC00123)	1	5	3	2	3	4	5	4	4	2	4	4	4	4	5	2	4	4	2	3	3	3	3	2	2	2	2	2	3	1	3	3	1	2	2	2	2	2	1	1	1
A0A0B4J1Y8	A0A0B4J1Y8	2	2	2		IGLV9-49	sp|A0A0B4J1Y8|LV949_HUMAN Immunoglobulin lambda variable 9-49 OS=Homo sapiens OX=9606 GN=IGLV9-49 PE=1 SV=1	immunoglobulin(PC00123)	1	2	2	2	0	1	1	2	0	1	1	2	1	1	1	1	1	2	0	1	1	2	0	1	1	2	1	1	1	1	1	2	0	1	1	2	0	1	1	2	1
A0A0C4DH31	A0A0C4DH31	3	2	2		IGHV1-18	sp|A0A0C4DH31|HV118_HUMAN Immunoglobulin heavy variable 1-18 OS=Homo sapiens OX=9606 GN=IGHV1-18 PE=3 SV=1	immunoglobulin(PC00123)	1	3	2	2	2	2	2	2	3	2	3	3	3	2	3	2	3	3	1	1	1	1	2	1	2	2	2	1	2	1	2	2	1	1	1	1	2	1	2	2	2
A0A0C4DH43;A0A0J9YVU5	A0A0C4DH43;A0A0J9YVU5	2;1	2;1	2;1			sp|A0A0C4DH43|HV70D_HUMAN Immunoglobulin heavy variable 2-70D OS=Homo sapiens OX=9606 GN=IGHV2-70D PE=3 SV=1;tr|A0A0J9YVU5|A0A0J9YVU5_HUMAN Isoform of P01814, Immunoglobulin heavy variable 2-70 (Fragment) OS=Homo sapiens OX=9606 GN=IGHV2-70 PE=1 SV=1	immunoglobulin(PC00123)	2	2	2	2	1	1	0	2	2	2	2	1	1	1	1	1	1	2	1	1	0	2	2	2	2	1	1	1	1	1	1	2	1	1	0	2	2	2	2	1	1
A0A0G2JMB2;A0A286YEY5;P01877	A0A0G2JMB2;A0A286YEY5;P01877	8;5;5	2;1;1	2;1;1	Ig alpha-2 chain C region	IGHA2	tr|A0A0G2JMB2|A0A0G2JMB2_HUMAN Isoform of P01877, Immunoglobulin heavy constant alpha 2 (Fragment) OS=Homo sapiens OX=9606 GN=IGHA2 PE=1 SV=1;tr|A0A286YEY5|A0A286YEY5_HUMAN Isoform of P01877, Immunoglobulin heavy constant alpha 2 (Fragment) OS=Homo sapiens	immunoglobulin(PC00123)	3	8	2	2	7	6	7	6	6	7	7	8	5	7	8	6	6	7	2	1	2	1	1	1	2	2	1	2	2	2	1	2	2	1	2	1	1	1	2	2	1
A0A0G2JRQ6	A0A0G2JRQ6	2	2	2			tr|A0A0G2JRQ6|A0A0G2JRQ6_HUMAN Ig-like domain-containing protein (Fragment) OS=Homo sapiens OX=9606 PE=1 SV=4	immunoglobulin(PC00123)	1	2	2	2	2	2	2	2	2	2	2	2	2	2	2	2	2	2	2	2	2	2	2	2	2	2	2	2	2	2	2	2	2	2	2	2	2	2	2	2	2
A0A0G2JSC0;A0A087WSX0	A0A0G2JSC0;A0A087WSX0	4;3	4;3	2;2		IGLV5-45	tr|A0A0G2JSC0|A0A0G2JSC0_HUMAN Isoform of A0A087WSX0, Immunoglobulin lambda variable 5-45 (Fragment) OS=Homo sapiens OX=9606 GN=IGLV5-45 PE=1 SV=1;sp|A0A087WSX0|LV545_HUMAN Immunoglobulin lambda variable 5-45 OS=Homo sapiens OX=9606 GN=IGLV5-45 PE=3 SV=1	immunoglobulin(PC00123)	2	4	4	2	3	3	4	2	3	3	3	4	3	3	4	1	2	2	3	3	4	2	3	3	3	4	3	3	4	1	2	2	1	1	2	1	1	1	1	2	1
A0A0J9YY99;P0DP03;P01768;P01764	A0A0J9YY99;P0DP03;P01768;P01764	7;6;6;4	6;5;5;3	2;1;1;1	Ig heavy chain V-III region CAM;Ig heavy chain V-III region 23	IGHV3-23	tr|A0A0J9YY99|A0A0J9YY99_HUMAN Ig-like domain-containing protein (Fragment) OS=Homo sapiens OX=9606 PE=1 SV=1;sp|P0DP03|HVC05_HUMAN Immunoglobulin heavy variable 3-30-5 OS=Homo sapiens OX=9606 GN=IGHV3-30-5 PE=3 SV=1;sp|P01768|HV330_HUMAN Immunoglobulin he	immunoglobulin(PC00123)	4	7	6	2	5	5	6	5	5	6	6	4	5	5	5	4	6	6	4	4	5	4	4	6	5	3	4	4	4	4	5	5	1	1	2	1	1	2	2	1	1
A0A4W8ZXM2;A0A0B4J1Y9	A0A4W8ZXM2;A0A0B4J1Y9	6;5	5;4	2;2		IGHV3-72	tr|A0A4W8ZXM2|A0A4W8ZXM2_HUMAN Isoform of A0A0B4J1Y9, Immunoglobulin heavy variable 3-72 OS=Homo sapiens OX=9606 GN=IGHV3-72 PE=1 SV=1;sp|A0A0B4J1Y9|HV372_HUMAN Immunoglobulin heavy variable 3-72 OS=Homo sapiens OX=9606 GN=IGHV3-72 PE=3 SV=1	immunoglobulin(PC00123)	2	6	5	2	5	5	6	5	5	4	6	6	6	6	6	5	5	4	4	4	5	4	4	4	5	5	5	5	5	5	4	3	2	2	2	2	2	2	2	2	2
A0A5H1ZRS9;A2NJV5;A0A075B6S2;A0A0A0MRZ7	A0A5H1ZRS9;A2NJV5;A0A075B6S2;A0A0A0MRZ7	4;3;3;2	2;1;1;0	2;1;1;0		IGKV A18;IGKV2D-29;IGKV2D-26	tr|A0A5H1ZRS9|A0A5H1ZRS9_HUMAN Isoform of A0A075B6S2, Immunoglobulin kappa variable 2D-29 OS=Homo sapiens OX=9606 GN=IGKV2D-29 PE=1 SV=1;sp|A2NJV5|KV229_HUMAN Immunoglobulin kappa variable 2-29 OS=Homo sapiens OX=9606 GN=IGKV2-29 PE=3 SV=2;sp|A0A075B6S2|KV	immunoglobulin(PC00123)	4	4	2	2	3	3	3	3	4	4	3	2	4	3	3	3	3	3	1	1	1	1	2	2	1	1	2	1	1	1	1	1	1	1	1	1	2	2	1	1	2
C9JA05;D6RHJ6;D6RD17;P01591	C9JA05;D6RHJ6;D6RD17;P01591	2;2;2;2	2;2;2;2	2;2;2;2	Immunoglobulin J chain	JCHAIN;IGJ	tr|C9JA05|C9JA05_HUMAN Isoform of P01591, Immunoglobulin J chain (Fragment) OS=Homo sapiens OX=9606 GN=JCHAIN PE=1 SV=1;tr|D6RHJ6|D6RHJ6_HUMAN Isoform of P01591, Immunoglobulin J chain (Fragment) OS=Homo sapiens OX=9606 GN=JCHAIN PE=1 SV=1;tr|D6RD17|D6RD17	immunoglobulin(PC00123)	4	2	2	2	2	2	2	2	2	2	1	2	2	2	2	1	1	2	2	2	2	2	2	2	1	2	2	2	2	1	1	2	2	2	2	2	2	2	1	2	2
P01599	P01599	5	5	2	Ig kappa chain V-I region Gal		sp|P01599|KV117_HUMAN Immunoglobulin kappa variable 1-17 OS=Homo sapiens OX=9606 GN=IGKV1-17 PE=1 SV=2	immunoglobulin(PC00123)	1	5	5	2	4	4	4	3	5	4	4	5	5	5	3	3	4	3	4	4	4	3	5	4	4	5	5	5	3	3	4	3	2	2	2	2	2	2	2	2	2
P01602	P01602	2	2	2	Ig kappa chain V-I region HK102	IGKV1-5	sp|P01602|KV105_HUMAN Immunoglobulin kappa variable 1-5 OS=Homo sapiens OX=9606 GN=IGKV1-5 PE=1 SV=2	immunoglobulin(PC00123)	1	2	2	2	1	2	1	1	1	1	1	1	1	1	1	1	2	1	1	2	1	1	1	1	1	1	1	1	1	1	2	1	1	2	1	1	1	1	1	1	1
P01705	P01705	2	2	2	Ig lambda chain V-II region NEI		sp|P01705|LV223_HUMAN Immunoglobulin lambda variable 2-23 OS=Homo sapiens OX=9606 GN=IGLV2-23 PE=1 SV=2	immunoglobulin(PC00123)	1	2	2	2	0	0	1	1	1	0	1	1	2	0	2	1	0	1	0	0	1	1	1	0	1	1	2	0	2	1	0	1	0	0	1	1	1	0	1	1	2
P01709	P01709	2	2	2	Ig lambda chain V-II region MGC		sp|P01709|LV208_HUMAN Immunoglobulin lambda variable 2-8 OS=Homo sapiens OX=9606 GN=IGLV2-8 PE=1 SV=2	immunoglobulin(PC00123)	1	2	2	2	0	1	1	1	0	1	1	1	1	0	0	0	1	1	0	1	1	1	0	1	1	1	1	0	0	0	1	1	0	1	1	1	0	1	1	1	1
P01817	P01817	2	2	2	Ig heavy chain V-II region MCE		sp|P01817|HV205_HUMAN Immunoglobulin heavy variable 2-5 OS=Homo sapiens OX=9606 GN=IGHV2-5 PE=1 SV=2	immunoglobulin(PC00123)	1	2	2	2	1	1	2	1	1	2	1	1	1	1	1	1	1	2	1	1	2	1	1	2	1	1	1	1	1	1	1	2	1	1	2	1	1	2	1	1	1
P06310	P06310	3	2	2	Ig kappa chain V-II region RPMI 6410		sp|P06310|KV230_HUMAN Immunoglobulin kappa variable 2-30 OS=Homo sapiens OX=9606 GN=IGKV2-30 PE=3 SV=2	immunoglobulin(PC00123)	1	3	2	2	2	2	3	3	3	3	3	3	3	3	3	3	2	3	1	1	2	2	2	2	2	2	2	2	2	2	1	2	1	1	2	2	2	2	2	2	2
P0DOY3	P0DOY3	13	13	2			sp|P0DOY3|IGLC3_HUMAN Immunoglobulin lambda constant 3 OS=Homo sapiens OX=9606 GN=IGLC3 PE=1 SV=1	immunoglobulin(PC00123)	1	13	13	2	12	12	13	12	9	11	10	10	7	12	7	8	10	8	12	12	13	12	9	11	10	10	7	12	7	8	10	8	1	1	2	1	1	1	0	0	0
P0DP09;A0A0B4J2D9	P0DP09;A0A0B4J2D9	2;2	2;2	2;2		IGKV1D-13	sp|P0DP09|KV113_HUMAN Immunoglobulin kappa variable 1-13 OS=Homo sapiens OX=9606 GN=IGKV1-13 PE=3 SV=1;sp|A0A0B4J2D9|KVD13_HUMAN Immunoglobulin kappa variable 1D-13 OS=Homo sapiens OX=9606 GN=IGKV1D-13 PE=3 SV=1	immunoglobulin(PC00123)	2	2	2	2	0	1	1	1	1	1	1	1	1	0	1	1	1	2	0	1	1	1	1	1	1	1	1	0	1	1	1	2	0	1	1	1	1	1	1	1	1
A0A075B6I0	A0A075B6I0	3	3	3		IGLV8-61	sp|A0A075B6I0|LV861_HUMAN Immunoglobulin lambda variable 8-61 OS=Homo sapiens OX=9606 GN=IGLV8-61 PE=3 SV=7	immunoglobulin(PC00123)	1	3	3	3	3	3	3	3	3	3	2	3	3	3	2	2	3	3	3	3	3	3	3	3	2	3	3	3	2	2	3	3	3	3	3	3	3	3	2	3	3
A0A075B7D0	A0A075B7D0	3	3	3		IGHV1OR15-1	tr|A0A075B7D0|A0A075B7D0_HUMAN Immunoglobulin heavy variable 1/OR15-1 (non-functional) (Fragment) OS=Homo sapiens OX=9606 GN=IGHV1OR15-1 PE=1 SV=1	immunoglobulin(PC00123)	1	3	3	3	2	1	2	3	3	2	3	2	3	2	2	3	3	2	2	1	2	3	3	2	3	2	3	2	2	3	3	2	2	1	2	3	3	2	3	2	3
A0A0C4DH34	A0A0C4DH34	3	3	3		IGHV4-28	sp|A0A0C4DH34|HV428_HUMAN Immunoglobulin heavy variable 4-28 OS=Homo sapiens OX=9606 GN=IGHV4-28 PE=3 SV=1	immunoglobulin(PC00123)	1	3	3	3	2	2	3	2	3	2	3	3	3	2	3	2	3	3	2	2	3	2	3	2	3	3	3	2	3	2	3	3	2	2	3	2	3	2	3	3	3
A0A0C4DH36	A0A0C4DH36	4	3	3		IGHV3-38	sp|A0A0C4DH36|HV338_HUMAN Probable non-functional immunoglobulin heavy variable 3-38 OS=Homo sapiens OX=9606 GN=IGHV3-38 PE=1 SV=1	immunoglobulin(PC00123)	1	4	3	3	3	2	3	3	3	1	4	4	3	2	3	2	4	4	2	1	2	2	2	1	3	3	2	1	2	2	3	3	2	1	2	2	2	1	3	3	2
A0A0C4DH67;A0A0C4DH69	A0A0C4DH67;A0A0C4DH69	4;3	4;3	3;2		IGKV1-8;IGKV1-9	sp|A0A0C4DH67|KV108_HUMAN Immunoglobulin kappa variable 1-8 OS=Homo sapiens OX=9606 GN=IGKV1-8 PE=3 SV=1;sp|A0A0C4DH69|KV109_HUMAN Immunoglobulin kappa variable 1-9 OS=Homo sapiens OX=9606 GN=IGKV1-9 PE=3 SV=1	immunoglobulin(PC00123)	2	4	4	3	3	3	3	3	3	4	3	3	3	3	3	3	4	3	3	3	3	3	3	4	3	3	3	3	3	3	4	3	2	2	2	2	2	3	2	2	2
A0A5H1ZRS2;A0A075B6P5;P01615	A0A5H1ZRS2;A0A075B6P5;P01615	6;4;4	6;4;4	3;1;1	Ig kappa chain V-II region FR	IGKV2D-28	tr|A0A5H1ZRS2|A0A5H1ZRS2_HUMAN Isoform of P01615, Immunoglobulin kappa variable 2D-28 OS=Homo sapiens OX=9606 GN=IGKV2D-28 PE=1 SV=1;sp|A0A075B6P5|KV228_HUMAN Immunoglobulin kappa variable 2-28 OS=Homo sapiens OX=9606 GN=IGKV2-28 PE=3 SV=1;sp|P01615|KVD28_	immunoglobulin(PC00123)	3	6	6	3	4	4	3	4	4	5	4	3	3	4	5	5	4	5	4	4	3	4	4	5	4	3	3	4	5	5	4	5	1	1	0	2	2	2	2	0	0
P01619	P01619	6	6	3	Ig kappa chain V-III region B6		sp|P01619|KV320_HUMAN Immunoglobulin kappa variable 3-20 OS=Homo sapiens OX=9606 GN=IGKV3-20 PE=1 SV=2	immunoglobulin(PC00123)	1	6	6	3	6	6	5	6	6	5	6	6	6	6	6	6	6	6	6	6	5	6	6	5	6	6	6	6	6	6	6	6	3	3	2	3	3	3	3	3	3
P01703;A0A075B6I6	P01703	3;1	3;1	3;1	Ig lambda chain V-I region NEWM		sp|P01703|LV140_HUMAN Immunoglobulin lambda variable 1-40 OS=Homo sapiens OX=9606 GN=IGLV1-40 PE=1 SV=2	immunoglobulin(PC00123)	2	3	3	3	3	3	2	2	3	2	3	2	3	3	2	0	2	2	3	3	2	2	3	2	3	2	3	3	2	0	2	2	3	3	2	2	3	2	3	2	3
P01714	P01714	4	3	3	Ig lambda chain V-III region SH		sp|P01714|LV319_HUMAN Immunoglobulin lambda variable 3-19 OS=Homo sapiens OX=9606 GN=IGLV3-19 PE=1 SV=2	immunoglobulin(PC00123)	1	4	3	3	3	3	3	3	3	3	3	3	3	4	4	4	3	3	2	2	2	2	2	2	2	2	2	3	3	3	2	2	2	2	2	2	2	2	2	2	2
P01721	P01721	3	3	3	Ig lambda chain V-VI region AR		sp|P01721|LV657_HUMAN Immunoglobulin lambda variable 6-57 OS=Homo sapiens OX=9606 GN=IGLV6-57 PE=1 SV=2	immunoglobulin(PC00123)	1	3	3	3	1	2	3	2	1	1	2	2	2	2	3	2	2	2	1	2	3	2	1	1	2	2	2	2	3	2	2	2	1	2	3	2	1	1	2	2	2
P01742;A0A0B4J2H0	P01742;A0A0B4J2H0	4;2	4;2	3;1	Ig heavy chain V-I region EU	IGHV1-69-2	sp|P01742|HV169_HUMAN Immunoglobulin heavy variable 1-69 OS=Homo sapiens OX=9606 GN=IGHV1-69 PE=1 SV=2;sp|A0A0B4J2H0|HV69D_HUMAN Immunoglobulin heavy variable 1-69D OS=Homo sapiens OX=9606 GN=IGHV1-69D PE=1 SV=1	immunoglobulin(PC00123)	2	4	4	3	4	3	3	4	4	4	3	3	3	3	3	3	3	4	4	3	3	4	4	4	3	3	3	3	3	3	3	4	3	2	2	3	3	3	2	2	2
P01780;A0A0B4J1V1;P01763;P01762	P01780;A0A0B4J1V1;P01763;P01762	8;5;5;5	8;5;5;5	3;0;0;0	Ig heavy chain V-III region JON;Ig heavy chain V-III region WEA;Ig heavy chain V-III region TRO	IGHV3-21	sp|P01780|HV307_HUMAN Immunoglobulin heavy variable 3-7 OS=Homo sapiens OX=9606 GN=IGHV3-7 PE=1 SV=2;sp|A0A0B4J1V1|HV321_HUMAN Immunoglobulin heavy variable 3-21 OS=Homo sapiens OX=9606 GN=IGHV3-21 PE=1 SV=1;sp|P01763|HV348_HUMAN Immunoglobulin heavy varia	immunoglobulin(PC00123)	4	8	8	3	6	7	7	7	7	5	7	7	6	6	7	6	7	7	6	7	7	7	7	5	7	7	6	6	7	6	7	7	2	3	3	3	3	2	3	3	3
P23083	P23083	4	4	3	Ig heavy chain V-I region V35		sp|P23083|HV102_HUMAN Immunoglobulin heavy variable 1-2 OS=Homo sapiens OX=9606 GN=IGHV1-2 PE=1 SV=2	immunoglobulin(PC00123)	1	4	4	3	3	2	3	3	3	3	4	3	3	3	3	3	3	4	3	2	3	3	3	3	4	3	3	3	3	3	3	4	2	1	2	2	2	2	3	2	2
P80748	P80748	5	5	3	Ig lambda chain V-III region LOI		sp|P80748|LV321_HUMAN Immunoglobulin lambda variable 3-21 OS=Homo sapiens OX=9606 GN=IGLV3-21 PE=1 SV=2	immunoglobulin(PC00123)	1	5	5	3	5	5	4	5	3	5	4	5	5	5	5	5	5	5	5	5	4	5	3	5	4	5	5	5	5	5	5	5	3	3	2	3	1	3	2	3	3
A0A075B6H9	A0A075B6H9	4	4	4		IGLV4-69	sp|A0A075B6H9|LV469_HUMAN Immunoglobulin lambda variable 4-69 OS=Homo sapiens OX=9606 GN=IGLV4-69 PE=1 SV=1	immunoglobulin(PC00123)	1	4	4	4	0	0	2	0	2	0	2	3	3	0	4	0	3	2	0	0	2	0	2	0	2	3	3	0	4	0	3	2	0	0	2	0	2	0	2	3	3
A0A075B6K4	A0A075B6K4	7	7	4		IGLV3-10	sp|A0A075B6K4|LV310_HUMAN Immunoglobulin lambda variable 3-10 OS=Homo sapiens OX=9606 GN=IGLV3-10 PE=3 SV=2	immunoglobulin(PC00123)	1	7	7	4	3	3	5	3	4	2	6	5	5	3	6	3	4	2	3	3	5	3	4	2	6	5	5	3	6	3	4	2	0	0	2	0	1	0	3	2	2
A0A075B6R9;A0A0C4DH68	A0A075B6R9;A0A0C4DH68	5;4	5;4	4;3		IGKV2D-24;IGKV2-24	sp|A0A075B6R9|KVD24_HUMAN Probable non-functional immunoglobulin kappa variable 2D-24 OS=Homo sapiens OX=9606 GN=IGKV2D-24 PE=1 SV=1;sp|A0A0C4DH68|KV224_HUMAN Immunoglobulin kappa variable 2-24 OS=Homo sapiens OX=9606 GN=IGKV2-24 PE=3 SV=1	immunoglobulin(PC00123)	2	5	5	4	4	4	4	5	5	5	4	4	4	4	5	3	5	5	4	4	4	5	5	5	4	4	4	4	5	3	5	5	3	3	3	4	4	4	3	4	3
A0A0A0MRZ8;P04433	A0A0A0MRZ8;P04433	4;4	4;4	4;4	Ig kappa chain V-III region VG	IGKV3D-11	sp|A0A0A0MRZ8|KVD11_HUMAN Immunoglobulin kappa variable 3D-11 OS=Homo sapiens OX=9606 GN=IGKV3D-11 PE=3 SV=6;sp|P04433|KV311_HUMAN Immunoglobulin kappa variable 3-11 OS=Homo sapiens OX=9606 GN=IGKV3-11 PE=1 SV=1	immunoglobulin(PC00123)	2	4	4	4	3	3	3	3	3	3	3	3	4	3	3	3	3	3	3	3	3	3	3	3	3	3	4	3	3	3	3	3	3	3	3	3	3	3	3	3	4
A0A0B4J1U7	A0A0B4J1U7	4	4	4		IGHV6-1	sp|A0A0B4J1U7|HV601_HUMAN Immunoglobulin heavy variable 6-1 OS=Homo sapiens OX=9606 GN=IGHV6-1 PE=3 SV=1	immunoglobulin(PC00123)	1	4	4	4	2	2	3	3	3	2	3	3	3	2	2	3	2	3	2	2	3	3	3	2	3	3	3	2	2	3	2	3	2	2	3	3	3	2	3	3	3
A0A0B4J1V0;S4R3C0;A0A075B7F1	A0A0B4J1V0	6;1;1	4;0;0	4;0;0		IGHV3-15	sp|A0A0B4J1V0|HV315_HUMAN Immunoglobulin heavy variable 3-15 OS=Homo sapiens OX=9606 GN=IGHV3-15 PE=3 SV=1	immunoglobulin(PC00123)	3	6	4	4	5	5	5	5	4	4	6	6	6	5	6	4	5	5	4	4	3	4	3	4	4	4	4	3	4	3	4	4	4	4	3	4	3	4	4	4	4
A0A0B4J231;B9A064;A0A5H1ZRQ4;P0CG04	A0A0B4J231;B9A064;A0A5H1ZRQ4;P0CG04	11;11;10;10	4;4;3;3	4;4;3;3	Immunoglobulin lambda-like polypeptide 5;Ig lambda-1 chain C regions	IGLL5;IGLC1	tr|A0A0B4J231|A0A0B4J231_HUMAN Isoform of B9A064, Immunoglobulin lambda-like polypeptide 5 OS=Homo sapiens OX=9606 GN=IGLL5 PE=1 SV=1;sp|B9A064|IGLL5_HUMAN Immunoglobulin lambda-like polypeptide 5 OS=Homo sapiens OX=9606 GN=IGLL5 PE=2 SV=2;tr|A0A5H1ZRQ4|A0	immunoglobulin(PC00123)	4	11	4	4	9	9	11	11	11	10	9	9	8	10	8	7	9	11	3	3	4	4	4	3	3	3	3	3	3	2	3	4	3	3	4	4	4	3	3	3	3
A0A286YEY1;P01876	A0A286YEY1;P01876	10;10	10;10	4;4	Ig alpha-1 chain C region	IGHA1	tr|A0A286YEY1|A0A286YEY1_HUMAN Isoform of P01876, Immunoglobulin heavy constant alpha 1 (Fragment) OS=Homo sapiens OX=9606 GN=IGHA1 PE=1 SV=1;sp|P01876|IGHA1_HUMAN Immunoglobulin heavy constant alpha 1 OS=Homo sapiens OX=9606 GN=IGHA1 PE=1 SV=2	immunoglobulin(PC00123)	2	10	10	4	8	9	9	9	9	9	8	10	7	9	10	8	9	9	8	9	9	9	9	9	8	10	7	9	10	8	9	9	3	4	4	4	4	3	3	4	3
P01701	P01701	5	5	4	Ig lambda chain V-I region NEW		sp|P01701|LV151_HUMAN Immunoglobulin lambda variable 1-51 OS=Homo sapiens OX=9606 GN=IGLV1-51 PE=1 SV=2	immunoglobulin(PC00123)	1	5	5	4	4	4	5	5	5	5	4	5	4	4	5	5	5	5	4	4	5	5	5	5	4	5	4	4	5	5	5	5	3	3	4	4	4	4	3	4	3
P06312	P06312	4	4	4	Ig kappa chain V-IV region	IGKV4-1	sp|P06312|KV401_HUMAN Immunoglobulin kappa variable 4-1 OS=Homo sapiens OX=9606 GN=IGKV4-1 PE=1 SV=1	immunoglobulin(PC00123)	1	4	4	4	4	4	4	4	4	4	4	4	4	4	4	4	3	3	4	4	4	4	4	4	4	4	4	4	4	4	3	3	4	4	4	4	4	4	4	4	4
P06331;P0DP08;P0DP06;A0A0C4DH41;P01825;P01824;A0A0J9YWU9	P06331;P0DP08;P0DP06;A0A0C4DH41;P01825;P01824;A0A0J9YWU9	5;4;4;4;4;4;3	5;4;4;4;4;4;3	4;3;3;3;3;3;3	Ig heavy chain V-II region ARH-77;Ig heavy chain V-II region NEWM;Ig heavy chain V-II region WAH	IGHV4-61	sp|P06331|HV434_HUMAN Immunoglobulin heavy variable 4-34 OS=Homo sapiens OX=9606 GN=IGHV4-34 PE=1 SV=2;sp|P0DP08|HVD82_HUMAN Immunoglobulin heavy variable 4-38-2 OS=Homo sapiens OX=9606 GN=IGHV4-38-2 PE=3 SV=1;sp|P0DP06|HVD34_HUMAN Immunoglobulin heavy var	immunoglobulin(PC00123)	7	5	5	4	5	4	4	5	4	4	5	4	5	2	5	4	5	4	5	4	4	5	4	4	5	4	5	2	5	4	5	4	4	3	3	4	3	3	4	3	4
A0A286YES1;A0A4W9A917;P01860	A0A286YES1;A0A4W9A917;P01860	25;25;25	7;7;7	7;7;7	Ig gamma-3 chain C region	IGHG3	tr|A0A286YES1|A0A286YES1_HUMAN Isoform of P01860, Immunoglobulin heavy constant gamma 3 (Fragment) OS=Homo sapiens OX=9606 GN=IGHG3 PE=1 SV=1;tr|A0A4W9A917|A0A4W9A917_HUMAN Isoform of P01860, Immunoglobulin heavy constant gamma 3 (Fragment) OS=Homo sapiens	immunoglobulin(PC00123)	3	25	7	7	19	23	21	22	23	20	20	22	22	21	22	18	20	21	5	6	5	5	6	5	5	7	6	5	6	5	5	5	5	6	5	5	6	5	5	7	6
A0A286YFJ8;P01861	A0A286YFJ8;P01861	19;19	10;10	10;10	Ig gamma-4 chain C region	IGHG4	tr|A0A286YFJ8|A0A286YFJ8_HUMAN Isoform of P01861, Immunoglobulin heavy constant gamma 4 (Fragment) OS=Homo sapiens OX=9606 GN=IGHG4 PE=1 SV=1;sp|P01861|IGHG4_HUMAN Immunoglobulin heavy constant gamma 4 OS=Homo sapiens OX=9606 GN=IGHG4 PE=1 SV=1	immunoglobulin(PC00123)	2	19	10	10	14	13	15	15	15	15	15	19	16	15	16	13	14	16	5	5	6	6	7	6	7	10	7	7	7	6	6	7	5	5	6	6	7	6	7	10	7
P01871;P01871-2	P01871;P01871-2	11;11	11;11	11;11	Ig mu chain C region	IGHM	sp|P01871|IGHM_HUMAN Immunoglobulin heavy constant mu OS=Homo sapiens OX=9606 GN=IGHM PE=1 SV=4;sp|P01871-2|IGHM-2_HUMAN Isoform of P01871, Isoform 2 of Immunoglobulin heavy constant mu OS=Homo sapiens OX=9606 GN=IGHM PE=1 SV=4	immunoglobulin(PC00123)	2	11	11	11	8	6	11	8	10	8	10	10	9	8	10	11	9	9	8	6	11	8	10	8	10	10	9	8	10	11	9	9	8	6	11	8	10	8	10	10	9
A0A286YEY4;P01859	A0A286YEY4;P01859	28;28	19;19	13;13	Ig gamma-2 chain C region	IGHG2	tr|A0A286YEY4|A0A286YEY4_HUMAN Isoform of P01859, Immunoglobulin heavy constant gamma 2 (Fragment) OS=Homo sapiens OX=9606 GN=IGHG2 PE=1 SV=1;sp|P01859|IGHG2_HUMAN Immunoglobulin heavy constant gamma 2 OS=Homo sapiens OX=9606 GN=IGHG2 PE=1 SV=2	immunoglobulin(PC00123)	2	28	19	13	19	24	25	23	25	21	26	23	23	21	23	23	25	25	12	15	18	15	16	13	17	15	15	13	14	15	16	16	9	9	12	9	10	8	11	10	9
P01857;A0A0A0MS08;A0A0A0MS07	P01857;A0A0A0MS08;A0A0A0MS07	33;33;28	33;33;28	16;16;13	Ig gamma-1 chain C region	IGHG1	sp|P01857|IGHG1_HUMAN Immunoglobulin heavy constant gamma 1 OS=Homo sapiens OX=9606 GN=IGHG1 PE=1 SV=1;tr|A0A0A0MS08|A0A0A0MS08_HUMAN Isoform of P01857, Immunoglobulin heavy constant gamma 1 (Fragment) OS=Homo sapiens OX=9606 GN=IGHG1 PE=1 SV=1;tr|A0A0A0MS	immunoglobulin(PC00123)	3	33	33	16	29	28	24	26	25	29	24	23	24	28	27	21	26	30	29	28	24	26	25	29	24	23	24	28	27	21	26	30	14	12	10	10	10	14	10	9	10
P01834;A0A5H1ZRQ3	P01834;A0A5H1ZRQ3	17;13	17;13	17;13	Ig kappa chain C region	IGKC	sp|P01834|IGKC_HUMAN Immunoglobulin kappa constant OS=Homo sapiens OX=9606 GN=IGKC PE=1 SV=2;tr|A0A5H1ZRQ3|A0A5H1ZRQ3_HUMAN Isoform of P01834, Immunoglobulin kappa constant (Fragment) OS=Homo sapiens OX=9606 GN=IGKC PE=1 SV=1	immunoglobulin(PC00123)	2	17	17	17	14	16	14	13	10	15	14	12	12	14	12	11	11	12	14	16	14	13	10	15	14	12	12	14	12	11	11	12	14	16	14	13	10	15	14	12	12
H3BM21;P05106-2;P05106-3;P05106;I3L4X8	H3BM21;P05106-2;P05106-3;P05106;I3L4X8	4;4;4;4;2	4;4;4;4;2	4;4;4;4;2	Integrin beta;Integrin beta-3	ITGB3	tr|H3BM21|H3BM21_HUMAN readthrough, Integrin beta (Fragment) OS=Homo sapiens OX=9606 PE=3 SV=1;sp|P05106-2|ITB3-2_HUMAN Isoform of P05106, Isoform Beta-3B of Integrin beta-3 OS=Homo sapiens OX=9606 GN=ITGB3 PE=1 SV=2;sp|P05106-3|ITB3-3_HUMAN Isoform of P05	integrin(PC00126)	5	4	4	4	2	4	1	2	1	0	3	3	2	4	3	2	2	2	2	4	1	2	1	0	3	3	2	4	3	2	2	2	2	4	1	2	1	0	3	3	2
P08514-3;P08514-2;P08514;A0A3B3IU79	P08514-3;P08514-2;P08514;A0A3B3IU79	10;10;10;6	10;10;10;6	10;10;10;6	Integrin alpha-IIb;Integrin alpha-IIb heavy chain;Integrin alpha-IIb light chain, form 1;Integrin alpha-IIb light chain, form 2	ITGA2B	sp|P08514-3|ITA2B-3_HUMAN Isoform of P08514, Isoform 3 of Integrin alpha-IIb OS=Homo sapiens OX=9606 GN=ITGA2B PE=1 SV=3;sp|P08514-2|ITA2B-2_HUMAN Isoform of P08514, Isoform 2 of Integrin alpha-IIb OS=Homo sapiens OX=9606 GN=ITGA2B PE=1 SV=3;sp|P08514|ITA2	integrin(PC00126)	4	10	10	10	8	7	8	8	5	2	8	7	8	10	7	10	4	6	8	7	8	8	5	2	8	7	8	10	7	10	4	6	8	7	8	8	5	2	8	7	8
C9JEU5;C9JC84;P02679-2;P02679;C9JPQ9;C9JU00	C9JEU5;C9JC84;P02679-2;P02679;C9JPQ9;C9JU00	8;8;8;8;5;5	8;8;8;8;5;5	8;8;8;8;5;5	Fibrinogen gamma chain	FGG	tr|C9JEU5|C9JEU5_HUMAN Isoform of P02679, Fibrinogen gamma chain OS=Homo sapiens OX=9606 GN=FGG PE=1 SV=1;tr|C9JC84|C9JC84_HUMAN Isoform of P02679, Fibrinogen gamma chain OS=Homo sapiens OX=9606 GN=FGG PE=1 SV=1;sp|P02679-2|FIBG-2_HUMAN Isoform of P02679,	intercellular signal molecule(PC00207)	6	8	8	8	6	8	8	4	5	1	7	6	6	8	2	4	3	5	6	8	8	4	5	1	7	6	6	8	2	4	3	5	6	8	8	4	5	1	7	6	6
P02675;D6REL8;CON__P02676	P02675;D6REL8	9;6;2	9;6;2	9;6;2	Fibrinogen beta chain;Fibrinopeptide B;Fibrinogen beta chain	FGB	sp|P02675|FIBB_HUMAN Fibrinogen beta chain OS=Homo sapiens OX=9606 GN=FGB PE=1 SV=2;tr|D6REL8|D6REL8_HUMAN Isoform of P02675, Fibrinogen beta chain OS=Homo sapiens OX=9606 GN=FGB PE=1 SV=1	intercellular signal molecule(PC00207)	3	9	9	9	9	9	9	5	7	2	9	8	9	9	8	7	8	8	9	9	9	5	7	2	9	8	9	9	8	7	8	8	9	9	9	5	7	2	9	8	9
P02751;P02751-8;P02751-13;P02751-7;P02751-1;P02751-11;P02751-3;P02751-17;P02751-14;P02751-9;P02751-6;P02751-10;P02751-12;P02751-5;P02751-4;P02751-2;P02751-16;H0Y7Z1	P02751;P02751-8;P02751-13;P02751-7;P02751-1;P02751-11;P02751-3;P02751-17;P02751-14;P02751-9;P02751-6;P02751-10;P02751-12;P02751-5;P02751-4;P02751-2;P02751-16	9;9;9;9;9;9;9;9;9;9;9;9;9;8;8;6;6;1	9;9;9;9;9;9;9;9;9;9;9;9;9;8;8;6;6;1	9;9;9;9;9;9;9;9;9;9;9;9;9;8;8;6;6;1	Fibronectin;Anastellin;Ugl-Y1;Ugl-Y2;Ugl-Y3	FN1	sp|P02751|FINC_HUMAN Fibronectin OS=Homo sapiens OX=9606 GN=FN1 PE=1 SV=5;sp|P02751-8|FINC-8_HUMAN Isoform of P02751, Isoform 8 of Fibronectin OS=Homo sapiens OX=9606 GN=FN1 PE=1 SV=5;sp|P02751-13|FINC-13_HUMAN Isoform of P02751, Isoform 13 of Fibronectin	intercellular signal molecule(PC00207)	18	9	9	9	4	2	1	1	1	2	2	9	3	5	7	4	1	6	4	2	1	1	1	2	2	9	3	5	7	4	1	6	4	2	1	1	1	2	2	9	3
P60174;P60174-3;P60174-4;U3KPZ0	P60174;P60174-3;P60174-4	3;3;2;1	3;3;2;1	3;3;2;1	Triosephosphate isomerase	TPI1	sp|P60174|TPIS_HUMAN Triosephosphate isomerase OS=Homo sapiens OX=9606 GN=TPI1 PE=1 SV=4;sp|P60174-3|TPIS-3_HUMAN Isoform of P60174, Isoform 2 of Triosephosphate isomerase OS=Homo sapiens OX=9606 GN=TPI1 PE=1 SV=4;sp|P60174-4|TPIS-4_HUMAN Isoform of P60174	isomerase(PC00135)	4	3	3	3	3	3	2	2	1	1	2	3	1	2	3	1	2	2	3	3	2	2	1	1	2	3	1	2	3	1	2	2	3	3	2	2	1	1	2	3	1
H3BT25;H3BUW1;H3BTJ2;H3BQ34;H3BTN5;P14618-2;P14618;H3BU13;B4DNK4;H3BN34;H3BQZ3	H3BT25;H3BUW1;H3BTJ2;H3BQ34;H3BTN5;P14618-2;P14618;H3BU13;B4DNK4	3;3;3;3;3;3;3;2;2;1;1	3;3;3;3;3;3;3;2;2;1;1	3;3;3;3;3;3;3;2;2;1;1	Pyruvate kinase;Pyruvate kinase PKM	PKM	tr|H3BT25|H3BT25_HUMAN Isoform of P14618, Pyruvate kinase (Fragment) OS=Homo sapiens OX=9606 GN=PKM PE=1 SV=1;tr|H3BUW1|H3BUW1_HUMAN Isoform of P14618, Pyruvate kinase (Fragment) OS=Homo sapiens OX=9606 GN=PKM PE=1 SV=1;tr|H3BTJ2|H3BTJ2_HUMAN Isoform of P1	kinase(PC00137)	11	3	3	3	3	2	3	1	1	0	2	1	2	2	1	1	1	1	3	2	3	1	1	0	2	1	2	2	1	1	1	1	3	2	3	1	1	0	2	1	2
P06733;A0A2R8Y6G6;K7EM90;P06733-2;A0A2R8Y879;A0A2R8YEM5;A0A2R8Y6I8;A0A2R8Y798;K7ERS8;A0A2R8YEG5	P06733;A0A2R8Y6G6;K7EM90;P06733-2	9;7;5;5;4;4;1;1;1;1	9;7;5;5;4;4;1;1;1;1	9;7;5;5;4;4;1;1;1;1	Alpha-enolase;Enolase	ENO1	sp|P06733|ENOA_HUMAN Alpha-enolase OS=Homo sapiens OX=9606 GN=ENO1 PE=1 SV=2;tr|A0A2R8Y6G6|A0A2R8Y6G6_HUMAN Isoform of P06733, 2-phospho-D-glycerate hydro-lyase OS=Homo sapiens OX=9606 GN=ENO1 PE=1 SV=1;tr|K7EM90|K7EM90_HUMAN Isoform of P06733, 2-phospho-D	lyase(PC00144)	10	9	9	9	9	9	7	6	6	3	7	6	6	8	8	7	8	8	9	9	7	6	6	3	7	6	6	8	8	7	8	8	9	9	7	6	6	3	7	6	6
H0YLF3;F5H6I0;P61769	H0YLF3;F5H6I0;P61769	2;2;2	2;2;2	2;2;2	Beta-2-microglobulin;Beta-2-microglobulin form pI 5.3	B2M	tr|H0YLF3|H0YLF3_HUMAN Isoform of P61769, Beta-2-microglobulin (Fragment) OS=Homo sapiens OX=9606 GN=B2M PE=1 SV=1;tr|F5H6I0|F5H6I0_HUMAN Isoform of P61769, Beta-2-microglobulin OS=Homo sapiens OX=9606 GN=B2M PE=1 SV=2;sp|P61769|B2MG_HUMAN Beta-2-microglob	major histocompatibility complex protein(PC00149)	3	2	2	2	1	1	1	1	1	2	1	0	1	1	1	0	0	1	1	1	1	1	1	2	1	0	1	1	1	0	0	1	1	1	1	1	1	2	1	0	1
Q9NP55-2;Q9NP55	Q9NP55-2;Q9NP55	2;2	2;2	2;2	BPI fold-containing family A member 1	BPIFA1	sp|Q9NP55-2|BPIA1-2_HUMAN Isoform of Q9NP55, Isoform 2 of BPI fold-containing family A member 1 OS=Homo sapiens OX=9606 GN=BPIFA1 PE=1 SV=1;sp|Q9NP55|BPIA1_HUMAN BPI fold-containing family A member 1 OS=Homo sapiens OX=9606 GN=BPIFA1 PE=1 SV=1	major histocompatibility complex protein(PC00149)	2	2	2	2	1	0	0	1	1	2	0	0	0	1	0	0	0	0	1	0	0	1	1	2	0	0	0	1	0	0	0	0	1	0	0	1	1	2	0	0	0
P02790;Q9BS19	P02790;Q9BS19	3;2	3;2	3;2	Hemopexin	HPX	sp|P02790|HEMO_HUMAN Hemopexin OS=Homo sapiens OX=9606 GN=HPX PE=1 SV=2;tr|Q9BS19|Q9BS19_HUMAN Isoform of P02790, Epididymis secretory sperm binding protein OS=Homo sapiens OX=9606 GN=HPX PE=1 SV=1	metalloprotease(PC00153)	2	3	3	3	0	1	1	0	1	0	1	1	0	0	3	3	2	2	0	1	1	0	1	0	1	1	0	0	3	3	2	2	0	1	1	0	1	0	1	1	0
P09211;A8MX94	P09211;A8MX94	2;1	2;1	2;1	Glutathione S-transferase P	GSTP1	sp|P09211|GSTP1_HUMAN Glutathione S-transferase P OS=Homo sapiens OX=9606 GN=GSTP1 PE=1 SV=2;tr|A8MX94|A8MX94_HUMAN Isoform of P09211, GST class-pi OS=Homo sapiens OX=9606 GN=GSTP1 PE=1 SV=1	non-motor actin binding protein(PC00165)	2	2	2	2	2	2	2	2	0	0	1	1	1	2	1	2	1	2	2	2	2	2	0	0	1	1	1	2	1	2	1	2	2	2	2	2	0	0	1	1	1
P07737;K7EJ44;I3L3D5;CON__P02584	P07737;K7EJ44;I3L3D5	3;2;2;1	3;2;2;1	3;2;2;1	Profilin-1	PFN1	sp|P07737|PROF1_HUMAN Profilin-1 OS=Homo sapiens OX=9606 GN=PFN1 PE=1 SV=2;tr|K7EJ44|K7EJ44_HUMAN Isoform of P07737, Profilin OS=Homo sapiens OX=9606 GN=PFN1 PE=1 SV=1;tr|I3L3D5|I3L3D5_HUMAN Isoform of P07737, Profilin (Fragment) OS=Homo sapiens OX=9606 GN	non-motor actin binding protein(PC00165)	4	3	3	3	3	3	3	1	2	1	3	2	3	3	3	3	2	2	3	3	3	1	2	1	3	2	3	3	3	3	2	2	3	3	3	1	2	1	3	2	3
X6RJP6;P37802;P37802-2	X6RJP6;P37802;P37802-2	5;5;5	5;5;5	5;5;5	Transgelin-2	TAGLN2	tr|X6RJP6|X6RJP6_HUMAN Isoform of P37802, Transgelin-2 (Fragment) OS=Homo sapiens OX=9606 GN=TAGLN2 PE=1 SV=1;sp|P37802|TAGL2_HUMAN Transgelin-2 OS=Homo sapiens OX=9606 GN=TAGLN2 PE=1 SV=3;sp|P37802-2|TAGL2-2_HUMAN Isoform of P37802, Isoform 2 of Transgeli	non-motor actin binding protein(PC00165)	3	5	5	5	4	4	4	2	4	2	5	3	3	2	2	2	4	4	4	4	4	2	4	2	5	3	3	2	2	2	4	4	4	4	4	2	4	2	5	3	3
E9PFZ2;P00450;D6RE86;H7C5R1	E9PFZ2;P00450;D6RE86;H7C5R1	2;2;1;1	2;2;1;1	2;2;1;1	Ceruloplasmin	CP	tr|E9PFZ2|E9PFZ2_HUMAN Isoform of P00450, Ceruloplasmin OS=Homo sapiens OX=9606 GN=CP PE=1 SV=1;sp|P00450|CERU_HUMAN Ceruloplasmin OS=Homo sapiens OX=9606 GN=CP PE=1 SV=1;tr|D6RE86|D6RE86_HUMAN Isoform of P00450, Ceruloplasmin (Fragment) OS=Homo sapiens OX	oxidase(PC00175)	4	2	2	2	0	0	0	0	0	0	0	0	0	0	2	1	0	1	0	0	0	0	0	0	0	0	0	0	2	1	0	1	0	0	0	0	0	0	0	0	0
P10599;P10599-2	P10599;P10599-2	3;2	3;2	3;2	Thioredoxin	TXN	sp|P10599|THIO_HUMAN Thioredoxin OS=Homo sapiens OX=9606 GN=TXN PE=1 SV=3;sp|P10599-2|THIO-2_HUMAN Isoform of P10599, Isoform 2 of Thioredoxin OS=Homo sapiens OX=9606 GN=TXN PE=1 SV=3	oxidoreductase(PC00176)	2	3	3	3	3	3	3	2	3	2	3	2	3	3	2	1	2	3	3	3	3	2	3	2	3	2	3	3	2	1	2	3	3	3	3	2	3	2	3	2	3
P12273	P12273	4	4	4	Prolactin-inducible protein	PIP	sp|P12273|PIP_HUMAN Prolactin-inducible protein OS=Homo sapiens OX=9606 GN=PIP PE=1 SV=1	phosphatase(PC00181)	1	4	4	4	3	3	2	2	2	4	1	0	3	3	1	1	2	2	3	3	2	2	2	4	1	0	3	3	1	1	2	2	3	3	2	2	2	4	1	0	3
P15309;P15309-2;E9PFE6;P15309-3;H0Y8T3	P15309;P15309-2;E9PFE6;P15309-3	4;4;3;2;1	4;4;3;2;1	4;4;3;2;1	Prostatic acid phosphatase;PAPf39	ACPP	sp|P15309|PPAP_HUMAN Prostatic acid phosphatase OS=Homo sapiens OX=9606 GN=ACP3 PE=1 SV=3;sp|P15309-2|PPAP-2_HUMAN Isoform of P15309, Isoform 2 of Prostatic acid phosphatase OS=Homo sapiens OX=9606 GN=ACP3 PE=1 SV=3;tr|E9PFE6|E9PFE6_HUMAN Isoform of P15309	phosphatase(PC00181)	5	4	4	4	4	4	3	4	3	1	3	2	4	3	2	2	2	2	4	4	3	4	3	1	3	2	4	3	2	2	2	2	4	4	3	4	3	1	3	2	4
Q5T985;P19823;CON__Q9TRI1	Q5T985;P19823	3;3;1	3;3;1	3;3;1	Inter-alpha-trypsin inhibitor heavy chain H2	ITIH2	tr|Q5T985|Q5T985_HUMAN Isoform of P19823, Inter-alpha-trypsin inhibitor heavy chain H2 OS=Homo sapiens OX=9606 GN=ITIH2 PE=1 SV=1;sp|P19823|ITIH2_HUMAN Inter-alpha-trypsin inhibitor heavy chain H2 OS=Homo sapiens OX=9606 GN=ITIH2 PE=1 SV=2	protease inhibitor(PC00191)	3	3	3	3	0	0	0	0	0	0	0	0	0	0	3	0	2	0	0	0	0	0	0	0	0	0	0	0	3	0	2	0	0	0	0	0	0	0	0	0	0
A0A3B3ISA6;F5GXS0;A0A140TA49;A0A140TA44;A0A140TA32;A0A140TA29;A0A0G2JL54;A0A0G2JPR0;P0C0L5;P0C0L4-2;P0C0L4;A0A3B3ISD7	A0A3B3ISA6;F5GXS0;A0A140TA49;A0A140TA44;A0A140TA32;A0A140TA29;A0A0G2JL54;A0A0G2JPR0;P0C0L5;P0C0L4-2;P0C0L4	4;4;4;4;4;4;4;4;4;3;3;1	4;4;4;4;4;4;4;4;4;3;3;1	4;4;4;4;4;4;4;4;4;3;3;1	Complement C4-B;Complement C4 beta chain;Complement C4-B alpha chain;C4a anaphylatoxin;C4b-B;C4d-B;Complement C4 gamma chain;Complement C4-A;Complement C4 beta chain;Complement C4-A alpha chain;C4a anaphylatoxin;C4b-A;C4d-A;Complement C4 gamma chain	C4B;C4A	tr|A0A3B3ISA6|A0A3B3ISA6_HUMAN Isoform of P0C0L5, C4a anaphylatoxin (Fragment) OS=Homo sapiens OX=9606 GN=C4B PE=1 SV=1;tr|F5GXS0|F5GXS0_HUMAN Isoform of P0C0L5, C4a anaphylatoxin OS=Homo sapiens OX=9606 GN=C4B PE=1 SV=1;tr|A0A140TA49|A0A140TA49_HUMAN Isof	protease inhibitor(PC00191)	12	4	4	4	3	2	3	4	3	4	3	4	3	4	3	2	2	3	3	2	3	4	3	4	3	4	3	4	3	2	2	3	3	2	3	4	3	4	3	4	3
A0A024R6I7;P01009;A0A0G2JRN3;P01009-2;P01009-3;G3V2B9;G3V5R8;G3V387;A0A0B4J278;G3V544	A0A024R6I7;P01009;A0A0G2JRN3;P01009-2;P01009-3	12;12;11;11;8;2;1;1;1;1	12;12;11;11;8;2;1;1;1;1	12;12;11;11;8;2;1;1;1;1	Alpha-1-antitrypsin;Short peptide from AAT	SERPINA1	tr|A0A024R6I7|A0A024R6I7_HUMAN Isoform of P01009, Alpha-1-antitrypsin OS=Homo sapiens OX=9606 GN=SERPINA1 PE=1 SV=1;sp|P01009|A1AT_HUMAN Alpha-1-antitrypsin OS=Homo sapiens OX=9606 GN=SERPINA1 PE=1 SV=3;tr|A0A0G2JRN3|A0A0G2JRN3_HUMAN Isoform of P01009, Alp	protease inhibitor(PC00191)	10	12	12	12	3	3	5	5	1	1	3	5	3	4	12	4	9	7	3	3	5	5	1	1	3	5	3	4	12	4	9	7	3	3	5	5	1	1	3	5	3
P01023;H0YFH1;P20742-2;P20742;CON__ENSEMBL:ENSBTAP00000024146;F8W7L3	P01023	26;3;3;3;2;1	26;3;3;3;2;1	26;3;3;3;2;1	Alpha-2-macroglobulin	A2M	sp|P01023|A2MG_HUMAN Alpha-2-macroglobulin OS=Homo sapiens OX=9606 GN=A2M PE=1 SV=3	protease inhibitor(PC00191)	6	26	26	26	3	3	9	2	3	3	6	20	1	5	25	10	14	15	3	3	9	2	3	3	6	20	1	5	25	10	14	15	3	3	9	2	3	3	6	20	1
P63104;B7Z2E6;H0YB80;B0AZS6;E7EX29;P63104-2;E5RGE1;E5RIR4;E9PD24;E7EVZ2;E7ESK7	P63104;B7Z2E6;H0YB80;B0AZS6;E7EX29;P63104-2	3;2;2;2;2;2;1;1;1;1;1	3;2;2;2;2;2;1;1;1;1;1	3;2;2;2;2;2;1;1;1;1;1	14-3-3 protein zeta/delta	YWHAZ	sp|P63104|1433Z_HUMAN 14-3-3 protein zeta/delta OS=Homo sapiens OX=9606 GN=YWHAZ PE=1 SV=1;tr|B7Z2E6|B7Z2E6_HUMAN Isoform of P63104, 14-3-3 protein zeta/delta OS=Homo sapiens OX=9606 GN=YWHAZ PE=1 SV=1;tr|H0YB80|H0YB80_HUMAN Isoform of P63104, 14-3-3 prote	scaffold/adaptor protein(PC00226)	11	3	3	3	2	2	3	2	3	2	3	2	2	3	2	2	3	3	2	2	3	2	3	2	3	2	2	3	2	2	3	3	2	2	3	2	3	2	3	2	2
P00747	P00747	4	4	4	Plasminogen;Plasmin heavy chain A;Activation peptide;Angiostatin;Plasmin heavy chain A, short form;Plasmin light chain B	PLG	sp|P00747|PLMN_HUMAN Plasminogen OS=Homo sapiens OX=9606 GN=PLG PE=1 SV=2	serine protease(PC00203)	1	4	4	4	0	0	0	0	0	0	0	2	0	0	4	0	2	1	0	0	0	0	0	0	0	2	0	0	4	0	2	1	0	0	0	0	0	0	0	2	0
P00738;J3QLC9;J3QR68;H0Y300;A0A0C4DGL8;P00738-2;A0A087WU08;J3KRH2;H3BS21;J3KSV1;J3QQI8;H3BMJ7	P00738;J3QLC9;J3QR68;H0Y300;A0A0C4DGL8;P00738-2;A0A087WU08	16;15;14;14;13;11;8;7;6;2;2;2	16;15;14;14;13;11;8;7;6;2;2;2	9;9;7;7;6;8;6;3;5;2;2;2	Haptoglobin;Haptoglobin alpha chain;Haptoglobin beta chain	HP	sp|P00738|HPT_HUMAN Haptoglobin OS=Homo sapiens OX=9606 GN=HP PE=1 SV=1;tr|J3QLC9|J3QLC9_HUMAN Isoform of P00738, Haptoglobin (Fragment) OS=Homo sapiens OX=9606 GN=HP PE=1 SV=1;tr|J3QR68|J3QR68_HUMAN Isoform of P00738, Haptoglobin (Fragment) OS=Homo sapien	serine protease(PC00203)	12	16	16	9	3	4	2	3	1	1	7	6	5	8	14	6	13	11	3	4	2	3	1	1	7	6	5	8	14	6	13	11	2	4	1	2	1	0	5	3	3
P61224;F5H7Y6;E7ESV4;P61224-3;P61224-4;F5GX62;F5H6R7;F5H004;F5H823;F5GYB5;A0A075B6Q0;F5H4H0;B7ZB78;F8WBC0;F5GZG1;F5H0B7;F5H491;F5GWU8;F5H077;F5GYH7;P61224-2;P62834;A6NIZ1;F5H500	P61224;F5H7Y6;E7ESV4;P61224-3;P61224-4;F5GX62;F5H6R7;F5H004;F5H823;F5GYB5;A0A075B6Q0;F5H4H0;B7ZB78;F8WBC0;F5GZG1;F5H0B7;F5H491;F5GWU8;F5H077;F5GYH7;P61224-2;P62834;A6NIZ1;F5H500	2;2;2;2;2;2;2;2;1;1;1;1;1;1;1;1;1;1;1;1;1;1;1;1	2;2;2;2;2;2;2;2;1;1;1;1;1;1;1;1;1;1;1;1;1;1;1;1	2;2;2;2;2;2;2;2;1;1;1;1;1;1;1;1;1;1;1;1;1;1;1;1	Ras-related protein Rap-1b;Ras-related protein Rap-1A;Ras-related protein Rap-1b-like protein	RAP1B;RAP1A	sp|P61224|RAP1B_HUMAN Ras-related protein Rap-1b OS=Homo sapiens OX=9606 GN=RAP1B PE=1 SV=1;tr|F5H7Y6|F5H7Y6_HUMAN Isoform of P61224, Ras-related protein Rap-1b OS=Homo sapiens OX=9606 GN=RAP1B PE=1 SV=1;tr|E7ESV4|E7ESV4_HUMAN Isoform of P61224, Ras-relate	small GTPase(PC00208)	24	2	2	2	2	2	2	2	2	0	2	2	2	2	2	1	2	2	2	2	2	2	2	0	2	2	2	2	2	1	2	2	2	2	2	2	2	0	2	2	2
E7EQB2;E7ER44;P02788-2;P02788;C9JCF5;CON__Q29443;CON__Q0IIK2	E7EQB2;E7ER44;P02788-2;P02788	14;14;14;14;2;1;1	14;14;14;14;2;1;1	14;14;14;14;2;1;1	Lactotransferrin;Lactoferricin-H;Kaliocin-1;Lactoferroxin-A;Lactoferroxin-B;Lactoferroxin-C	LTF	tr|E7EQB2|E7EQB2_HUMAN Isoform of P02788, Lactotransferrin (Fragment) OS=Homo sapiens OX=9606 GN=LTF PE=1 SV=1;tr|E7ER44|E7ER44_HUMAN Isoform of P02788, Lactotransferrin OS=Homo sapiens OX=9606 GN=LTF PE=1 SV=1;sp|P02788-2|TRFL-2_HUMAN Isoform of P02788, I	transfer/carrier protein(PC00219)	7	14	14	14	13	13	6	6	4	12	6	6	9	13	1	1	3	1	13	13	6	6	4	12	6	6	9	13	1	1	3	1	13	13	6	6	4	12	6	6	9
P02787;H7C5E8;F8WEK9;F8WCI6;C9JB55;C9JVG0;F8WC57	P02787	25;5;3;3;2;2;1	25;5;3;3;2;2;1	25;5;3;3;2;2;1	Serotransferrin	TF	sp|P02787|TRFE_HUMAN Serotransferrin OS=Homo sapiens OX=9606 GN=TF PE=1 SV=3	transfer/carrier protein(PC00219)	7	25	25	25	4	4	7	4	4	1	8	10	4	7	25	14	23	19	4	4	7	4	4	1	8	10	4	7	25	14	23	19	4	4	7	4	4	1	8	10	4
P00488	P00488	2	2	2	Coagulation factor XIII A chain	F13A1	sp|P00488|F13A_HUMAN Coagulation factor XIII A chain OS=Homo sapiens OX=9606 GN=F13A1 PE=1 SV=4	transferase(PC00220)	1	2	2	2	2	2	1	2	1	0	2	1	2	2	1	1	1	2	2	2	1	2	1	0	2	1	2	2	1	1	1	2	2	2	1	2	1	0	2	1	2
P69905;G3V1N2;A0A2R8Y7C0;P02008	P69905;G3V1N2;A0A2R8Y7C0	7;6;5;1	7;6;5;1	3;2;1;0	Hemoglobin subunit alpha	HBA1;HBA2	sp|P69905|HBA_HUMAN Hemoglobin subunit alpha OS=Homo sapiens OX=9606 GN=HBA2 PE=1 SV=2;tr|G3V1N2|G3V1N2_HUMAN Isoform of P69905, HCG1745306, isoform CRA_a OS=Homo sapiens OX=9606 GN=HBA2 PE=1 SV=1;tr|A0A2R8Y7C0|A0A2R8Y7C0_HUMAN Isoform of P69905, Hemoglobi	transferase(PC00220)	4	7	7	3	7	6	6	7	6	7	6	7	6	6	7	6	7	7	7	6	6	7	6	7	6	7	6	6	7	6	7	7	3	3	2	3	2	3	2	3	2
A0A7I2V3H3;A0A7I2V5N4;A0A7I2V659;A0A087WVQ9;Q5VTE0;P68104;A0A087WV01;A0A2U3TZH3;Q05639;A6PW80;Q5JR01;A0A2R8Y660;A0A2R8Y488;A0A6Q8PFK6;A0A2R8YDN5	A0A7I2V3H3;A0A7I2V5N4;A0A7I2V659;A0A087WVQ9;Q5VTE0;P68104;A0A087WV01;A0A2U3TZH3;Q05639;A6PW80;Q5JR01;A0A2R8Y660;A0A2R8Y488	4;4;4;4;4;4;3;3;3;2;2;2;2;1;1	4;4;4;4;4;4;3;3;3;2;2;2;2;1;1	4;4;4;4;4;4;3;3;3;2;2;2;2;1;1	Putative elongation factor 1-alpha-like 3;Elongation factor 1-alpha 1;Elongation factor 1-alpha;Elongation factor 1-alpha 2	EEF1A1;EEF1A1P5;EEF1A2	tr|A0A7I2V3H3|A0A7I2V3H3_HUMAN Isoform of P68104, Elongation factor 1-alpha OS=Homo sapiens OX=9606 GN=EEF1A1 PE=1 SV=1;tr|A0A7I2V5N4|A0A7I2V5N4_HUMAN Isoform of P68104, Elongation factor 1-alpha OS=Homo sapiens OX=9606 GN=EEF1A1 PE=1 SV=1;tr|A0A7I2V659|A0	translation factor(PC00223)	15	4	4	4	3	4	4	3	3	2	4	3	3	4	3	3	2	4	3	4	4	3	3	2	4	3	3	4	3	3	2	4	3	4	4	3	3	2	4	3	3
P10909-4;P10909-6;P10909;P10909-5;P10909-2;E7ERK6;E7ETB4;H0YLK8;E5RG36;E5RGB0;E5RH61;E5RJZ5;H0YC35;P10909-3;H0YAS8	P10909-4;P10909-6;P10909;P10909-5;P10909-2;E7ERK6;E7ETB4;H0YLK8;E5RG36;E5RGB0;E5RH61;E5RJZ5;H0YC35	6;6;6;6;6;4;4;4;3;3;3;3;3;2;1	6;6;6;6;6;4;4;4;3;3;3;3;3;2;1	6;6;6;6;6;4;4;4;3;3;3;3;3;2;1	Clusterin;Clusterin beta chain;Clusterin alpha chain;Clusterin	CLU	sp|P10909-4|CLUS-4_HUMAN Isoform of P10909, Isoform 4 of Clusterin OS=Homo sapiens OX=9606 GN=CLU PE=1 SV=1;sp|P10909-6|CLUS-6_HUMAN Isoform of P10909, Isoform 6 of Clusterin OS=Homo sapiens OX=9606 GN=CLU PE=1 SV=1;sp|P10909|CLUS_HUMAN Clusterin OS=Homo s	translation initiation factor(PC00224)	15	6	6	6	4	2	5	2	2	2	5	4	5	4	6	1	4	2	4	2	5	2	2	2	5	4	5	4	6	1	4	2	4	2	5	2	2	2	5	4	5
P68371;P04350;M0R042;M0R2D3;M0QYM7;M0R0X0;M0R2T4;M0QY85;M0QY37;M0QX14;M0QZL7;M0R278	P68371;P04350	8;5;2;2;2;1;1;1;1;1;1;1	2;1;1;1;1;1;1;1;1;1;1;1	2;1;1;1;1;1;1;1;1;1;1;1	Tubulin beta-4B chain;Tubulin beta-4A chain	TUBB4B;TUBB4A	sp|P68371|TBB4B_HUMAN Tubulin beta-4B chain OS=Homo sapiens OX=9606 GN=TUBB4B PE=1 SV=1;sp|P04350|TBB4A_HUMAN Tubulin beta-4A chain OS=Homo sapiens OX=9606 GN=TUBB4A PE=1 SV=2	tubulin(PC00228)	12	8	2	2	7	7	7	5	5	3	6	8	7	6	5	7	6	6	1	1	1	0	1	0	0	2	1	1	1	1	1	1	1	1	1	0	1	0	0	2	1
Q5JP53;P07437;Q5ST81;Q9BVA1;Q13885;A0A0B4J269;Q13509;Q13509-2;G3V5W4;G3V2R8;G3V3R4;G3V2N6;G3V2A3;K7ESM5;Q9BUF5	Q5JP53;P07437;Q5ST81;Q9BVA1;Q13885	9;9;6;5;5;4;4;3;1;1;1;1;1;1;1	9;9;6;5;5;4;4;3;1;1;1;1;1;1;1	3;3;0;1;1;1;1;0;1;1;1;1;0;0;0	Tubulin beta chain;Tubulin beta-2B chain;Tubulin beta-2A chain	TUBB;TUBB2B;TUBB2A	tr|Q5JP53|Q5JP53_HUMAN Isoform of P07437, Tubulin beta chain OS=Homo sapiens OX=9606 GN=TUBB PE=1 SV=1;sp|P07437|TBB5_HUMAN Tubulin beta chain OS=Homo sapiens OX=9606 GN=TUBB PE=1 SV=2;tr|Q5ST81|Q5ST81_HUMAN Isoform of P07437, Tubulin beta chain OS=Homo sa	tubulin(PC00228)	15	9	9	3	8	8	8	6	5	4	8	6	6	6	6	6	7	6	8	8	8	6	5	4	8	6	6	6	6	6	7	6	2	2	2	1	1	1	2	0	0
Q71U36-2;P68363;Q71U36;P68363-2;P0DPH7;P0DPH8;F5H5D3;P0DPH7-2;P68366-2;P68366;Q9BQE3;Q6PEY2;A0A1W2PQM2;C9JDS9;A6NHL2;Q9NY65-2;A6NHL2-2;F8VVB9;A0A7P0TA31;Q9NY65;A0A7P0T945;F8VQQ4;C9J2C0	Q71U36-2;P68363;Q71U36;P68363-2;P0DPH7;P0DPH8;F5H5D3;P0DPH7-2;P68366-2;P68366;Q9BQE3;Q6PEY2;A0A1W2PQM2;C9JDS9	4;4;4;3;3;3;3;3;3;3;3;3;2;2;1;1;1;1;1;1;1;1;1	4;4;4;3;3;3;3;3;3;3;3;3;2;2;1;1;1;1;1;1;1;1;1	4;4;4;3;3;3;3;3;3;3;3;3;2;2;1;1;1;1;1;1;1;1;1	Tubulin alpha-1A chain;Tubulin alpha-1B chain;Tubulin alpha-4A chain;Tubulin alpha-1C chain;Tubulin alpha-3E chain	TUBA1A;TUBA1B;TUBA1C;TUBA4A;TUBA3E	sp|Q71U36-2|TBA1A-2_HUMAN Isoform of Q71U36, Isoform 2 of Tubulin alpha-1A chain OS=Homo sapiens OX=9606 GN=TUBA1A PE=1 SV=1;sp|P68363|TBA1B_HUMAN Tubulin alpha-1B chain OS=Homo sapiens OX=9606 GN=TUBA1B PE=1 SV=1;sp|Q71U36|TBA1A_HUMAN Tubulin alpha-1A cha	tubulin(PC00228)	23	4	4	4	3	4	3	2	1	0	4	3	4	4	3	3	3	3	3	4	3	2	1	0	4	3	4	4	3	3	3	3	3	4	3	2	1	0	4	3	4
P17066;P48741	P17066;P48741	4;3	2;2	1;1	Heat shock 70 kDa protein 6;Putative heat shock 70 kDa protein 7	HSPA6;HSPA7	sp|P17066|HSP76_HUMAN Heat shock 70 kDa protein 6 OS=Homo sapiens OX=9606 GN=HSPA6 PE=1 SV=2;sp|P48741|HSP77_HUMAN Putative heat shock 70 kDa protein 7 OS=Homo sapiens OX=9606 GN=HSPA7 PE=5 SV=2		2	4	2	1	3	4	2	1	1	1	3	3	4	4	1	3	2	1	2	2	1	0	1	1	1	1	2	2	0	2	1	1	1	1	1	0	1	1	1	1	1
A0A0G2JIW1;P0DMV8-2;P0DMV9;P0DMV8;Q53FA3;P34931;V9GZ37	A0A0G2JIW1;P0DMV8-2;P0DMV9;P0DMV8;Q53FA3;P34931;V9GZ37	4;4;4;4;3;3;2	2;2;2;2;1;1;1	2;2;2;2;1;1;1	Heat shock 70 kDa protein 1A;Heat shock 70 kDa protein 1B;Heat shock 70 kDa protein 1-like	HSPA1A;HSPA1B;HSPA1L	tr|A0A0G2JIW1|A0A0G2JIW1_HUMAN Isoform of P0DMV9, Heat shock 70 kDa protein 1B OS=Homo sapiens OX=9606 GN=HSPA1B PE=1 SV=1;sp|P0DMV8-2|HS71A-2_HUMAN Isoform of P0DMV8, Isoform 2 of Heat shock 70 kDa protein 1A OS=Homo sapiens OX=9606 GN=HSPA1A PE=1 SV=1;sp		7	4	2	2	3	3	2	1	1	0	2	2	4	4	1	1	2	1	1	1	1	0	1	0	1	1	2	2	0	0	1	1	1	1	1	0	1	0	1	1	2
A0A0U1RRH7;P0C0S8;C9J0D1;A0A494C189;A0A3B3IS11;P20671;Q9BTM1-2;P16104;Q96QV6;Q6FI13;P04908;A0A0U1RR32;Q93077;Q7L7L0;Q9BTM1;P0C0S5;Q96KK5;Q99878;Q71UI9;Q71UI9-2;Q16777;Q71UI9-5;Q8IUE6;C9J386;Q71UI9-4;Q71UI9-3;H0YFX9	A0A0U1RRH7;P0C0S8;C9J0D1;A0A494C189;A0A3B3IS11;P20671;Q9BTM1-2;P16104;Q96QV6;Q6FI13;P04908;A0A0U1RR32;Q93077;Q7L7L0;Q9BTM1;P0C0S5;Q96KK5;Q99878;Q71UI9;Q71UI9-2;Q16777;Q71UI9-5;Q8IUE6;C9J386;Q71UI9-4;Q71UI9-3;H0YFX9	2;2;2;2;2;2;2;2;2;2;2;2;2;2;2;2;2;2;2;2;2;1;1;1;1;1;1	2;2;2;2;2;2;2;2;2;2;2;2;2;2;2;2;2;2;2;2;2;1;1;1;1;1;1	2;2;2;2;2;2;2;2;2;2;2;2;2;2;2;2;2;2;2;2;2;1;1;1;1;1;1	Histone H2A type 1;Histone H2A;Histone H2A type 1-D;Histone H2A.J;Histone H2AX;Histone H2A type 1-A;Histone H2A type 2-A;Histone H2A type 1-B/E;Histone H2A type 1-C;Histone H2A type 3;Histone H2A.Z;Histone H2A type 1-H;Histone H2A type 1-J;Histone H2A.V;Histone H2A type 2-C;Histone H2A type 2-B	HIST1H2AG;H2AFV;HIST1H2AD;H2AFJ;H2AFX;HIST1H2AA;HIST2H2AA3;HIST1H2AB;HIST1H2AC;HIST3H2A;H2AFZ;HIST1H2AH;HIST1H2AJ;HIST2H2AC;HIST2H2AB	tr|A0A0U1RRH7|A0A0U1RRH7_HUMAN readthrough, Histone H2A OS=Homo sapiens OX=9606 PE=3 SV=1;sp|P0C0S8|H2A1_HUMAN Histone H2A type 1 OS=Homo sapiens OX=9606 GN=H2AC17 PE=1 SV=2;tr|C9J0D1|C9J0D1_HUMAN Isoform of Q71UI9, Histone H2A OS=Homo sapiens OX=9606 GN=H		27	2	2	2	2	2	2	2	2	1	2	2	2	2	2	2	2	2	2	2	2	2	2	1	2	2	2	2	2	2	2	2	2	2	2	2	2	1	2	2	2
P04004	P04004	2	2	2	Vitronectin;Vitronectin V65 subunit;Vitronectin V10 subunit;Somatomedin-B	VTN	sp|P04004|VTNC_HUMAN Vitronectin OS=Homo sapiens OX=9606 GN=VTN PE=1 SV=1		1	2	2	2	0	0	1	0	1	0	1	1	0	0	2	0	0	0	0	0	1	0	1	0	1	1	0	0	2	0	0	0	0	0	1	0	1	0	1	1	0
P04279-2;P04279	P04279-2;P04279	4;4	2;2	2;2	Semenogelin-1;Alpha-inhibin-92;Alpha-inhibin-31;Seminal basic protein	SEMG1	sp|P04279-2|SEMG1-2_HUMAN Isoform of P04279, Isoform 2 of Semenogelin-1 OS=Homo sapiens OX=9606 GN=SEMG1 PE=1 SV=2;sp|P04279|SEMG1_HUMAN Semenogelin-1 OS=Homo sapiens OX=9606 GN=SEMG1 PE=1 SV=2		2	4	2	2	3	3	4	2	2	1	4	3	4	4	2	2	2	2	1	1	2	1	1	0	2	1	2	2	1	1	1	1	1	1	2	1	1	0	2	1	2
Q5T123;Q9H299	Q5T123;Q9H299	2;2	2;2	2;2	SH3 domain-binding glutamic acid-rich-like protein 3	SH3BGRL3	tr|Q5T123|Q5T123_HUMAN Isoform of Q9H299, SH3 domain-binding glutamic acid-rich-like protein 3 OS=Homo sapiens OX=9606 GN=SH3BGRL3 PE=1 SV=1;sp|Q9H299|SH3L3_HUMAN SH3 domain-binding glutamic acid-rich-like protein 3 OS=Homo sapiens OX=9606 GN=SH3BGRL3 PE=1		2	2	2	2	1	2	2	1	1	1	2	2	2	1	2	2	2	1	1	2	2	1	1	1	2	2	2	1	2	2	2	1	1	2	2	1	1	1	2	2	2
Q5T749	Q5T749	2	2	2	Keratinocyte proline-rich protein	KPRP	sp|Q5T749|KPRP_HUMAN Keratinocyte proline-rich protein OS=Homo sapiens OX=9606 GN=KPRP PE=1 SV=1		1	2	2	2	2	2	2	2	0	2	2	1	1	2	0	0	1	2	2	2	2	2	0	2	2	1	1	2	0	0	1	2	2	2	2	2	0	2	2	1	1
Q6UWP8	Q6UWP8	2	2	2	Suprabasin	SBSN	sp|Q6UWP8|SBSN_HUMAN Suprabasin OS=Homo sapiens OX=9606 GN=SBSN PE=1 SV=2		1	2	2	2	2	0	1	2	1	2	2	1	2	2	0	1	1	1	2	0	1	2	1	2	2	1	2	2	0	1	1	1	2	0	1	2	1	2	2	1	2
Q9ULM0	Q9ULM0	2	2	2	Pleckstrin homology domain-containing family H member 1	PLEKHH1	sp|Q9ULM0|PKHH1_HUMAN Pleckstrin homology domain-containing family H member 1 OS=Homo sapiens OX=9606 GN=PLEKHH1 PE=2 SV=2		1	2	2	2	0	0	1	1	0	0	1	0	1	1	1	0	1	1	0	0	1	1	0	0	1	0	1	1	1	0	1	1	0	0	1	1	0	0	1	0	1
P81605;P81605-2	P81605;P81605-2	3;3	3;3	3;3	Dermcidin;Survival-promoting peptide;DCD-1	DCD	sp|P81605|DCD_HUMAN Dermcidin OS=Homo sapiens OX=9606 GN=DCD PE=1 SV=2;sp|P81605-2|DCD-2_HUMAN Isoform of P81605, Isoform 2 of Dermcidin OS=Homo sapiens OX=9606 GN=DCD PE=1 SV=2		2	3	3	3	3	3	3	3	3	2	3	3	3	3	3	2	3	2	3	3	3	3	3	2	3	3	3	3	3	2	3	2	3	3	3	3	3	2	3	3	3
X6RLJ0;P02745	X6RLJ0;P02745	3;3	3;3	3;3	Complement C1q subcomponent subunit A	C1QA	tr|X6RLJ0|X6RLJ0_HUMAN Isoform of P02745, Complement C1q subcomponent subunit A (Fragment) OS=Homo sapiens OX=9606 GN=C1QA PE=1 SV=7;sp|P02745|C1QA_HUMAN Complement C1q subcomponent subunit A OS=Homo sapiens OX=9606 GN=C1QA PE=1 SV=2		2	3	3	3	0	0	1	0	0	0	0	2	0	0	3	1	0	1	0	0	1	0	0	0	0	2	0	0	3	1	0	1	0	0	1	0	0	0	0	2	0
P02747	P02747	4	4	4	Complement C1q subcomponent subunit C	C1QC	sp|P02747|C1QC_HUMAN Complement C1q subcomponent subunit C OS=Homo sapiens OX=9606 GN=C1QC PE=1 SV=3		1	4	4	4	0	0	0	0	0	0	1	3	1	0	4	0	0	3	0	0	0	0	0	0	1	3	1	0	4	0	0	3	0	0	0	0	0	0	1	3	1
Q86UX7;Q86UX7-2;F5H1C6	Q86UX7;Q86UX7-2;F5H1C6	4;4;2	4;4;2	4;4;2	Fermitin family homolog 3	FERMT3	sp|Q86UX7|URP2_HUMAN Fermitin family homolog 3 OS=Homo sapiens OX=9606 GN=FERMT3 PE=1 SV=1;sp|Q86UX7-2|URP2-2_HUMAN Isoform of Q86UX7, Isoform 2 of Fermitin family homolog 3 OS=Homo sapiens OX=9606 GN=FERMT3 PE=1 SV=1;tr|F5H1C6|F5H1C6_HUMAN Isoform of Q86U		3	4	4	4	1	1	1	0	0	0	1	0	0	2	2	3	1	2	1	1	1	0	0	0	1	0	0	2	2	3	1	2	1	1	1	0	0	0	1	0	0
B0YJC4;P08670;B0YJC5;A0A1B0GVG8;A0A1B0GTT5;H7C5W5;P41219;P41219-2	B0YJC4;P08670;B0YJC5	5;5;4;1;1;1;1;1	5;5;4;1;1;1;1;1	5;5;4;1;1;1;1;1	Vimentin	VIM	tr|B0YJC4|B0YJC4_HUMAN Isoform of P08670, Vimentin OS=Homo sapiens OX=9606 GN=VIM PE=1 SV=1;sp|P08670|VIME_HUMAN Vimentin OS=Homo sapiens OX=9606 GN=VIM PE=1 SV=4;tr|B0YJC5|B0YJC5_HUMAN Isoform of P08670, Vimentin OS=Homo sapiens OX=9606 GN=VIM PE=1 SV=1		8	5	5	5	2	3	4	0	3	1	1	1	1	3	1	0	1	3	2	3	4	0	3	1	1	1	1	3	1	0	1	3	2	3	4	0	3	1	1	1	1
J3KPS3;P04075;P04075-2;H3BQN4;H3BUH7;H3BPS8;H3BR68;H3BMQ8;H3BR04;H3BU78	J3KPS3;P04075;P04075-2;H3BQN4;H3BUH7;H3BPS8	5;5;5;4;3;3;2;2;2;1	5;5;5;4;3;3;2;2;2;1	5;5;5;4;3;3;2;2;2;1	Fructose-bisphosphate aldolase;Fructose-bisphosphate aldolase A	ALDOA	tr|J3KPS3|J3KPS3_HUMAN Isoform of P04075, Fructose-bisphosphate aldolase OS=Homo sapiens OX=9606 GN=ALDOA PE=1 SV=1;sp|P04075|ALDOA_HUMAN Fructose-bisphosphate aldolase A OS=Homo sapiens OX=9606 GN=ALDOA PE=1 SV=2;sp|P04075-2|ALDOA-2_HUMAN Isoform of P0407		10	5	5	5	4	4	3	4	2	0	5	4	3	5	4	3	4	3	4	4	3	4	2	0	5	4	3	5	4	3	4	3	4	4	3	4	2	0	5	4	3
P02671;P02671-2;A0A087WUA0	P02671;P02671-2	5;5;1	5;5;1	5;5;1	Fibrinogen alpha chain;Fibrinopeptide A;Fibrinogen alpha chain	FGA	sp|P02671|FIBA_HUMAN Fibrinogen alpha chain OS=Homo sapiens OX=9606 GN=FGA PE=1 SV=2;sp|P02671-2|FIBA-2_HUMAN Isoform of P02671, Isoform 2 of Fibrinogen alpha chain OS=Homo sapiens OX=9606 GN=FGA PE=1 SV=2		3	5	5	5	5	5	5	4	3	2	5	4	4	5	3	2	4	4	5	5	5	4	3	2	5	4	4	5	3	2	4	4	5	5	5	4	3	2	5	4	4
A0A0A0MSV6;D6R934;P02746;D6RGJ1	A0A0A0MSV6;D6R934;P02746	6;6;6;2	6;6;6;2	6;6;6;2	Complement C1q subcomponent subunit B	C1QB	tr|A0A0A0MSV6|A0A0A0MSV6_HUMAN Isoform of P02746, Complement C1q subcomponent subunit B (Fragment) OS=Homo sapiens OX=9606 GN=C1QB PE=1 SV=6;tr|D6R934|D6R934_HUMAN Isoform of P02746, Complement C1q subcomponent subunit B OS=Homo sapiens OX=9606 GN=C1QB PE=		4	6	6	6	0	0	0	1	1	0	0	5	1	0	6	2	0	2	0	0	0	1	1	0	0	5	1	0	6	2	0	2	0	0	0	1	1	0	0	5	1
E9PKE3;P11142-2;P11142;E9PN89;E9PNE6;E9PI65;E9PQQ4;E9PQK7;E9PK54;E9PLF4;P54652;E9PN25;E9PPY6;A8K7Q2	E9PKE3;P11142-2;P11142;E9PN89;E9PNE6;E9PI65;E9PQQ4;E9PQK7;E9PK54;E9PLF4;P54652	8;8;8;5;5;4;4;4;4;4;4;3;3;2	8;8;8;5;5;4;4;4;4;4;4;3;3;2	6;6;6;4;3;3;3;3;3;3;2;2;2;1	Heat shock cognate 71 kDa protein;Heat shock-related 70 kDa protein 2	HSPA8;HSPA2	tr|E9PKE3|E9PKE3_HUMAN Isoform of P11142, Heat shock cognate 71 kDa protein OS=Homo sapiens OX=9606 GN=HSPA8 PE=1 SV=1;sp|P11142-2|HSP7C-2_HUMAN Isoform of P11142, Isoform 2 of Heat shock cognate 71 kDa protein OS=Homo sapiens OX=9606 GN=HSPA8 PE=1 SV=1;sp		14	8	8	6	7	8	4	3	2	1	7	7	7	8	4	3	5	3	7	8	4	3	2	1	7	7	7	8	4	3	5	3	6	6	3	2	2	1	5	5	5
P61626;F8VV32;A0A0B4J259	P61626;F8VV32;A0A0B4J259	6;3;3	6;3;3	6;3;3	Lysozyme C;Lysozyme	LYZ	sp|P61626|LYSC_HUMAN Lysozyme C OS=Homo sapiens OX=9606 GN=LYZ PE=1 SV=1;tr|F8VV32|F8VV32_HUMAN Isoform of P61626, 1,4-beta-N-acetylmuramidase C OS=Homo sapiens OX=9606 GN=LYZ PE=1 SV=1;tr|A0A0B4J259|A0A0B4J259_HUMAN Isoform of P61626, 1,4-beta-N-acetylmur		3	6	6	6	5	0	0	1	3	5	1	0	0	0	1	0	0	1	5	0	0	1	3	5	1	0	0	0	1	0	0	1	5	0	0	1	3	5	1	0	0
P68871;A0A2R8Y7R2;F8W6P5;A0A0J9YWK4	P68871;A0A2R8Y7R2;F8W6P5	12;9;7;2	12;9;7;2	6;4;3;1	Hemoglobin subunit beta;LVV-hemorphin-7;Spinorphin	HBB	sp|P68871|HBB_HUMAN Hemoglobin subunit beta OS=Homo sapiens OX=9606 GN=HBB PE=1 SV=2;tr|A0A2R8Y7R2|A0A2R8Y7R2_HUMAN Isoform of P68871, Hemoglobin subunit beta OS=Homo sapiens OX=9606 GN=HBB PE=1 SV=1;tr|F8W6P5|F8W6P5_HUMAN Isoform of P68871, Hemoglobin sub		4	12	12	6	12	10	11	9	9	10	11	11	9	10	9	9	9	8	12	10	11	9	9	10	11	11	9	10	9	9	9	8	6	5	5	5	5	4	5	6	4
O43866	O43866	7	7	7	CD5 antigen-like	CD5L	sp|O43866|CD5L_HUMAN CD5 antigen-like OS=Homo sapiens OX=9606 GN=CD5L PE=1 SV=1		1	7	7	7	0	0	1	0	0	0	0	7	1	0	3	3	1	1	0	0	1	0	0	0	0	7	1	0	3	3	1	1	0	0	1	0	0	0	0	7	1
Q8TDL5;Q8TDL5-2	Q8TDL5	7;1	7;1	7;1	BPI fold-containing family B member 1	BPIFB1	sp|Q8TDL5|BPIB1_HUMAN BPI fold-containing family B member 1 OS=Homo sapiens OX=9606 GN=BPIFB1 PE=1 SV=1		2	7	7	7	7	1	0	0	0	6	0	0	0	1	0	1	0	0	7	1	0	0	0	6	0	0	0	1	0	1	0	0	7	1	0	0	0	6	0	0	0
Q02383	Q02383	10	10	8	Semenogelin-2	SEMG2	sp|Q02383|SEMG2_HUMAN Semenogelin-2 OS=Homo sapiens OX=9606 GN=SEMG2 PE=1 SV=1		1	10	10	8	10	9	10	6	8	5	10	8	10	10	8	8	8	7	10	9	10	6	8	5	10	8	10	10	8	8	8	7	8	7	8	5	7	4	8	6	8
P12814-2;P12814;A0A7I2V4Y4;P12814-3;H9KV75;P12814-4;H0YJW3;H7C5W8;H0YJ11;P35609;P35609-2;O43707;F5GXS2;A0A494C1A0;H7C144;O43707-2;A0A494C166;A0A494C033;G3V2N5;A0A087WSZ2;Q08043;A0A494C060;O43707-3;G3V5M4;G3V380;G3V2E8;A0A494C0Q3;G3V2X9;G3V2W4	P12814-2;P12814;A0A7I2V4Y4;P12814-3;H9KV75;P12814-4;H0YJW3;H7C5W8	12;12;12;12;11;11;6;6;5;4;4;4;4;4;4;3;2;2;2;2;2;2;2;2;1;1;1;1;1	12;12;12;12;11;11;6;6;5;4;4;4;4;4;4;3;2;2;2;2;2;2;2;2;1;1;1;1;1	12;12;12;12;11;11;6;6;5;4;4;4;4;4;4;3;2;2;2;2;2;2;2;2;1;1;1;1;1	Alpha-actinin-1	ACTN1	sp|P12814-2|ACTN1-2_HUMAN Isoform of P12814, Isoform 2 of Alpha-actinin-1 OS=Homo sapiens OX=9606 GN=ACTN1 PE=1 SV=2;sp|P12814|ACTN1_HUMAN Alpha-actinin-1 OS=Homo sapiens OX=9606 GN=ACTN1 PE=1 SV=2;tr|A0A7I2V4Y4|A0A7I2V4Y4_HUMAN Isoform of P12814, Alpha-ac		29	12	12	12	10	12	10	4	4	2	10	11	9	11	5	7	7	6	10	12	10	4	4	2	10	11	9	11	5	7	7	6	10	12	10	4	4	2	10	11	9
P01024;M0QXZ3;M0R0Q9;M0QYC8	P01024	17;2;2;1	17;2;2;1	14;2;2;1	Complement C3;Complement C3 beta chain;C3-beta-c;Complement C3 alpha chain;C3a anaphylatoxin;Acylation stimulating protein;Complement C3b alpha chain;Complement C3c alpha chain fragment 1;Complement C3dg fragment;Complement C3g fragment;Complement C3d fragment;Complement C3f fragment;Complement C3c alpha chain fragment 2	C3	sp|P01024|CO3_HUMAN Complement C3 OS=Homo sapiens OX=9606 GN=C3 PE=1 SV=2		4	17	17	14	6	8	14	8	8	6	13	12	11	11	16	4	12	8	6	8	14	8	8	6	13	12	11	11	16	4	12	8	6	8	12	8	8	6	12	11	10
P18206;P18206-2;P18206-3	P18206;P18206-2	15;15;2	15;15;2	15;15;2	Vinculin	VCL	sp|P18206|VINC_HUMAN Vinculin OS=Homo sapiens OX=9606 GN=VCL PE=1 SV=4;sp|P18206-2|VINC-2_HUMAN Isoform of P18206, Isoform 1 of Vinculin OS=Homo sapiens OX=9606 GN=VCL PE=1 SV=4		3	15	15	15	12	13	12	6	7	2	13	11	11	14	7	7	10	10	12	13	12	6	7	2	13	11	11	14	7	7	10	10	12	13	12	6	7	2	13	11	11
P35579;P35579-2;P35749-2;P35749-4;P35749-3;P35749;Q7Z406-2;Q7Z406;A0A494C024;P35580-4;Q7Z406-6;P35580-3;P35580-2;P35580-5;P35580;Q7Z406-4;Q7Z406-5;A0A2R8Y4C3;Q5BKV1;M0QY43;A0A0C4DFM8;E7ERA5	P35579;P35579-2	23;16;3;3;3;3;2;2;2;2;2;2;2;2;2;2;2;1;1;1;1;1	23;16;3;3;3;3;2;2;2;2;2;2;2;2;2;2;2;1;1;1;1;1	23;16;3;3;3;3;2;2;2;2;2;2;2;2;2;2;2;1;1;1;1;1	Myosin-9	MYH9	sp|P35579|MYH9_HUMAN Myosin-9 OS=Homo sapiens OX=9606 GN=MYH9 PE=1 SV=4;sp|P35579-2|MYH9-2_HUMAN Isoform of P35579, Isoform 2 of Myosin-9 OS=Homo sapiens OX=9606 GN=MYH9 PE=1 SV=4		22	23	23	23	19	20	19	15	10	2	21	19	22	22	16	16	15	14	19	20	19	15	10	2	21	19	22	22	16	16	15	14	19	20	19	15	10	2	21	19	22
Q9Y490;H0YMT1;A0A1B0GVU7;Q9Y4G6	Q9Y490	33;4;4;4	33;4;4;4	33;4;4;4	Talin-1	TLN1	sp|Q9Y490|TLN1_HUMAN Talin-1 OS=Homo sapiens OX=9606 GN=TLN1 PE=1 SV=3		4	33	33	33	29	30	31	21	20	7	30	25	28	30	22	21	23	26	29	30	31	21	20	7	30	25	28	30	22	21	23	26	29	30	31	21	20	7	30	25	28
P21333;P21333-2;Q60FE5;A0A7P0NMY4;A0A087WWY3;A0A7I2V3E6;F8WE98;H0Y5C6;H0Y5F3;Q14315-2;Q14315;A0A669KBC6;O75369-8;O75369;O75369-3;O75369-9;O75369-2;O75369-6;O75369-4;O75369-5	P21333;P21333-2;Q60FE5;A0A7P0NMY4	54;54;53;33;8;8;8;6;3;3;3;2;1;1;1;1;1;1;1;1	54;54;53;33;8;8;8;6;3;3;3;2;1;1;1;1;1;1;1;1	54;54;53;33;8;8;8;6;3;3;3;2;1;1;1;1;1;1;1;1	Filamin-A	FLNA	sp|P21333|FLNA_HUMAN Filamin-A OS=Homo sapiens OX=9606 GN=FLNA PE=1 SV=4;sp|P21333-2|FLNA-2_HUMAN Isoform of P21333, Isoform 2 of Filamin-A OS=Homo sapiens OX=9606 GN=FLNA PE=1 SV=4;tr|Q60FE5|Q60FE5_HUMAN Isoform of P21333, Filamin-A OS=Homo sapiens OX=960		20	54	54	54	43	46	43	27	29	8	38	37	46	51	30	33	37	42	43	46	43	27	29	8	38	37	46	51	30	33	37	42	43	46	43	27	29	8	38	37	46
[truncated: 102 more columns]
