# Supplementary material for: Some structural features of the peptide profile of myelin basic protein-hydrolyzing antibodies in schizophrenic patients
Source: PeerJ. 2023 Jul 6;11:e15584. doi: 10.7717/peerj.15584 (PMC10329820; doi:10.7717/peerj.15584)
Supplement: Table S2 [file peerj-11-15584-s002.xlsx]

## Sheet: Лист1
m/z	z	MW	RT (min)	Number of samples with m/z (total N=8)	SCH1_1	SCH1_2	SCH1_3	SCH1_aver	SCH2_1	SCH2_2	SCH2_3	SCH2_aver	SCH3_1	SCH3_2	SCH3_3	SCH3_aver	SCH4_1	SCH4_2	SCH4_3	SCH4_aver	SCH5_1	SCH5_2	SCH5_3	SCH5_aver	SCH6_1	SCH6_2	SCH6_3	SCH6_aver	SCH7_1	SCH7_2	SCH7_3	SCH7_aver	SCH8_1	SCH8_2	SCH8_3	SCH8_aver	Anova	Maximum CV	Max fold change
322.182	3	963.525	16.1	4	40000	47000	64000	50333.3	52000	60000	9400	40466.7	29000	25000	23000	25666.7	160000	370000	110000	213333	300000	340000	380000	340000	170000	180000	170000	173333	200000	200000	260000	220000	92000	100000	91000	94333.3	7.58e-07	80.0764	7.32367
332.195	2	662.375	57.1	4	31000	32000	35000	32666.7	45000	52000	48000	48333.3	19000	19000	19000	19000	200000	600000	210000	336667	330000	320000	330000	326667	140000	160000	150000	150000	150000	140000	160000	150000	62000	56000	72000	63333.3	3.91e-06	98.8675	6.70724
333.706	2	665.397	22	1	110	150	0	86.6667	700	910	1100	903.333	13000	8500	17000	12833.3	490	0	450	313.333	2500	5000	3600	3700	1900	1100	3200	2066.67	110000	130000	130000	123333	2900	390	320	1203.33	0.000103778	226.859	116.148
338.177	3	1011.51	24.6	5	110000	110000	130000	116667	73000	57000	110000	80000	860000	860000	1000000	906667	420000	270000	450000	380000	90000	120000	120000	110000	100000	140000	120000	120000	82000	86000	97000	88333.3	91000	87000	80000	86000	9.22e-08	118.873	6.9149
338.697	2	675.38	63.8	3	18000	21000	0	13000	820000	730000	1000000	850000	18000	5400	20000	14466.7	15000	12000	47000	24666.7	670000	770000	810000	750000	310000	200000	230000	246667	81000	79000	71000	77000	42000	27000	57000	42000	7.3e-05	211.705	32.2741
339.696	2	677.378	22.1	1	6000	2600	7000	5200	100000	110000	46000	85333.3	1700	1900	1000	1533.33	14000	17000	6900	12633.3	180000	190000	190000	186667	40000	38000	39000	39000	36000	25000	46000	35666.7	23000	23000	21000	22333.3	4.9e-05	122.608	13.5242
340.14	3	1017.4	48.3	1	0	0	180	60	0	0	0	0	470	180	420	356.667	0	370	0	123.333	6000	3900	3400	4433.33	520000	550000	560000	543333	160	940	3600	1566.67	200	430	1100	576.667	5.91e-05	387.298	5127.5
345.168	2	688.321	28.9	5	3300	20000	16000	13100	41000	35000	38000	38000	27000	25000	17000	23000	98000	450000	140000	229333	790000	740000	860000	796667	190000	150000	220000	186667	270000	280000	300000	283333	160000	140000	110000	136667	8.5e-06	118.38	14.0552
345.419	4	1377.65	17.7	1	0	0	0	0	570	640	1300	836.667	8.1	110	0	39.3667	58	410	0	156	140	15000	120	5086.67	230000	6000000	970000	2400000	2400	870	1400	1556.67	15000	11	110	5040.33	0.000123647	407.953	9983.48
355.517	3	1063.53	20.1	1	4600	1100	5900	3866.67	250000	250000	250000	250000	4100	4300	3700	4033.33	41000	47000	27000	38333.3	45000	44000	48000	45666.7	23000	7800	22000	17600	31000	33000	23000	29000	28000	31000	28000	29000	0.000731485	148.947	7.05265
366.698	4	1462.76	57.6	1	74000	71000	69000	71333.3	63000	60000	44000	55666.7	76000	79000	86000	80333.3	470000	1400000	510000	793333	1300	1100	1600	1333.33	7700	16000	19000	14233.3	20000	23000	21000	21333.3	11000	3200	39000	17733.3	1.79e-09	295.086	22.8679
369.201	2	736.387	27.6	1	1700	2200	1400	1766.67	68000	69000	41000	59333.3	210000	190000	220000	206667	4400	5000	3000	4133.33	53000	54000	54000	53666.7	860	59000	56000	38620	64000	75000	62000	67000	1100	3400	1700	2066.67	5.2e-06	119.678	38.2711
371.199	4	1480.77	12.1	1	470	0	220	230	20000	22000	1500	14500	560	8100	720	3126.67	0	460	290	250	17000	18000	20000	18333.3	2100000	380000	2300000	1.59333e+06	43000	55000	55000	51000	640	14000	10000	8213.33	3.75e-08	358.912	1223.19
374.155	3	1119.44	75.4	1	0	0	0	0	0	0	0	0	0	4500	0	1500	720	410	730	620	11000	13000	14000	12666.7	1600000	1600000	1500000	1.56667e+06	7600	5200	8200	7000	1900	1900	400	1400	0.000111179	387.298	5722.26
376.203	2	750.391	48.1	1	0.7	0.24	46	15.6467	1000	4900	700	2200	220	150	0.38	123.46	1300	2400	40	1246.67	1100	3200	330	1543.33	1400000	1500000	1500000	1.46667e+06	500	6400	8100	5000	890	280	240	470	1.61e-08	387.298	1016325510
384.691	2	767.367	33.5	3	0	190	0	63.3333	250	150	1300	566.667	0	0	110	36.6667	52000	24000	3200	26400	500000	510000	520000	510000	630000	590000	330000	516667	280000	240000	260000	260000	3600	2100	940	2213.33	1.3e-05	276.357	646.463
388.808	3	1163.4	61.9	1	0	0	0	0	2500	5900	4800	4400	0	0	0	0	0	1100	0	366.667	18000	19000	19000	18666.7	340000	380000	340000	353333	230	380	180	263.333	300	0	0	100	0.000219799	251.502	Infinity
395.176	2	788.338	48.2	1	0	0	0	0	1400	0	1600	1000	440	540	0	326.667	0	0	0	0	860	770	1100	910	840000	850000	850000	846667	0	5400	4400	3266.67	280	420	550	416.667	0.000111001	268.14	Infinity
400.141	2	798.268	56.7	2	19000	16000	23000	19333.3	23000	22000	17000	20666.7	18000	18000	16000	17333.3	110000	46000	86000	80666.7	370000	380000	380000	376667	63000	94000	84000	80333.3	190000	150000	190000	176667	84000	80000	57000	73666.7	7.45e-07	111.294	10.1364
403.192	2	804.369	39.2	2	15	1100	330	481.667	40000	19000	0	19666.7	1400	0.78	14	471.593	1900	2300	8.1	1402.7	180000	200000	200000	193333	140000	120000	120000	126667	2000	3500	2400	2633.33	580	1000	270	616.667	2.71e-06	246.351	287.825
405.645	2	809.276	36.1	3	21000	26000	27000	24666.7	13000	12000	11000	12000	70000	64000	65000	66333.3	240	8500	1600	3446.67	110000	120000	120000	116667	12000000	14000000	13000000	13000000	280000	290000	280000	283333	83000	94000	76000	84333.3	1.24e-07	257.251	886.541
414.206	2	826.397	36.4	5	80000	88000	99000	89000	85000	90000	82000	85666.7	33000	32000	36000	33666.7	120000	590000	130000	280000	900000	930000	930000	920000	380000	420000	410000	403333	390000	400000	390000	393333	190000	200000	180000	190000	5.85e-06	95.5874	6.58681
414.631	2	827.248	36.1	1	0	0	150	50	0	370	0	123.333	380	330	190	300	0	0	0	0	740	2000	1900	1546.67	850000	940000	820000	870000	15000	15000	13000	14333.3	390	3200	760	1450	1.22e-05	264.591	Infinity
415.581	2	829.147	35	2	18000	22000	25000	21666.7	410000	430000	100000	313333	520	250	3100	1290	0	0	0	0	170000	150000	120000	146667	32000	55000	54000	47000	22000	14000	20000	18666.7	19000	21000	13000	17666.7	6.79e-10	387.298	4256.71
427.219	3	1278.64	48.6	6	74000	53000	45000	57333.3	180000	130000	120000	143333	120000	140000	100000	120000	100000	830000	79000	336333	760000	730000	730000	740000	21000000	24000000	24000000	23000000	1200000	1100000	1200000	1.16667e+06	230000	200000	200000	210000	1.03e-06	237.422	197.054
429.75	2	857.486	38.6	1	0	0	2900	966.667	8700	7100	1900	5900	0	480	0	160	6600	0.82	0	2200.27	490000	420000	460000	456667	70000	83000	82000	78333.3	91000	88000	93000	90666.7	32000	32000	13000	25666.7	6.21e-05	261.969	201.545
430.219	4	1716.85	49.2	2	0	1500	1.2	500.4	780	2100	4200	2360	4600	3800	2.5	2800.83	240000	0	310000	183333	68000	70000	110000	82666.7	4600000	46000	3200000	2.61533e+06	24000	110000	80000	71333.3	4700	8700	7000	6800	3.58e-05	299.466	855.094
433.557	3	1297.65	46.4	6	150000	86000	160000	132000	460000	440000	19000	306333	40000	73000	270000	127667	96000	84000	280000	153333	500000	500000	530000	510000	2300000	10000000	11000000	7.76667e+06	260000	490000	490000	413333	180000	120000	170000	156667	1.84e-06	243.418	35.1996
433.895	3	1298.66	45.7	7	69000	59000	70000	66000	240000	250000	170000	220000	200000	270000	270000	246667	140000	120000	35000	98333.3	350000	380000	360000	363333	14000000	2500000	2300000	6.26667e+06	440000	480000	420000	446667	120000	120000	110000	116667	6.66e-09	291.677	52.1121
443.558	3	1327.65	34	2	1500	2800	3200	2500	4000	3700	2100	3266.67	14000	7900	18000	13300	4200	59000	2000	21733.3	56000	49000	64000	56333.3	5800000	6400000	6100000	6100000	170000	180000	190000	180000	19000	15000	18000	17333.3	5.35e-06	256.481	545.383
445.543	3	1333.61	45.5	3	34000	37000	52000	41000	34000	40000	37000	37000	72000	64000	69000	68333.3	9000	81000	51000	47000	110000	110000	120000	113333	3600000	2500000	2200000	2.76667e+06	220000	260000	210000	230000	41000	36000	61000	46000	9.68e-07	222.572	36.6027
447.223	2	892.432	55.5	3	15000	13000	23000	17000	120000	110000	160000	130000	50000	26000	32000	36000	33000	60000	39000	44000	44000	40000	45000	43000	18000000	17000000	16000000	17000000	96000	85000	95000	92000	450000	420000	350000	406667	1.83e-06	257.07	510.993
447.886	3	1340.64	40.9	2	750	2600	1800	1716.67	1700	4800	4100	3533.33	8800	5800	6000	6866.67	1500	5.7	1500	1001.9	190000	170000	170000	176667	2000000	2100000	1800000	1.96667e+06	51000	32000	13000	32000	9900	4900	5800	6866.67	1.9e-06	239.173	221.828
448.558	3	1342.65	47.9	3	33000	30000	36000	33000	14000	20000	13000	15666.7	48000	51000	47000	48666.7	90000	8700	96000	64900	150000	160000	160000	156667	3900000	3500000	3500000	3.63333e+06	97000	140000	130000	122333	49000	38000	41000	42666.7	1.62e-06	234.833	57.7355
455.532	3	1363.57	55	1	0	0	1000	333.333	600	950	0	516.667	1400	390	580	790	5700	27000	7600	13433.3	8200	7600	12000	9266.67	620000	690000	370000	560000	20000	22000	21000	21000	3000	3800	1900	2900	8.35e-06	254.523	382.776
460.223	3	1377.65	17.7	1	360	220	320	300	2200	2800	1500	2166.67	1200	100	0	433.333	10000	1500	980	4160	260	22000	1100	7786.67	280000	8800000	1300000	3460000	3200	2100	1600	2300	26000	630	0	8876.67	4.25e-08	412.361	8580.69
460.91	3	1379.71	49.9	5	10000	9100	3300	7466.67	160000	27000	180000	122333	1300	6500	25000	10933.3	2400	600000	4200	202200	1600000	1600000	1500000	1.56667e+06	530000	420000	520000	490000	480000	470000	470000	473333	140000	120000	120000	126667	9.89e-08	134.376	306.657
461.221	2	920.428	30	5	23000	59000	53000	45000	74000	72000	64000	70000	38000	37000	43000	39333.3	120000	800000	220000	380000	750000	740000	770000	753333	250000	310000	220000	260000	340000	350000	330000	340000	180000	180000	170000	176667	0.000236242	98.4749	5.15191
463.997	4	1851.96	46.7	4	25000	29000	30000	28000	54000	45000	35000	44666.7	37000	38000	50000	41666.7	1100000	230000	1100000	810000	100000	110000	100000	103333	26000	22000	33000	27000	470000	520000	520000	503333	160000	120000	120000	133333	2.71e-05	147.408	9.94283
467.706	2	933.398	71.8	1	0	660	0	220	0	0	0	0	0	0	0	0	3400	1200	1300	1966.67	11000	15000	9800	11933.3	380000	300000	300000	326667	34000	31000	28000	31000	130000	81000	63000	91333.3	5.34e-05	379.103	3876.2
467.742	2	933.47	26.9	4	32000	34000	36000	34000	850000	850000	910000	870000	33000	35000	37000	35000	180000	670000	220000	356667	150000	150000	160000	153333	91000	140000	86000	105667	77000	83000	73000	77666.7	110000	110000	110000	110000	0.000142285	129.296	5.12098
472.242	3	1413.7	48	3	800	600	740	713.333	2000	1200	3500	2233.33	2800	2200	2300	2433.33	9600	19000	13000	13866.7	340000	330000	320000	330000	170000	150000	120000	146667	120000	150000	150000	140000	52000	41000	48000	47000	6.51e-06	130.785	72.6063
474.86	3	1421.56	62.3	1	0	0	0	0	140	0	0	46.6667	0	250	310	186.667	0	0	150	50	4100	6600	3000	4566.67	250000	150000	290000	230000	17000	20000	8000	15000	940	290	46	425.333	8.15e-05	387.298	19776.5
479.467	4	1913.84	54.2	4	14000	26000	38000	26000	1900000	1800000	2600000	2100000	50000	27000	54000	43666.7	16000	9600	14000	13200	600000	710000	690000	666667	130000	140000	130000	133333	140000	160000	130000	143333	140000	93000	82000	105000	1.1e-06	172.311	37.9825
481.242	2	960.47	52.1	5	43000	40000	51000	44666.7	110000	300000	95000	168333	24000	22000	10000	18666.7	270000	220000	74000	188000	230000	220000	240000	230000	4200000	4300000	4300000	4.26667e+06	240000	220000	200000	220000	87000	83000	58000	76000	3.15e-06	214.644	35.1462
486.924	3	1457.75	33.8	3	2900	590	2200	1896.67	4100	5400	1300	3600	2700	3200	3800	3233.33	4300	19000	5400	9566.67	460000	430000	490000	460000	310000	340000	310000	320000	300000	300000	300000	300000	120000	100000	83000	101000	8.6e-07	154.193	75.9562
487.573	3	1459.7	57.5	1	390	890	500	593.333	2800	5600	6300	4900	840	1900	1300	1346.67	670	14000	1400	5356.67	4500	4400	2800	3900	92000	89000	94000	91666.7	530	260	1600	796.667	450000	380000	350000	393333	4.4e-06	209.974	103.585
487.975	4	1947.87	67.2	3	28000	15000	4900	15966.7	38000	39000	48000	41666.7	8800	8000	3600	6800	67000	740000	86000	297667	1000000	990000	1100000	1030000	140000	130000	100000	123333	290000	310000	280000	293333	110000	100000	81000	97000	0.00011979	145.355	14.4142
490.733	2	979.452	38.4	1	16000	15000	22000	17666.7	43000	30000	33000	35333.3	38000	24000	39000	33666.7	1.7	37000	4300	13767.2	300	17000	38000	18433.3	2100000	2300000	2100000	2.16667e+06	97000	98000	82000	92333.3	3800	1500	13000	6100	8.47e-09	242.496	1050.79
491.498	3	1471.47	36.4	6	78000	84000	100000	87333.3	140000	150000	150000	146667	58000	49000	56000	54333.3	75000	640000	140000	285000	980000	1100000	1100000	1060000	500000	540000	440000	493333	470000	500000	450000	473333	250000	240000	250000	246667	7.78e-08	90.9682	10.2679
494.596	3	1480.77	12.1	2	1100	170	1100	790	61000	58000	1700	40233.3	1900	6000	2400	3433.33	1400	110000	3300	38233.3	45000	43000	44000	44000	5100000	930000	5300000	3.77667e+06	110000	120000	110000	113333	2500	34000	36000	24166.7	1.38e-08	288.737	1862.47
502.936	3	1505.79	72.9	2	4000	7100	3000	4700	55000	51000	58000	54666.7	200000	150000	240000	196667	13000	18000	11000	14000	500000	510000	520000	510000	44000	38000	31000	37666.7	25000	28000	24000	25666.7	35000	19000	33000	29000	0.000670428	152.179	7.04677
505.549	3	1513.62	74.2	4	30000	27000	46000	34333.3	47000	49000	64000	53333.3	130000	110000	160000	133333	2600	5300	570	2823.33	630000	630000	680000	646667	8100000	8000000	7500000	7.86667e+06	330000	300000	280000	303333	30000	23000	54000	35666.7	5.75e-07	230.056	501.183
510.221	3	1527.64	75.3	2	5900	3800	5600	5100	1900	4000	7000	4300	22000	35000	39000	32000	1000	1900	1100	1333.33	140000	130000	150000	140000	5000000	4700000	4900000	4.86667e+06	24000	24000	37000	28333.3	4800	2500	7500	4933.33	6.57e-08	257.296	703.272
512.529	3	1534.56	35.3	1	0	400	0	133.333	0	1500	0	500	1900	0	520	806.667	0	21000	1800	7600	140000	150000	170000	153333	70000	67000	45000	60666.7	40000	50000	35000	41666.7	20000	15000	14000	16333.3	1.11e-05	298.636	540.331
512.847	3	1535.52	21.6	6	80000	74000	85000	79666.7	190000	170000	210000	190000	29000	38000	32000	33000	240000	1100000	280000	540000	1200000	1200000	1200000	1200000	600000	670000	670000	646667	430000	480000	420000	443333	210000	190000	250000	216667	3.59e-05	95.0356	6.54758
513.018	4	2048.04	60.8	6	53000	47000	1400	33800	460000	530000	500000	496667	15000	20000	21000	18666.7	110000	56000	130000	98666.7	1600000	1600000	1500000	1.56667e+06	180000	220000	210000	203333	280000	290000	280000	283333	99000	110000	100000	103000	1.07e-05	139.589	19.0568
525.022	4	2096.06	70	1	8400	9500	2000	6633.33	8900	31000	28000	22633.3	7300	21000	6700	11666.7	14000	12000	8100	11366.7	23000	26000	18000	22333.3	84000	91000	63000	79333.3	910000	950000	900000	920000	25000	49000	31000	35000	0.000185452	218.442	23.0104
535.248	2	1068.48	62.5	3	54000	44000	120000	72666.7	18000	23000	16000	19000	300000	300000	300000	300000	31000	24000	31000	28666.7	76000	71000	67000	71333.3	38000	33000	44000	38333.3	170000	160000	170000	166667	130000	100000	110000	113333	1.12e-09	88.9956	18.0361
541.755	2	1081.5	75.4	5	15000	22000	22000	19666.7	48000	71000	38000	52333.3	11000	590000	73000	224667	190000	30000	230000	150000	1300000	1300000	1300000	1300000	54000000	52000000	51000000	5.23333e+07	2000000	1900000	1800000	1900000	330000	290000	300000	306667	9.59e-06	248.592	383.777
550.269	2	1098.52	75.4	4	1600	2500	4700	2933.33	1800	3200	13000	6000	65000	190000	5700	86900	35000	34000	55000	41333.3	240000	310000	250000	266667	12000000	12000000	12000000	12000000	230000	230000	280000	246667	130000	130000	180000	146667	0.000644175	250.958	156.209
552.29	3	1653.85	46.9	5	30000	8700	14000	17566.7	1800000	1800000	1600000	1.73333e+06	690000	800000	720000	736667	9400	780000	8600	266000	87000	110000	110000	102333	55000	49000	58000	54000	480000	450000	440000	456667	120000	100000	91000	103667	0.000192748	130.989	17.1499
552.875	5	2759.34	71.8	3	45	22000	180	7408.33	18000	41000	15000	24666.7	16000	16000	5100	12366.7	21000	15000	12000	16000	1200000	1200000	1200000	1200000	67000	60000	54000	60333.3	430000	460000	430000	440000	190000	180000	130000	166667	1.16e-06	165.096	82.2336
556.254	2	1110.49	31.8	1	1300	820	0	706.667	15000	3900	39000	19300	40000	13000	37000	30000	6300	810	1200	2770	1200	4200	2600	2666.67	44000	13000	14000	23666.7	970	2100	150	1073.33	200000	160000	190000	183333	1.03e-05	209.283	4.03295
561.279	2	1120.54	73.4	1	1900	21000	1300	8066.67	37000	48000	28000	37666.7	27000	41000	33000	33666.7	63000	8200	68000	46400	94000	93000	100000	95666.7	690000	660000	620000	656667	93000	88000	99000	93333.3	110000	88000	61000	86333.3	0.00274846	155.044	7.50782
563.78	2	1125.55	62.3	5	36000	9100	94000	46366.7	120000	130000	210000	153333	110000	110000	120000	113333	44000	69000	99000	70666.7	300000	280000	300000	293333	5800000	6000000	5600000	5800000	120000	110000	120000	116667	73000	67000	50000	63333.3	5.15e-06	230.733	38.0272
565.641	3	1693.9	60.3	7	290000	260000	210000	253333	480000	540000	450000	490000	150000	160000	160000	156667	140000	74000	59000	91000	320000	350000	300000	323333	300000	340000	310000	316667	280000	260000	280000	273333	660000	680000	540000	626667	3.2e-13	75.4926	14.0235
566.279	2	1130.54	73.6	1	4800	6200	1300	4100	46000	36000	7900	29966.7	26000	94000	30000	50000	13000	40000	14000	22333.3	37000	26000	38000	33666.7	360000	390000	350000	366667	88000	77000	81000	82000	55000	30000	41000	42000	0.0022643	144.982	4.36476
570.288	3	1707.84	41.2	4	54000	87000	91000	77333.3	92000	49000	69000	70000	9400	4300	12000	8566.67	15000	85000	12000	37333.3	1600000	1500000	1600000	1.56667e+06	110000	70000	120000	100000	440000	420000	400000	420000	200000	160000	150000	170000	5.48e-08	164.06	47.8361
572.248	2	1142.48	61.9	3	20000	14000	9100	14366.7	360000	340000	350000	350000	25000	16000	23000	21333.3	18000	39000	78000	45000	360000	320000	330000	336667	4600000	4500000	4700000	4600000	38000	37000	59000	44666.7	22000	16000	15000	17666.7	6.58e-05	223.982	63.5699
574.793	2	1147.57	73.5	1	1900	2100	3500	2500	25000	23000	1600	16533.3	8600	71000	6200	28600	9400	4400	4600	6133.33	10000	8100	8500	8866.67	260000	220000	240000	240000	30000	30000	29000	29666.7	22000	12000	15000	16333.3	1.63e-05	178.53	14.7941
575.312	2	1148.61	41.4	4	18000	16000	25000	19666.7	280000	260000	270000	270000	49000	11000	38000	32666.7	62000	160000	41000	87666.7	710000	630000	660000	666667	200000	230000	240000	223333	230000	220000	180000	210000	65000	50000	62000	59000	0.000224916	189.326	4.2534
576.519	4	2302.05	59.9	4	100000	0	51000	50333.3	27000	540000	420000	329000	180000	4500	120000	101500	100000	68000	150000	106000	17000	38000	31000	28666.7	88000	93000	0	60333.3	320000	350000	0	223333	290000	2200	290000	194067	1.62e-08	373.257	80.8597
582.708	2	1163.4	61.9	1	0	0	0	0	40000	41000	52000	44333.3	0	0	480	160	0	0	0	0	49000	43000	56000	49333.3	1000000	990000	990000	993333	1000	460	1300	920	0	340	380	240	0.000228445	387.298	14172.5
583.641	3	1747.9	73.7	5	7800	26000	10000	14600	310000	320000	350000	326667	40000	38000	64000	47333.3	78000	190000	49000	105667	100000	140000	110000	116667	200000	200000	180000	193333	830000	700000	890000	806667	220000	130000	130000	160000	4.13e-05	111.794	7.40831
589.025	4	2352.07	15.6	4	19000	20000	24000	21000	2300000	2400000	2600000	2.43333e+06	71000	73000	82000	75333.3	9100	26000	11000	15366.7	2100000	2300000	2300000	2.23333e+06	520000	550000	500000	523333	70000	76000	69000	71666.7	100000	100000	110000	103333	0.0001569	144.24	31.3967
594.285	2	1186.55	54.2	4	54000	59000	41000	51333.3	76000	87000	77000	80000	21000	25000	35000	27000	23000	370000	100000	164333	500000	440000	530000	490000	170000	30000	130000	110000	210000	210000	170000	196667	96000	110000	130000	112000	1.11e-06	99.2876	6.84826
603.459	5	3012.26	71.8	5	8500	110000	14000	44166.7	52000	81000	39000	57333.3	450000	390000	240000	360000	80000	210000	91000	127000	3300000	3400000	3300000	3.33333e+06	1000000	930000	960000	963333	1200000	1300000	1200000	1.23333e+06	110000	90000	110000	103333	5.66e-05	138.319	20.3043
607.076	4	2424.27	60.9	2	13000	11000	7100	10366.7	57000	69000	68000	64666.7	97000	85000	59000	80333.3	230000	35000	230000	165000	10000	10000	13000	11000	94000	64000	99000	85666.7	330000	330000	360000	340000	66000	53000	22000	47000	0.000941303	108.864	5.0855
610.82	4	2439.25	62.6	3	22000	33000	32000	29000	59000	74000	79000	70666.7	130000	72000	170000	124000	30000	58000	18000	35333.3	170000	190000	170000	176667	830000	730000	780000	780000	22000	28000	21000	23666.7	92000	100000	44000	78666.7	3.83e-05	147.991	7.75777
613.3	3	1836.88	73.8	4	11000	9600	18000	12866.7	100000	96000	59000	85000	37000	25000	34000	32000	51000	95000	79000	75000	1000000	1000000	1100000	1.03333e+06	310000	310000	290000	303333	500000	460000	450000	470000	150000	150000	160000	153333	0.00207824	121.91	6.75255
625.307	2	1248.6	61.1	7	180000	170000	17000	122333	410000	470000	490000	456667	82000	97000	78000	85666.7	440000	330000	490000	420000	2200000	2200000	2200000	2200000	1900000	840000	1000000	1.24667e+06	690000	690000	700000	693333	330000	360000	330000	340000	2.85e-05	100.619	7.15195
630.322	2	1258.63	39.8	2	5	0	77	27.3333	270000	190000	63000	174333	540	670	980	730	0	0	0	0	230000	240000	220000	230000	96000	64000	54000	71333.3	780	2800	2800	2126.67	2800	490	3200	2163.33	4.31e-07	387.298	5425.39
640.952	3	1919.84	38	6	89000	120000	110000	106333	170000	140000	180000	163333	66000	170000	52000	96000	220000	15000	16000	83666.7	810000	780000	900000	830000	1300000	900000	850000	1.01667e+06	650000	700000	590000	646667	630000	490000	310000	476667	1.48e-06	99.7184	11.0989
643.942	3	1928.8	54.1	7	120000	82000	170000	124000	6500000	6100000	7300000	6.63333e+06	160000	150000	160000	156667	83000	180000	96000	119667	1300000	1500000	1400000	1400000	310000	320000	240000	290000	410000	400000	340000	383333	310000	340000	280000	310000	2.87e-07	183.282	23.2638
646.356	3	1936.05	73	4	55000	37000	61000	51000	55000	29000	6000	30000	54000	98000	60000	70666.7	110000	1700000	97000	635667	100000	130000	130000	120000	150000	110000	130000	130000	180000	170000	170000	173333	90000	64000	130000	94666.7	6.94e-07	205.372	8.41952
670.831	2	1339.65	27.5	1	160	260	0	140	1600	5600	5500	4233.33	890000	900000	800000	863333	12	510	110	210.667	9000	14000	7500	10166.7	44000	82000	47000	57666.7	15000	30000	15000	20000	2800	940	1200	1646.67	0.000487677	240.869	219.564
673.946	5	3364.69	68	5	38000	36000	1200	25066.7	1400000	1400000	1100000	1300000	510000	510000	550000	523333	32000	130000	36000	66000	170000	140000	150000	153333	380000	170000	560000	370000	74000	97000	170000	113667	560000	590000	410000	520000	0.00445064	107.799	5.81615
676.319	2	1350.62	54.9	3	18000	11000	35000	21333.3	12000	19000	23000	18000	68000	22000	87000	59000	53000	13000	18000	28000	13000	20000	31000	21333.3	100000	160000	190000	150000	830000	740000	840000	803333	150000	130000	120000	133333	1.87e-06	165.95	17.9327
682.825	2	1363.64	26.1	3	640	16000	540	5726.67	18000	29000	2100	16366.7	370000	510000	350000	410000	190000	130000	560000	293333	460000	550000	520000	510000	69000	71000	64000	68000	190	580	160	310	12000	5400	6000	7800	1.33e-06	161.662	86.6621
686.384	2	1370.75	72.6	3	1100	3000	2100	2066.67	56000	37000	32000	41666.7	130000	150000	140000	140000	14000	33000	47000	31333.3	660000	600000	640000	633333	4900	40000	59000	34633.3	170000	160000	150000	160000	44000	62000	30000	45333.3	1.3e-05	146.579	22.2903
690.814	2	1379.61	74.9	1	15000	10000	7900	10966.7	110000	91000	64000	88333.3	21000	32000	15000	22666.7	15000	190000	9300	71433.3	69000	69000	78000	72000	910000	1200000	1200000	1.10333e+06	70000	65000	77000	70666.7	50000	58000	59000	55666.7	9.23e-05	191.676	14.2568
694.001	3	2078.98	58.5	7	160000	320000	320000	266667	220000	220000	190000	210000	110000	140000	140000	130000	450000	200000	370000	340000	190000	200000	190000	193333	17000	26000	20000	21000	740000	750000	1300000	930000	2100000	2600000	2500000	2400000	1.07e-08	136.646	27.5941
715.867	2	1429.72	60.6	3	6000	12000	1300	6433.33	47000	56000	65000	56000	32000	37000	30000	33000	62000	270000	63000	131667	220000	240000	220000	226667	9700000	10000000	9600000	9.76667e+06	89000	86000	98000	91000	140000	66000	180000	128667	0.00197305	250.568	47.9134
718.785	2	1435.56	42.4	1	33	0	160	64.3333	870	1100	1300	1090	4800	1700	4200	3566.67	0	0	0	0	30000	19000	42000	30333.3	6100000	6000000	6400000	6.16667e+06	4500	18000	15000	12500	6100	13000	2200	7100	8.28e-08	387.298	1.38709e+08
731.369	4	2921.45	57.5	3	10000	8500	8700	9066.67	6500	4000	7200	5900	45000	53000	36000	44666.7	8000	120000	13000	47000	150000	130000	160000	146667	11000000	11000000	9300000	1.04333e+07	61000	63000	64000	62666.7	310000	460000	240000	336667	1.18e-06	253.393	475.108
736.743	2	1471.47	36.4	6	140000	8400	120000	89466.7	140000	140000	120000	133333	32000	60000	39000	43666.7	10000	280000	69000	119667	730000	850000	740000	773333	250000	330000	240000	273333	350000	320000	360000	343333	190000	230000	260000	226667	1.28e-05	92.2974	6.98669
738.824	2	1475.63	46.3	2	3	0.73	710	237.91	15000	13000	2100	10033.3	820	410	1200	810	250000	10000	250000	170000	13000	11000	6300	10100	7600	3400	2400	4466.67	120000	130000	130000	126667	6300	9200	4000	6500	0.000232182	251.485	9.94257
740.787	2	1479.56	22.5	3	19000	16000	20000	18333.3	33000	43000	39000	38333.3	12000	14000	13000	13000	51000	140000	79000	90000	340000	340000	340000	340000	140000	140000	150000	143333	140000	140000	140000	140000	73000	65000	75000	71000	8.74e-07	96.2559	8.06766
741.389	2	1480.76	12.1	1	0.63	0	0	0.21	27000	26000	0	17666.7	0	330	350	226.667	890	0	0	296.667	21000	19000	20000	20000	2600000	580000	2700000	1960000	60000	63000	66000	63000	14000	21000	11000	15333.3	0.000304025	287.305	3244.58
743.61	4	2970.41	72.7	3	9300	21000	19000	16433.3	41000	49000	28000	39333.3	880000	820000	940000	880000	14000	14000	23000	17000	240000	230000	180000	216667	40000	49000	41000	43333.3	77000	68000	65000	70000	330000	300000	150000	260000	1.89e-06	146.389	15.8576
749.869	2	1497.72	50.5	2	0	4100	3400	2500	15000	37000	11000	21000	3900	2300	3400	3200	930	10000	3700	4876.67	1900	6200	5600	4566.67	190000	88000	130000	136000	11000	12000	20000	14333.3	8100000	8000000	7400000	7.83333e+06	1.25e-05	263.385	810.104
759.383	2	1516.75	39.7	3	11000	20000	21000	17333.3	33000	59000	110000	67333.3	20000	12000	19000	17000	0	230000	38000	89333.3	110000	95000	110000	105000	10000000	11000000	10000000	1.03333e+07	120000	120000	120000	120000	12000	21000	27000	20000	7.89e-09	265.604	1612.35
775.912	2	1549.81	62	3	5500	6500	6500	6166.67	490000	490000	490000	490000	33000	32000	52000	39000	19000	39000	20000	26000	17000	22000	23000	20666.7	50000	54000	60000	54666.7	750000	710000	710000	723333	1400000	1400000	1300000	1.36667e+06	0.000101895	165.669	14.2646
785.03	3	2352.07	15.6	3	16000	13000	18000	15666.7	2300000	2400000	2200000	2300000	59000	58000	60000	59000	29000	97000	29000	51666.7	1600000	1600000	1600000	1600000	280000	310000	250000	280000	44000	48000	49000	47000	79000	82000	60000	73666.7	5.44e-05	153.148	24.9301
807.376	2	1612.74	53.9	3	2600	4800	1600	3000	22000	17000	13000	17333.3	400000	390000	400000	396667	7400	48000	62000	39133.3	1400000	1400000	1400000	1400000	4300000	4300000	4300000	4300000	1700	4300	4600	3533.33	66000	92000	15000	57666.7	5.18e-06	184.258	291.926
851.393	2	1700.77	59.3	4	43000	22000	36000	33666.7	110000	81000	100000	97000	47000	30000	40000	39000	91000	410000	210000	237000	2300000	2300000	2100000	2.23333e+06	7600000	7800000	7400000	7600000	1100000	960000	670000	910000	52000	82000	47000	60333.3	5.6e-06	178.606	87.6655
898.126	4	3588.48	30.4	1	0	0	0	0	24000	15000	2000	13666.7	3200	0	2300	1833.33	0	0	0	0	280000	280000	270000	276667	1500	5400	9100	5333.33	2500	330	6500	3110	0.94	1200	670	623.647	0.000564176	265.877	227.138
1005.09	3	3012.26	71.8	3	0	7600	1100	2900	6100	330	4400	3610	59000	39000	20000	39333.3	7500	4800	10000	7433.33	1200000	880000	580000	886667	150000	98000	140000	129333	290000	220000	250000	253333	0	3600	1700	1766.67	1.77e-06	185.328	207.179
1021.79	3	3062.36	72	1	0	860	0	286.667	7900	4700	89000	33866.7	3400	12000	2400	5933.33	0	1700	0	566.667	14000	4200	14000	10733.3	520	6500	4400	3806.67	15000	16000	40000	23666.7	520000	550000	440000	503333	0.000245485	231.152	53.2638
1282.92	3	3845.74	80.3	3	3900	0	19000	7633.33	72000	120000	170000	120667	27000	6500	12000	15166.7	28000	260000	42000	110000	1100000	1400000	1900000	1.46667e+06	150000	86000	220000	152000	6800	23000	2900	10900	4100	14000	6400	8166.67	2.96e-06	208.627	79.6524
1333.93	3	3998.78	71.6	4	0	38000	0	12666.7	0	4800	0	1600	4200	1500	2000	2566.67	9600	120000	27000	52200	6400000	6800000	7100000	6.76667e+06	2100000	2400000	2700000	2400000	2400000	2400000	2500000	2.43333e+06	800000	760000	650000	736667	4.01e-06	217.405	1136.57
